# Supplementary material for: Novel piperazine-1,2,3-triazole leads for the potential treatment of pancreatic cancer
Source: Royal Society of Chemistry journal article supplement (doi:10.1039/d2md00289b), 2023-01-01

## Novel Piperazine-1,2,3-Triazole Leads for the Potential Treatment of Pancreatic Cancer

Jufeng Sun,<sup>[a,b]</sup> Jennifer R. Baker,<sup>[a]</sup> Cecilia C Russell,<sup>[a]</sup> Hong N. T. Pham,<sup>[c]</sup> Chloe D. Goldsmith,<sup>[c]</sup> Peter J. Cossar,<sup>[a]</sup> Jennette A. Sakoff <sup>\*[c]</sup> Christopher J. Scarlett,<sup>[d]</sup> and Adam McCluskey <sup>\*[a]</sup>

<sup>a</sup> Chemistry, School of Environmental & Life Sciences, The University of Newcastle, University Drive, Callaghan, NSW 2308, Australia. Email: Adam.McCluskey@newcastle.edu.au

<sup>b</sup> Medicinal Chemistry, School of Pharmacy, Binzhou Medical University, Yantai, 264003, China.

<sup>c</sup> Experimental Therapeutics Group, Department of Medical Oncology, Calvary Mater Newcastle Hospital, Edith Street, Waratah, NSW 2298, Australia

<sup>d</sup> School of Environmental & Life Sciences, The University of Newcastle, Ourimbah, NSW 2258, Australia.

Supporting Information

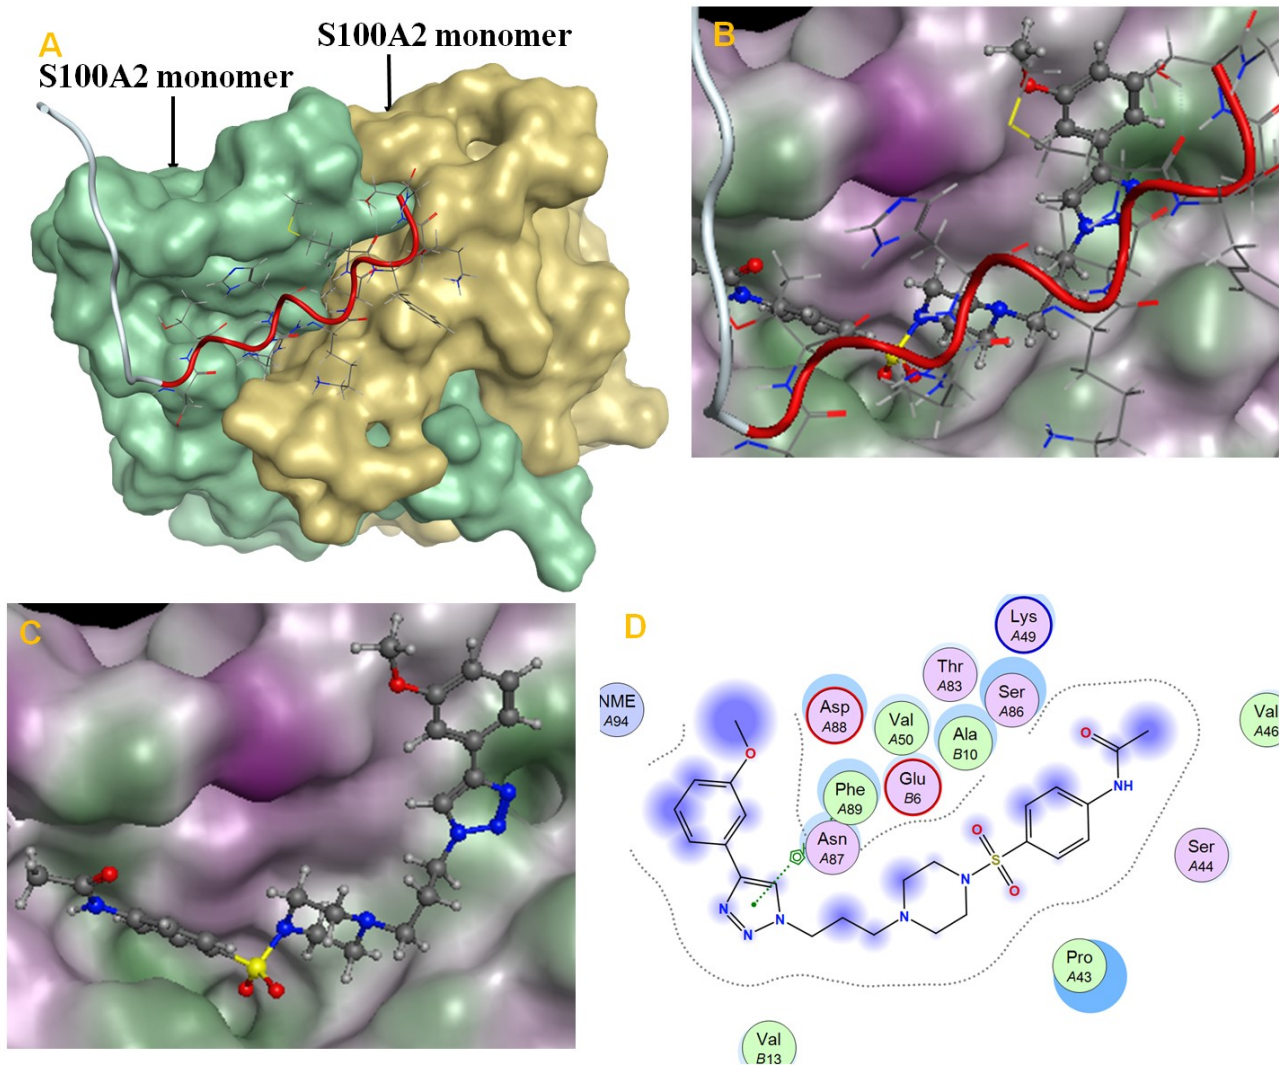

**Figure 1.** A. Top docking pose of S100A2 homodimer in complex with p53 peptide in binding pocket (in orange oval) similar dimensions to a small molecule; B. Overlay of lead 1 with p53 peptide (in red) in S100A2 binding pocket predicted by MOE and its structure (purple: hydrophilic area; green: hydrophobic area). C. Lead 1 docked in the S100A2 binding pocket (purple: hydrophilic area; green: hydrophobic area); D. Lead 1 Interaction plot of the MOE-dock. Lead 1 engages with S100A2 via arene-H interaction between triazole and PheA89 (A and B in codes of amino acids: sequence of S100A2 protein).

**Table S1.** Percentage growth inhibition evaluation (% at 25 $\mu$ M, MTT assay, n = 3) of *Library 1* analogues **2**, **14-24** in a panel of cancer cell lines and MCF10A cells. Higher values indicate higher compound potency.

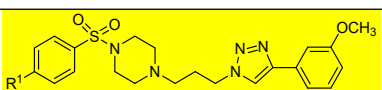

| Comp. (R <sup>1</sup> )                      | HT29 <sup>a</sup> | U87 <sup>b</sup> | MCF-7 <sup>c</sup> | A2780 <sup>d</sup> | H460 <sup>e</sup> | A431 <sup>f</sup> | Du145 <sup>g</sup> | BE2-C <sup>b</sup> | SJ-G2 <sup>h</sup> | MiaPaCa-2 <sup>i</sup> | MCF10A <sup>i</sup> |
|----------------------------------------------|-------------------|------------------|--------------------|--------------------|-------------------|-------------------|--------------------|--------------------|--------------------|------------------------|---------------------|
| <b>2</b> CH <sub>3</sub> CONH                | 25 ± 3            | 12 ± 3           | 21 ± 1             | 24 ± 2             | 14 ± 5            | 24 ± 10           | 12 ± 16            | 25 ± 8             | 11 ± 2             | 17 ± 4                 | 29 ± 9              |
| <b>14</b> H                                  | 43 ± 3            | <10              | 35 ± 7             | 28 ± 2             | 11 ± 3            | <10               | 14 ± 4             | 21 ± 3             | 20 ± 3             | <10                    | <10                 |
| <b>15</b> CH <sub>3</sub>                    | 54 ± 2            | <10              | 38 ± 4             | 46 ± 2             | 27 ± 4            | 11 ± 7            | 10 ± 12            | 13 ± 8             | 34 ± 6             | <10                    | 15 ± 20             |
| <b>16</b> (CH <sub>3</sub> ) <sub>2</sub> CH | ND                | ND               | ND                 | ND                 | ND                | ND                | ND                 | ND                 | ND                 | ND                     | ND                  |
| <b>17</b> (CH <sub>3</sub> ) <sub>3</sub> C  | 48 ± 2            | <10              | 39 ± 3             | 51 ± 4             | 38 ± 9            | <10               | <10                | 40 ± 7             | 8 ± 6              | 29 ± 1                 | 33 ± 5              |
| <b>18</b> OCH <sub>3</sub>                   | 40 ± 1            | <10              | 33 ± 2             | 47 ± 2             | 10 ± 2            | 12 ± 2            | <10                | 5 ± 3              | 38 ± 3             | <10                    | <10                 |
| <b>19</b> F                                  | 64 ± 1            | 12 ± 1           | 30 ± 3             | 32 ± 4             | 15 ± 9            | 11 ± 8            | <10                | 33 ± 8             | 10 ± 3             | 25 ± 6                 | 21 ± 7              |
| <b>20</b> Cl                                 | 72 ± 1            | <10              | 41 ± 7             | 45 ± 3             | 23 ± 5            | 10 ± 6            | <10                | 48 ± 4             | 15 ± 7             | 31 ± 6                 | 31 ± 12             |
| <b>21</b> Br                                 | 60 ± 3            | 10 ± 3           | 69 ± 4             | 56 ± 3             | 40 ± 3            | 35 ± 7            | 49 ± 2             | 56 ± 2             | 52 ± 3             | 26 ± 4                 | 42 ± 7              |
| <b>22</b> CF <sub>3</sub>                    | 55 ± 4            | 12 ± 3           | 46 ± 6             | 55 ± 4             | 25 ± 3            | <10               | 25 ± 7             | 23 ± 8             | 30 ± 4             | <10                    | 27 ± 7              |
| <b>23</b> NO <sub>2</sub>                    | 39 ± 2            | <10              | 28 ± 4             | 47 ± 1             | 14 ± 3            | 10 ± 1            | <10                | 12 ± 4             | 28 ± 4             | <10                    | 13 ± 7              |
| <b>24</b> CH <sub>3</sub> CO                 | 40 ± 2            | 14 ± 1           | 27 ± 2             | 30 ± 1             | 19 ± 7            | 18 ± 6            | 10 ± 16            | 41 ± 5             | 13 ± 2             | 27 ± 2                 | 29 ± 11             |

<sup>a</sup> colon; <sup>b</sup> glioblastoma; <sup>c</sup> breast; <sup>d</sup> ovarian; <sup>e</sup> lung; <sup>f</sup> skin; <sup>g</sup> prostate; <sup>h</sup> neuroblastoma; <sup>i</sup> pancreas; <sup>j</sup> normal breast. ND = Not determined due to insolubility in test vehicle.

**Table S2.** Percentage growth inhibition evaluation (% at 25 $\mu$ M, MTT assay, n = 3) of *Library 3* analogues **33-42** in a panel of cancer cell lines and MCF10A cells. Higher values indicate higher compound potency.

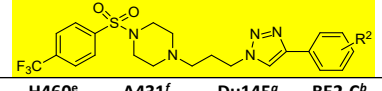

| Comp. (R <sup>2</sup> )                      | HT29 <sup>a</sup> | U87 <sup>b</sup> | MCF-7 <sup>c</sup> | A2780 <sup>d</sup> | H460 <sup>e</sup> | A431 <sup>f</sup> | Du145 <sup>g</sup> | BE2-C <sup>b</sup> | SJ-G2 <sup>h</sup> | MiaPaCa-2 <sup>i</sup> | MCF10A <sup>i</sup> |
|----------------------------------------------|-------------------|------------------|--------------------|--------------------|-------------------|-------------------|--------------------|--------------------|--------------------|------------------------|---------------------|
| <b>33</b> H                                  | 44±1              | 23±1             | 45±2               | 40±3               | 42±3              | 32±8              | <10                | 40±3               | 27±1               | 48±3                   | 50±2                |
| <b>34</b> 4-CH <sub>3</sub>                  | 91±2              | 57±5             | 96±1               | 78±2               | 78±4              | 85±3              | 74±8               | 78±2               | 83±5               | 76±3                   | 85±5                |
| <b>35</b> 4-CH <sub>2</sub> CH <sub>3</sub>  | 84±2              | 45±8             | 99±3               | 73±2               | 76±2              | 73±4              | 68±5               | 71±1               | 76±4               | 77±1                   | 83±3                |
| <b>36</b> 4-C(CH <sub>3</sub> ) <sub>3</sub> | 79±4              | 39±5             | 75±5               | 75±3               | 69±3              | 72±1              | 73±7               | 70±3               | 67±8               | 64±3                   | 83±3                |
| <b>37</b> 4-F                                | 59±6              | 30±2             | 69±9               | 55±9               | 57±8              | 49±15             | 49±12              | 54 ± 9             | 57±9               | 52±6                   | 61±1                |
| <b>38</b> 4-Br                               | 84±6              | 67±5             | 98±2               | 84±3               | 90±4              | 89±5              | 78±9               | 87±4               | 92±5               | 83±2                   | 92±4                |
| <b>39</b> 3-Cl                               | 71±2              | 29±4             | 75±0               | 57±5               | 56±0              | 51±6              | 41±5               | 61±1               | 58±1               | 62±1                   | 67±3                |
| <b>40</b> 4-CF <sub>3</sub>                  | 73±5              | 74±5             | 90±5               | 78±5               | 90±5              | 83±7              | 91±8               | 82±6               | 88±2               | 72±7                   | 87±3                |
| <b>41</b> 4-NO <sub>2</sub>                  | 41±0              | 13±5             | 84±4               | 43±6               | 47±2              | 27±1              | 34±2               | 48±8               | 30±2               | 58±5                   | 52±17               |
| <b>42</b> 4-N(CH <sub>3</sub> ) <sub>2</sub> | 52±3              | 14±0             | 60±4               | 53±1               | 58±0              | 47±12             | 50±2               | 48±1               | 70±30              | 42±1                   | 61±3                |

<sup>a</sup> colon; <sup>b</sup> glioblastoma; <sup>c</sup> breast; <sup>d</sup> ovarian; <sup>e</sup> lung; <sup>f</sup> skin; <sup>g</sup> prostate; <sup>h</sup> neuroblastoma; <sup>i</sup> pancreas; <sup>j</sup> normal breast

**Table S3.** Percentage growth inhibition evaluation (% at 25 $\mu$ M, MTT assay, n = 3) of *Library 3* analogues **33-36** and **38-41** in an expanded Pancreatic Cancer cell line panel. Higher values indicate higher compound potency.

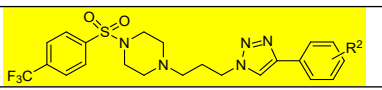

| Comp. (R <sup>2</sup> )                      | BxPC-3  | AsPC-1 | Capan-2 | HPAC   | PANC-1 |
|----------------------------------------------|---------|--------|---------|--------|--------|
| <b>33</b> H                                  | 34 ± 1  | 37 ± 1 | 23 ± 22 | 4 ± 11 | 50 ± 2 |
| <b>34</b> 4-CH <sub>3</sub>                  | 96 ± 1  | 77 ± 1 | 91 ± 4  | 93 ± 4 | 70 ± 1 |
| <b>35</b> 4-CH <sub>2</sub> CH <sub>3</sub>  | 48 ± 3  | 12 ± 4 | 18 ± 9  | 15 ± 6 | <0     |
| <b>36</b> 4-C(CH <sub>3</sub> ) <sub>3</sub> | 95 ± 3  | 74 ± 1 | 83 ± 4  | 81 ± 2 | 63 ± 2 |
| <b>38</b> 3-Cl                               | 19 ± 20 | 42 ± 6 | 32 ± 11 | 20 ± 9 | 49 ± 6 |
| <b>39</b> 4-Br                               | 97 ± 1  | 79 ± 7 | 94 ± 15 | 92 ± 5 | 83 ± 7 |
| <b>40</b> 4-CF <sub>3</sub>                  | 78 ± 6  | 60 ± 2 | 76 ± 11 | 89 ± 5 | 66 ± 6 |
| <b>41</b> 4-NO <sub>2</sub>                  | 37 ± 0  | 22 ± 4 | 28 ± 19 | <0     | 34 ± 0 |

*N*-(4-((4-(3-(4-(3-Methoxyphenyl)-1*H*-1,2,3-triazol-1-yl)propyl)piperazin-1-yl)-sulfonyl)phenyl)acetamide (**2**)

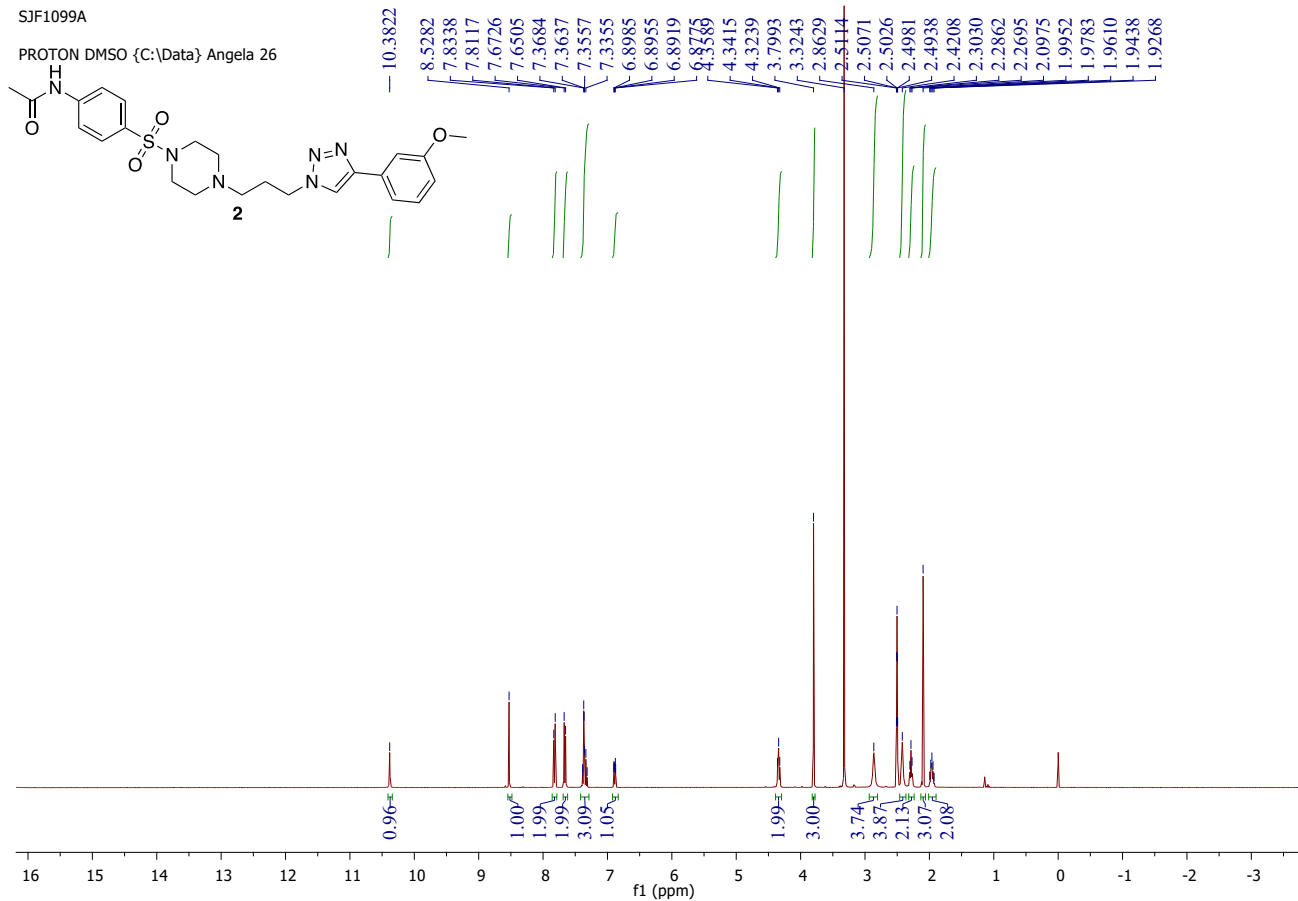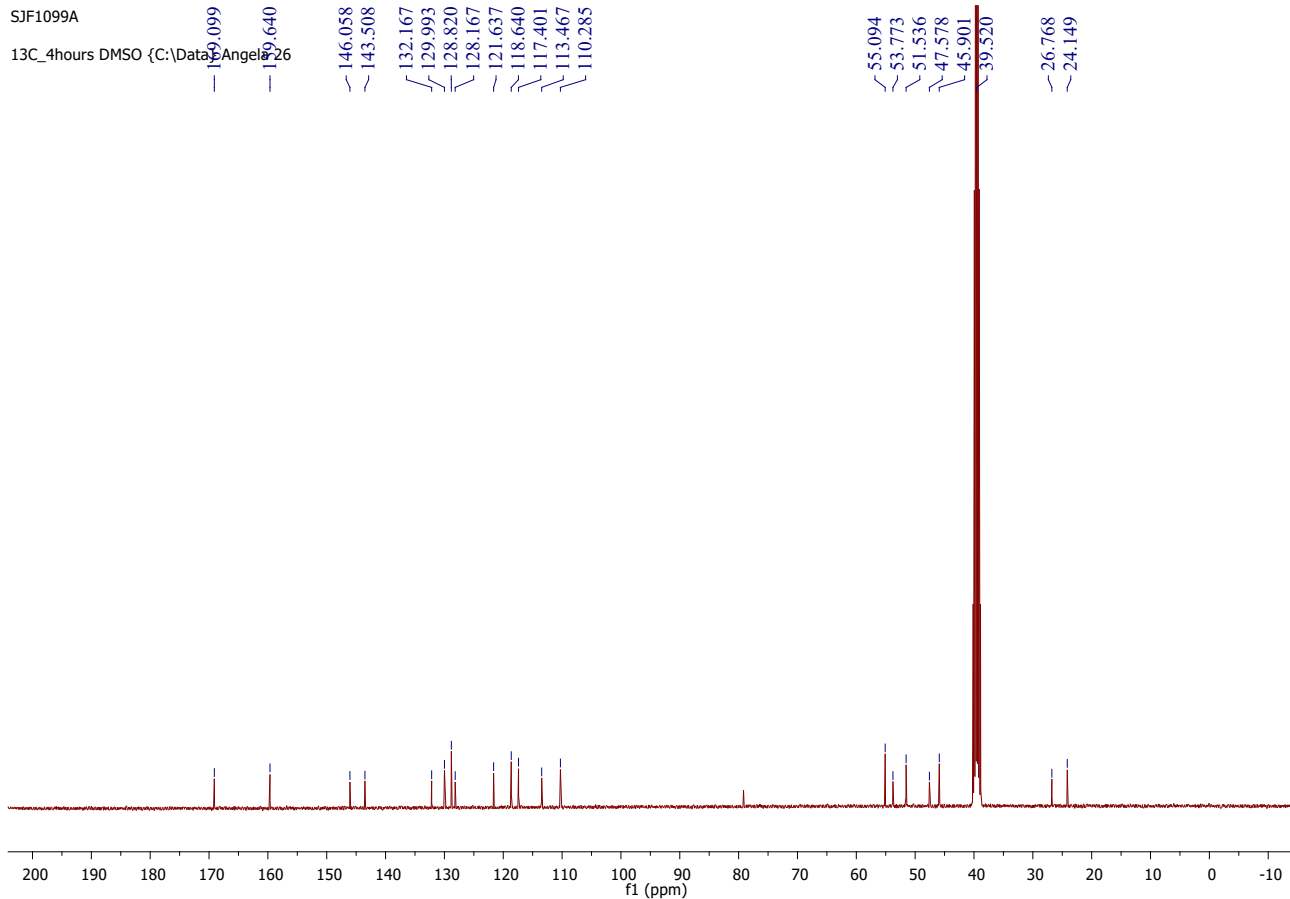

1-(3-(4-(3-Methoxyphenyl)-1H-1,2,3-triazol-1-yl)propyl)-4-(phenylsulfonyl)-piperazine benzene sulfonate (**14**)

SJF1079A

PROTON HDMSO {C:\Data} Angela 36

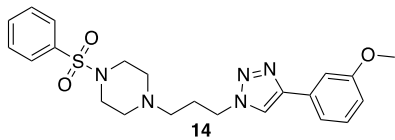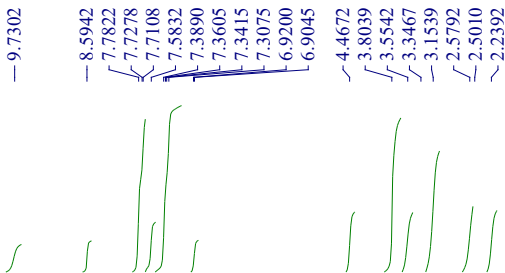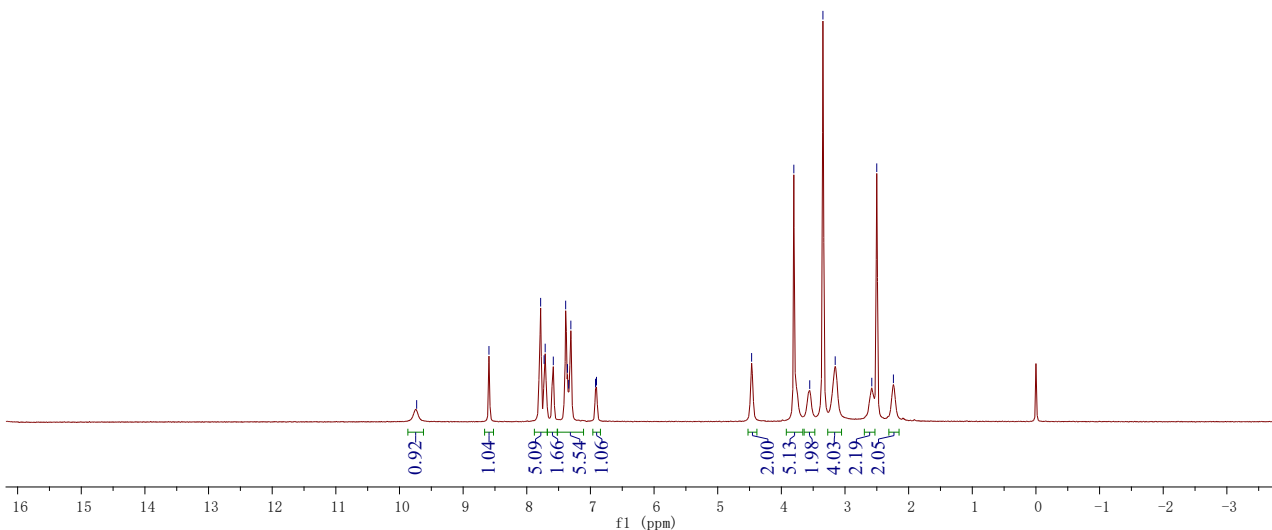

SJF1079

13C\_30min DMSO {C:\Data} Angela 36

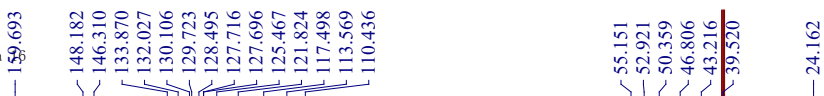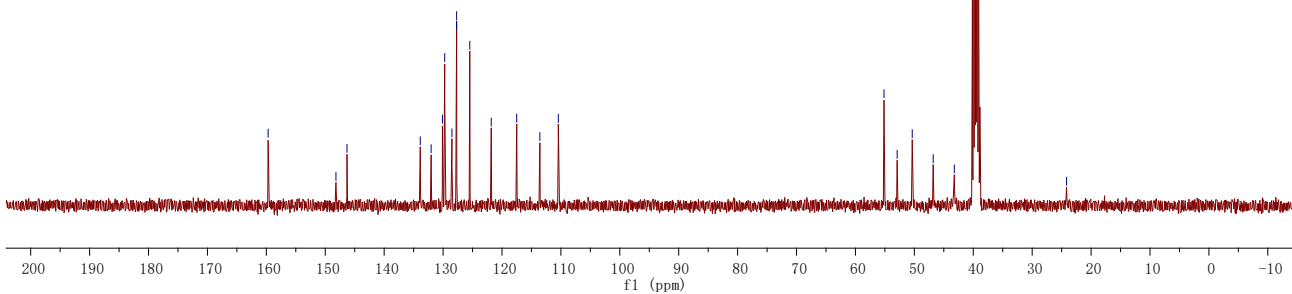

1-(3-(4-(3-Methoxyphenyl)-1H-1,2,3-triazol-1-yl)propyl)-4-tosylpiperazine (15)

SJF1093

PROTON DMSO {C:\Data} Angela 17

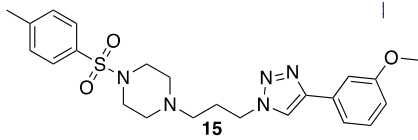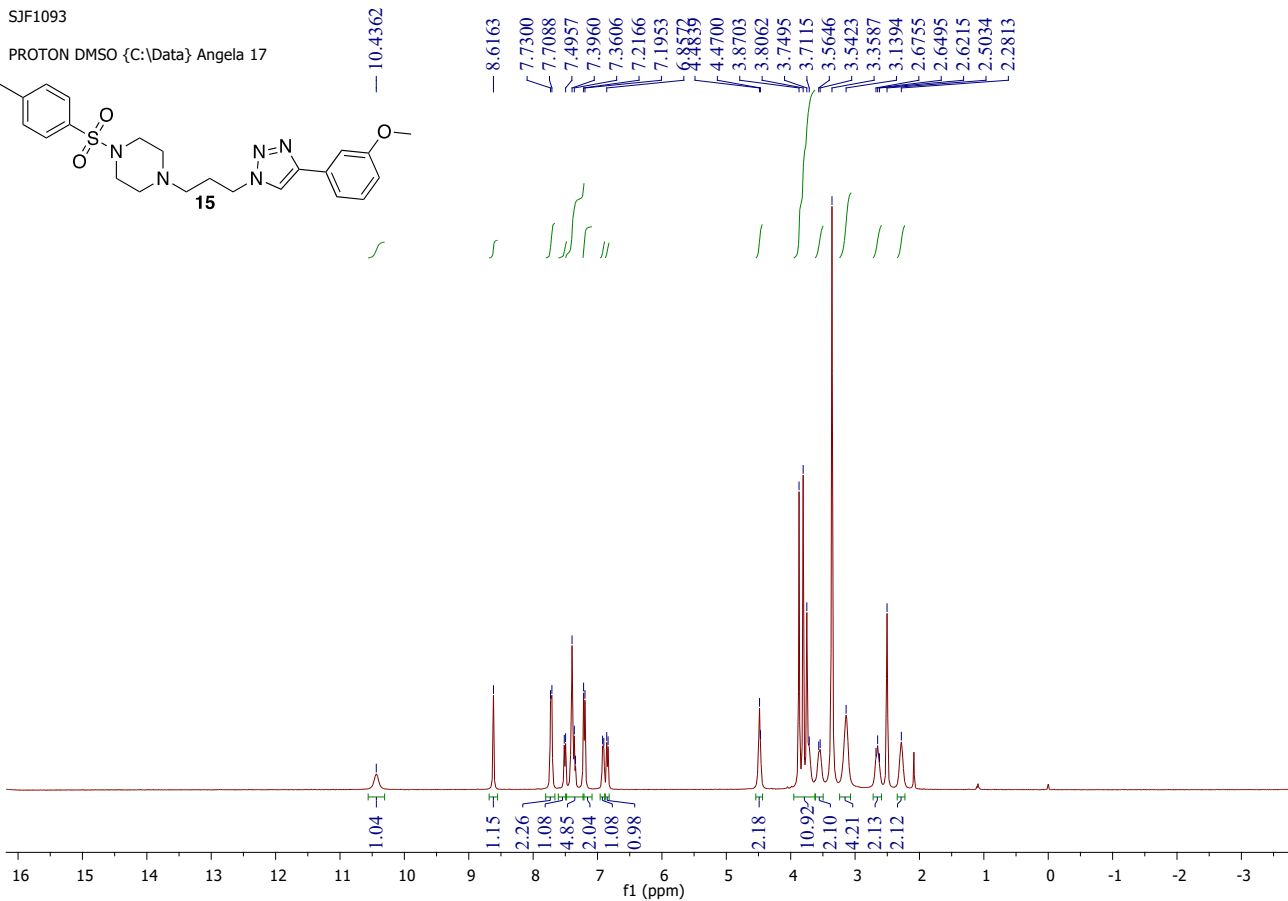

SJF1093

13C\_4hours DMSO {C:\Data} Angela 17

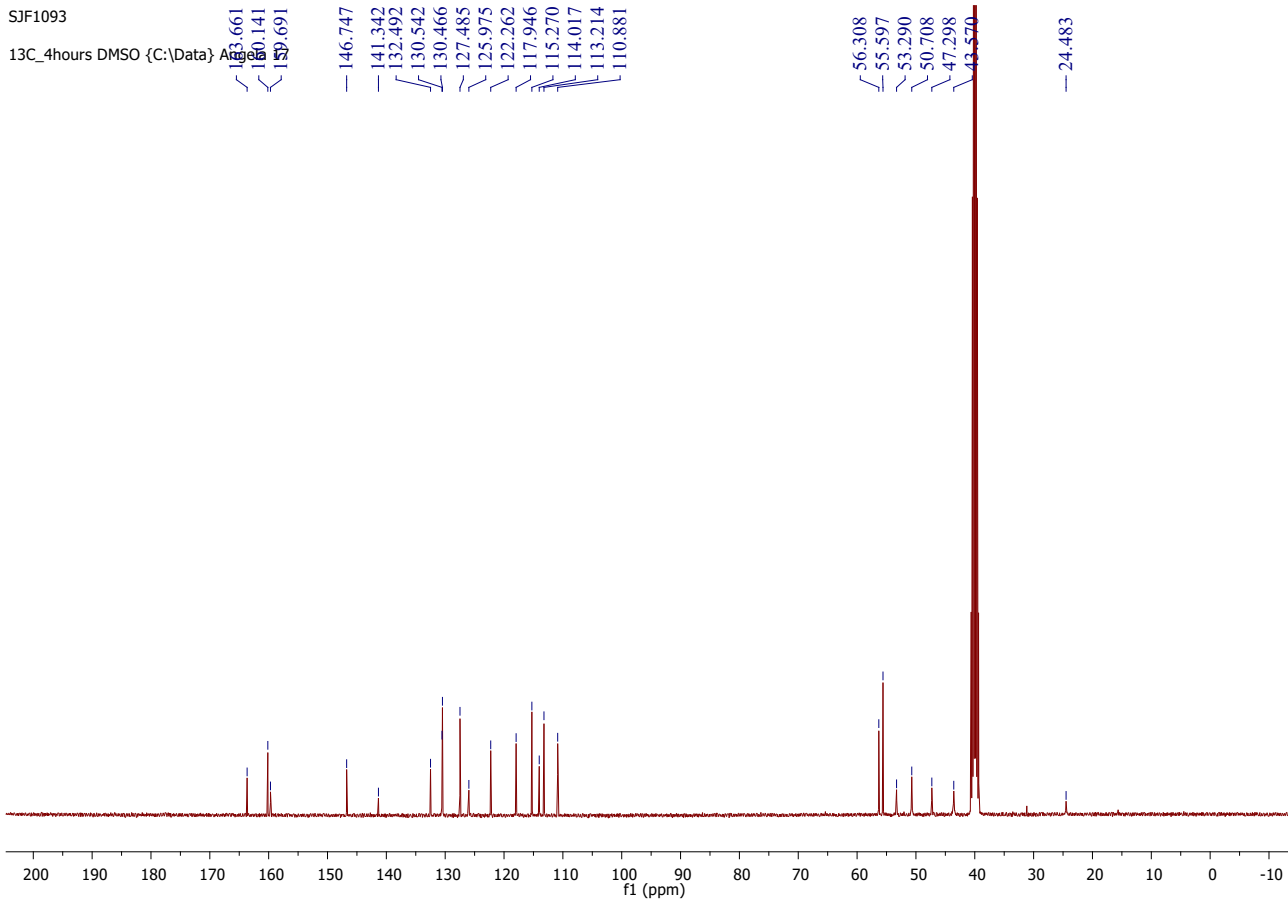

1-(4-Isopropylphenylsulfonyl)-4-(3-(4-(3-methoxyphenyl)-1H-1,2,3-triazol-1-yl)-propyl) piperazine hydrochloride (**16**)

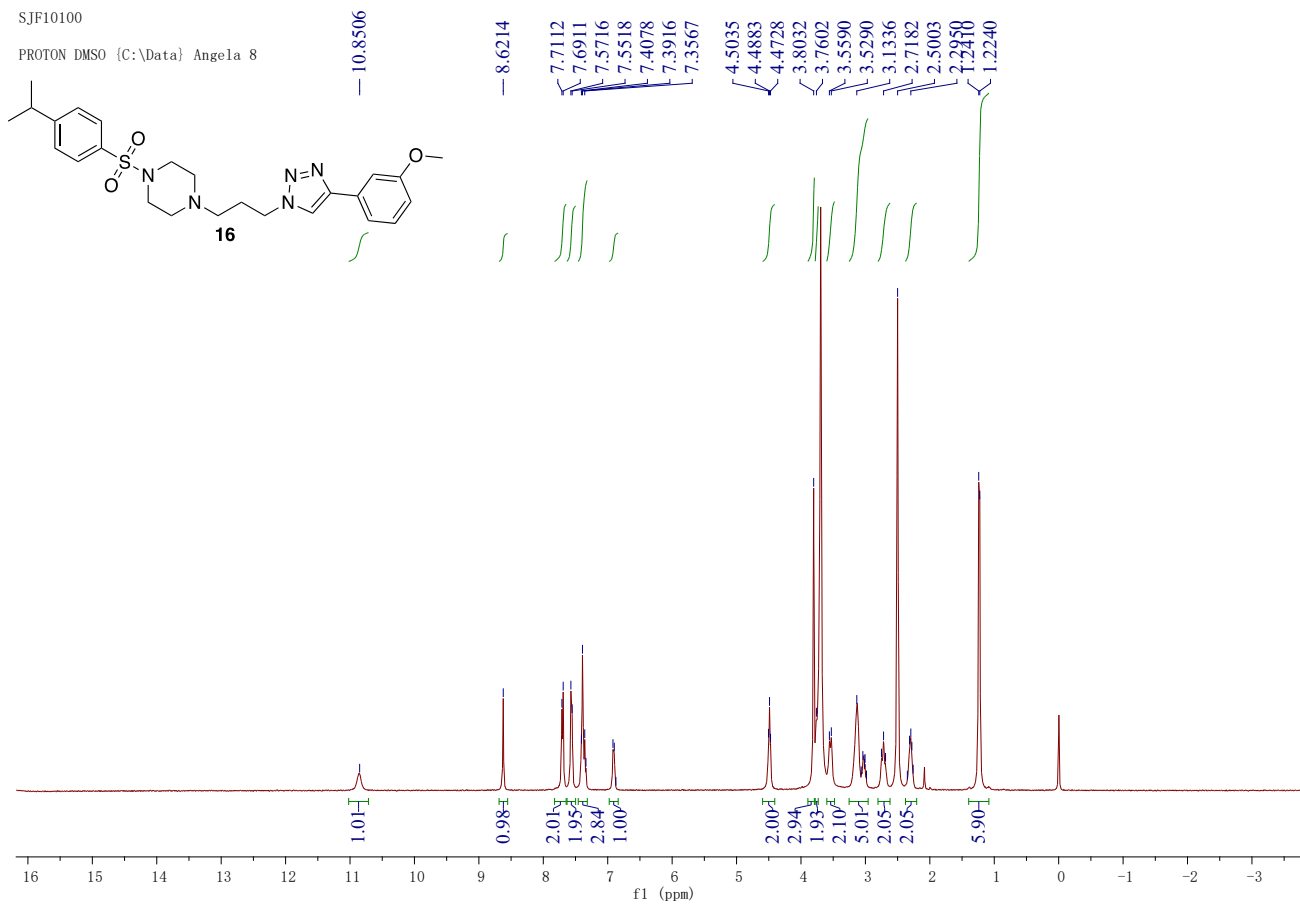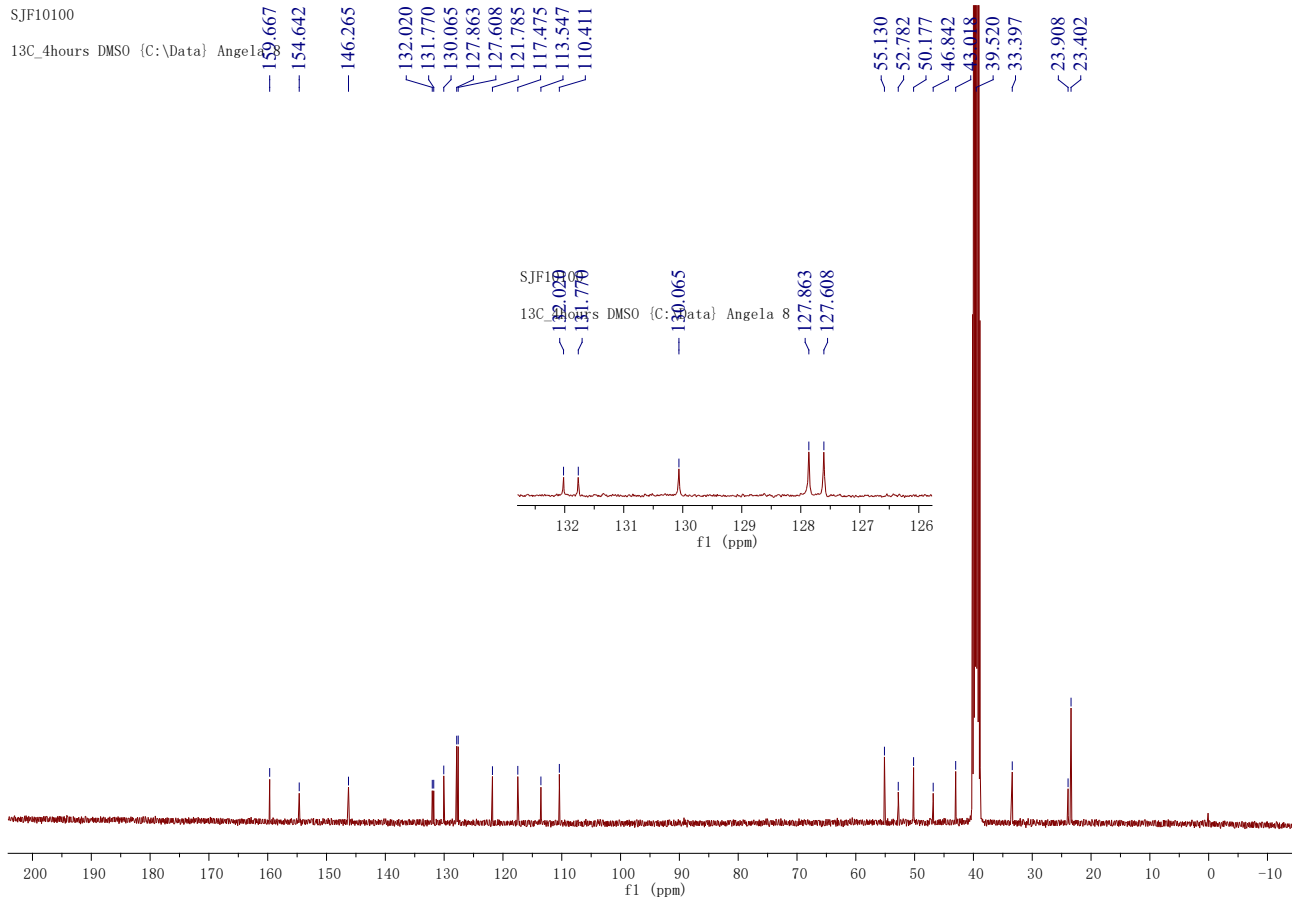

1-((4-(tert-Butyl)phenyl)sulfonyl)-4-(3-(4-(3-methoxyphenyl)-1H-1,2,3-triazol-1-yl)propyl)piperazine hydrochloride (**17**)

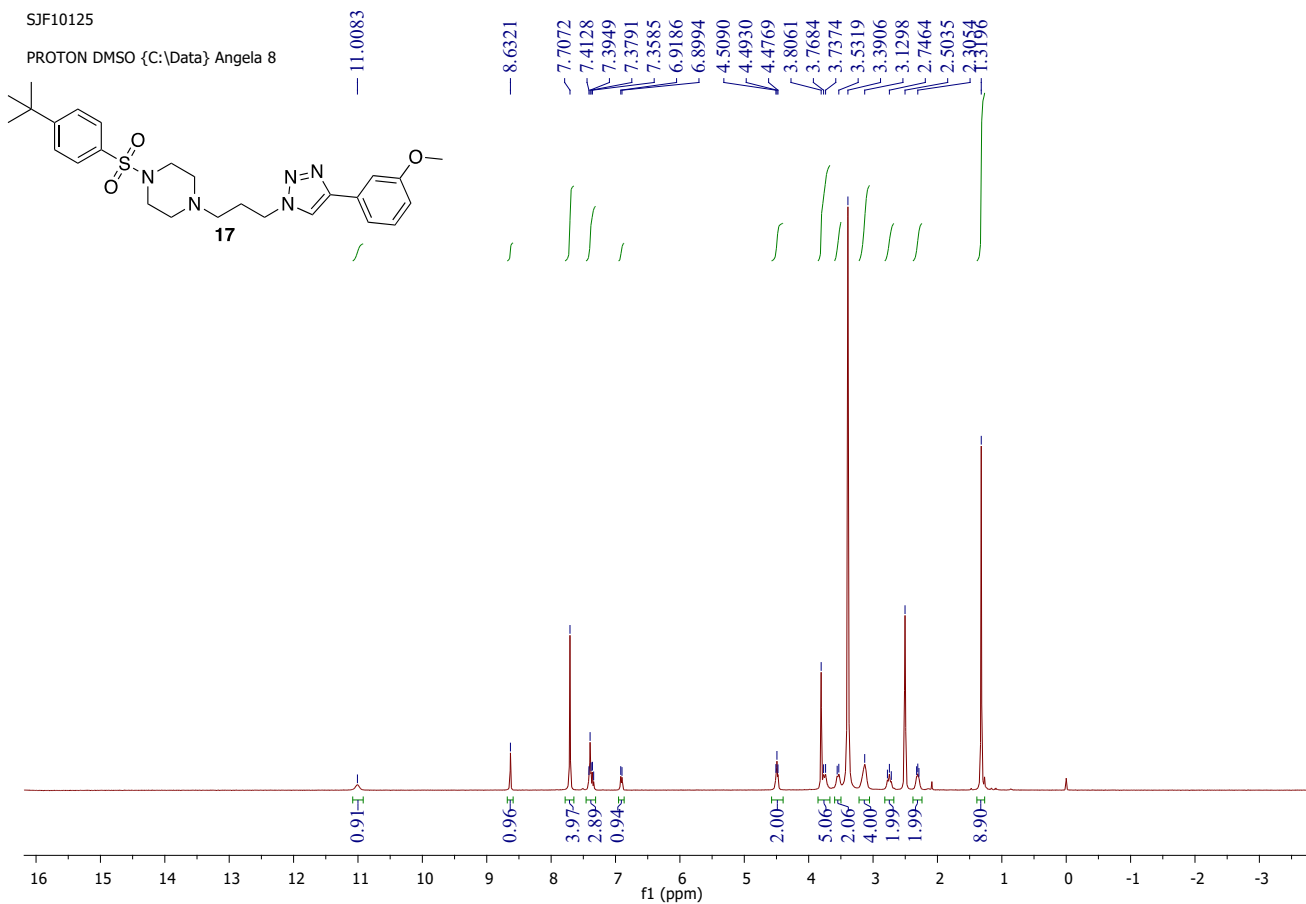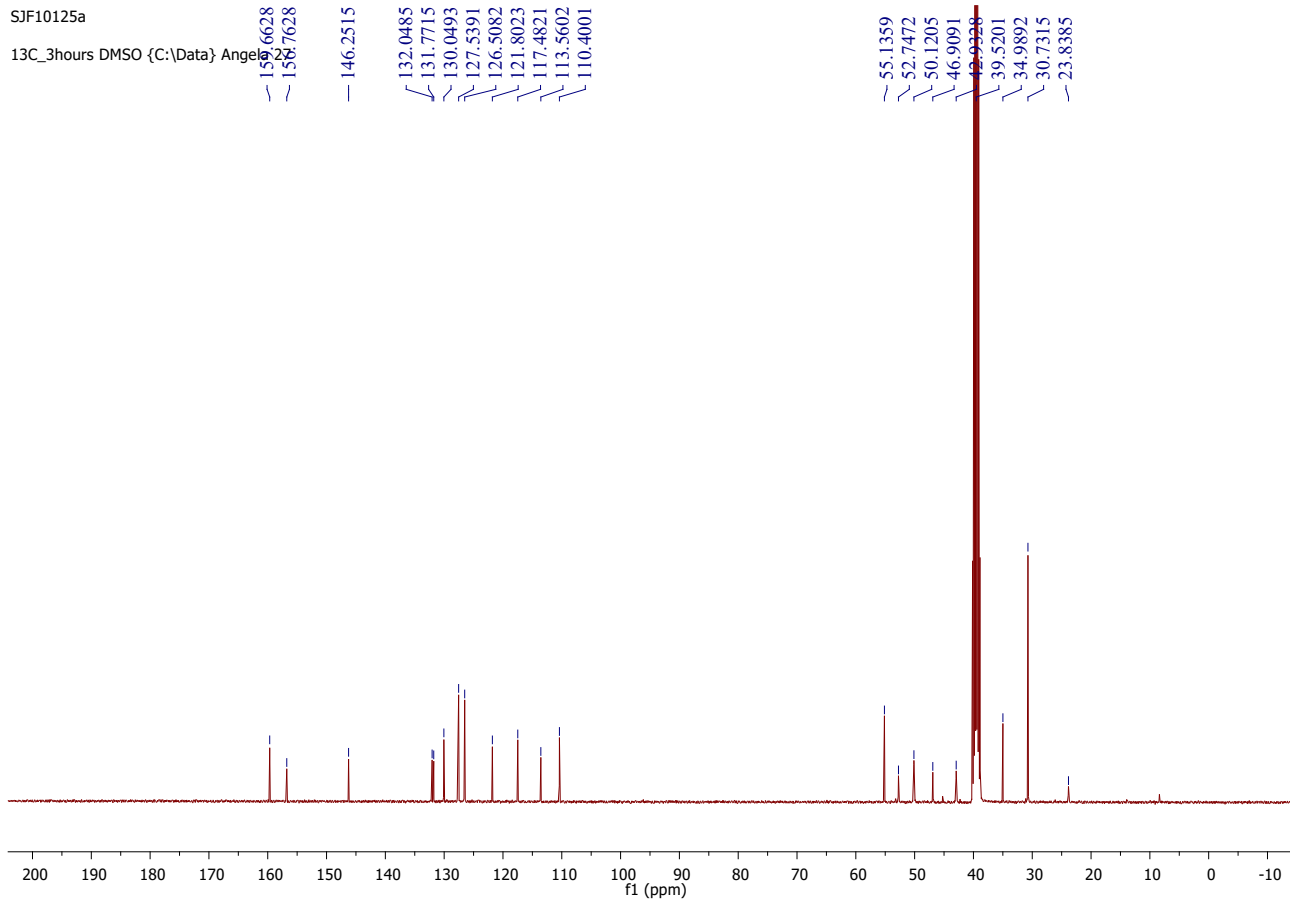



1-(3-(4-(3-Methoxyphenyl)-1H-1,2,3-triazol-1-yl)propyl)-4-((4-methoxyphenyl)-sulfonyl)piperazine 4-methoxy benzenesulfonate (**18**)

SJF1095

PROTON DMSO (C:\Data) Angela 19

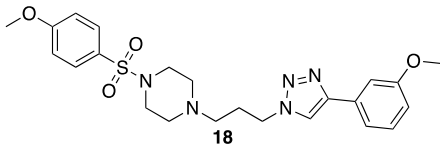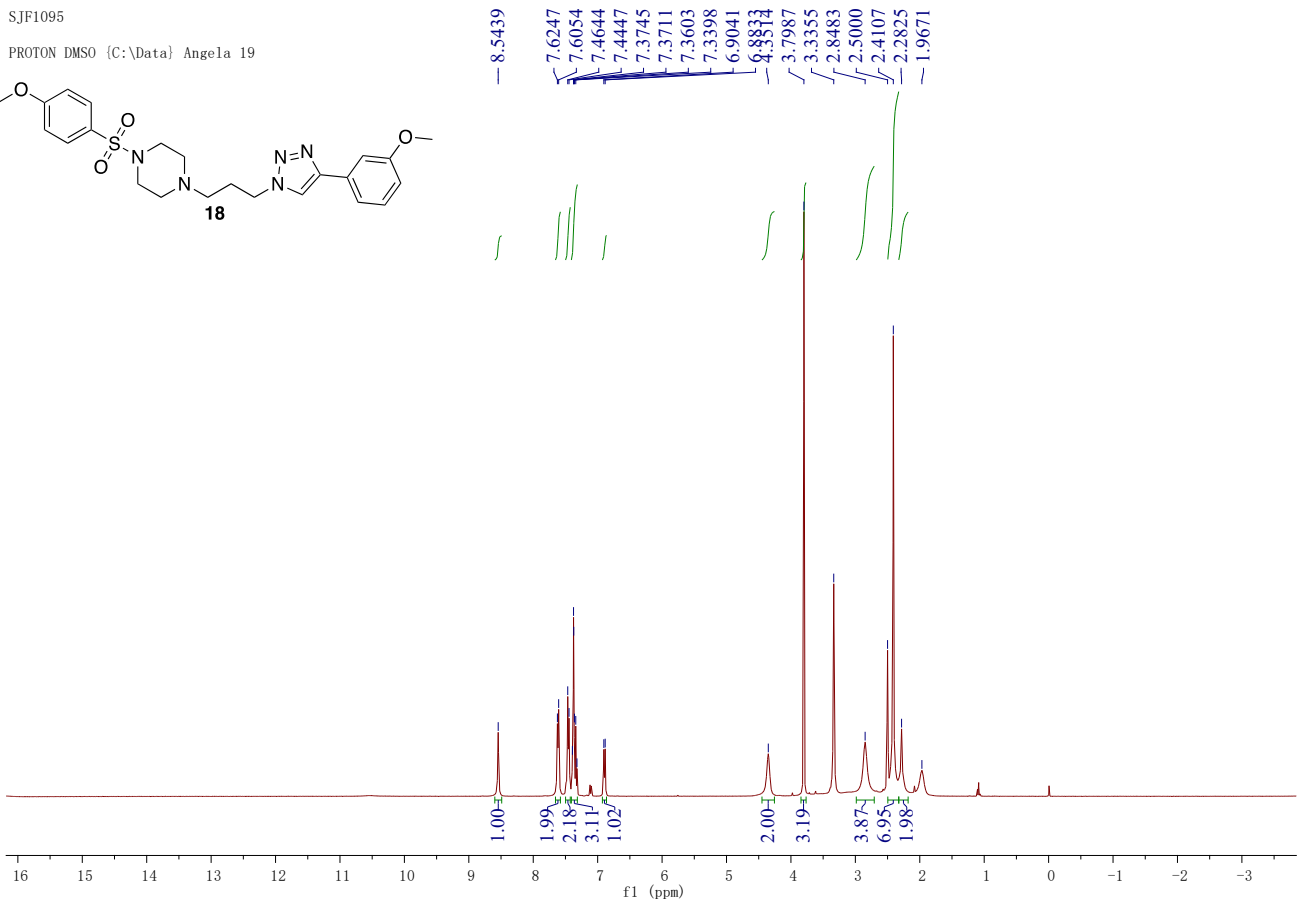

SJF1095

13C\_4hours DMSO (C:\Data) Angel

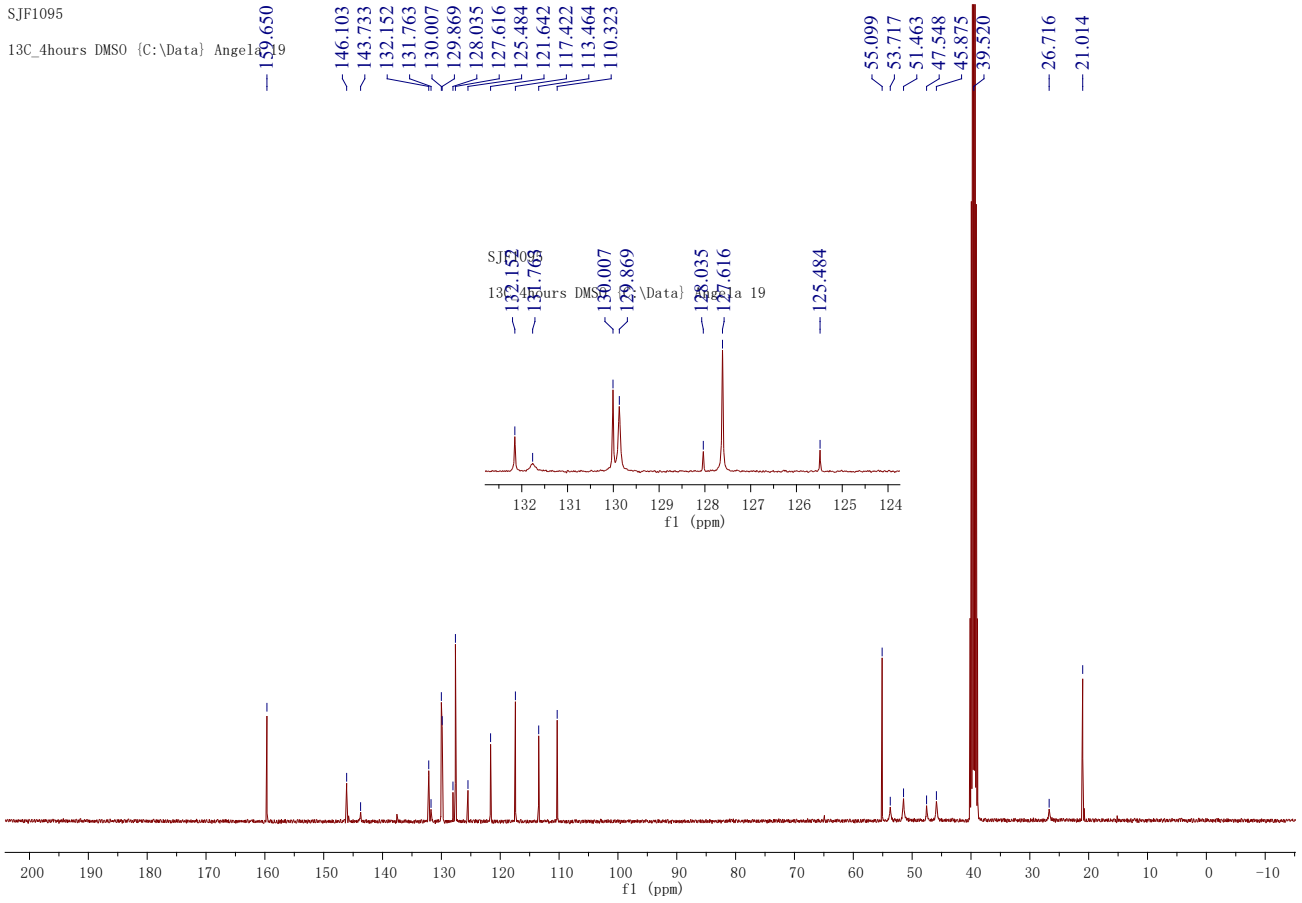

1-((4-Fluorophenyl)sulfonyl)-4-(3-(4-(3-methoxyphenyl)-1H-1,2,3-triazol-1-yl)-propyl)piperazine hydrochloride (19)

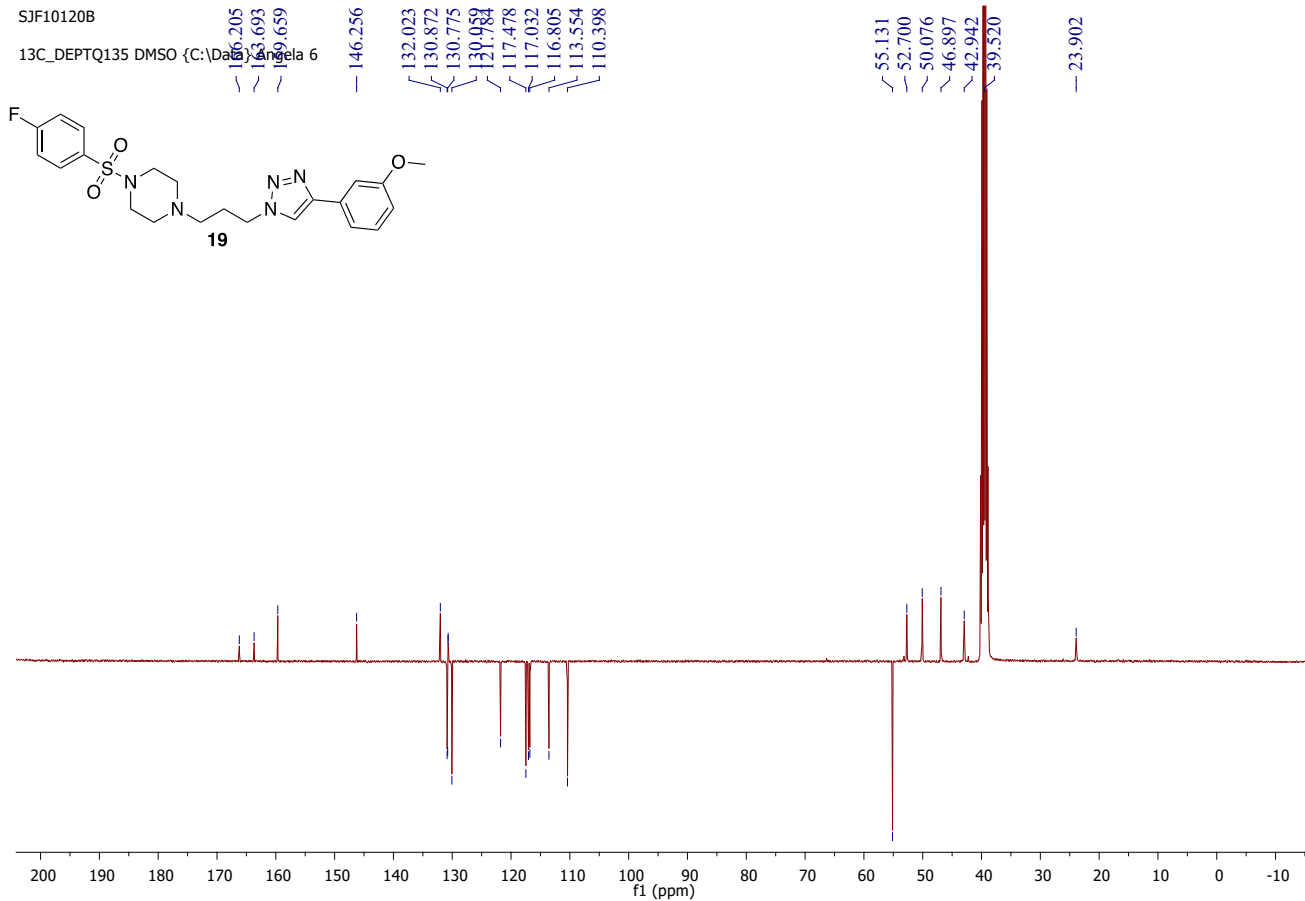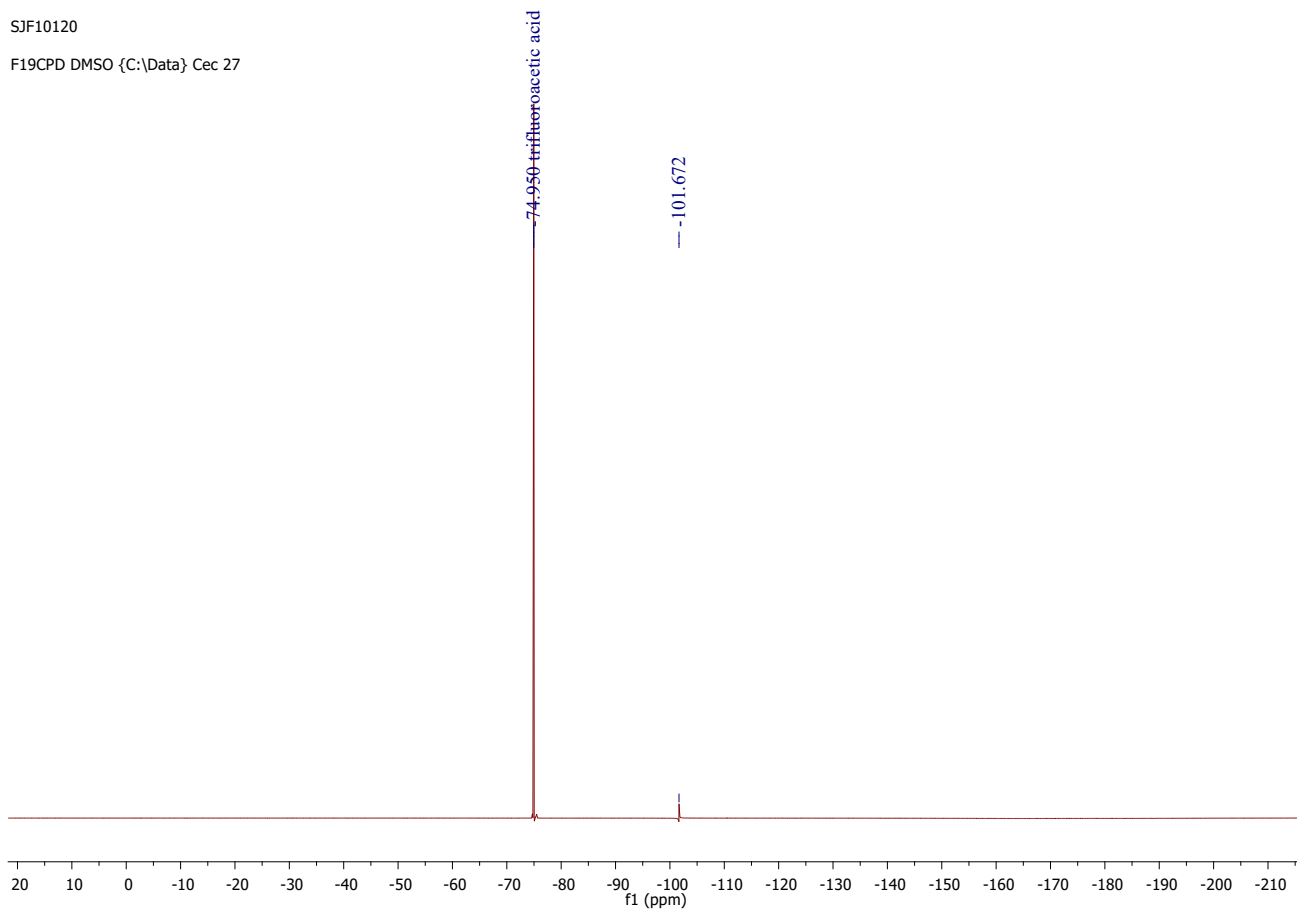

1-((4-Chlorophenyl)sulfonyl)-4-(3-(4-(3-methoxyphenyl)-1H-1,2,3-triazol-1-yl)-propyl)piperazine (20)

SJF10104

PROTON DMSO {C:\Data} Angela 26

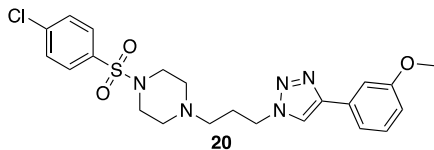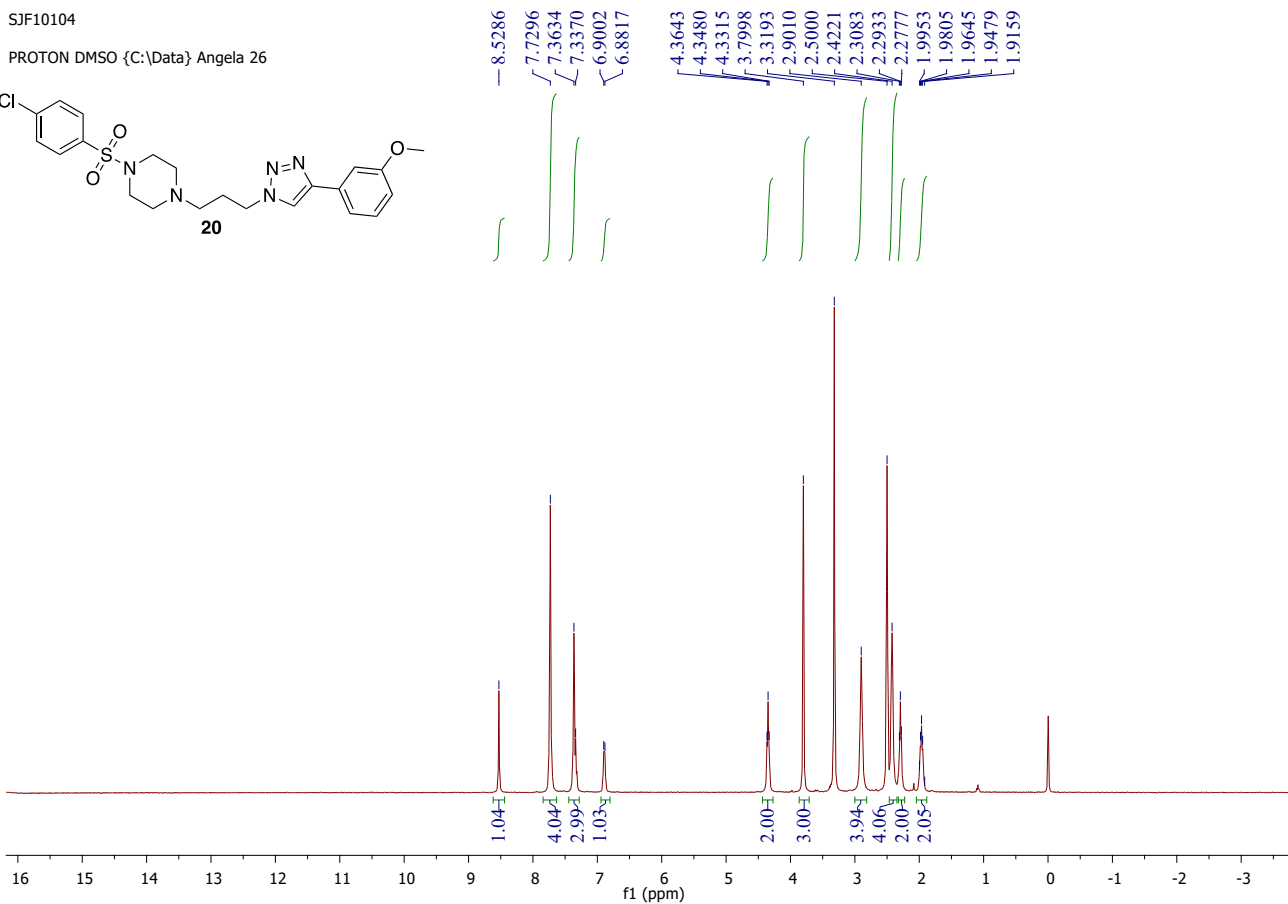

SJF10104

13C\_4hours DMSO {C:\Data} Angela 26

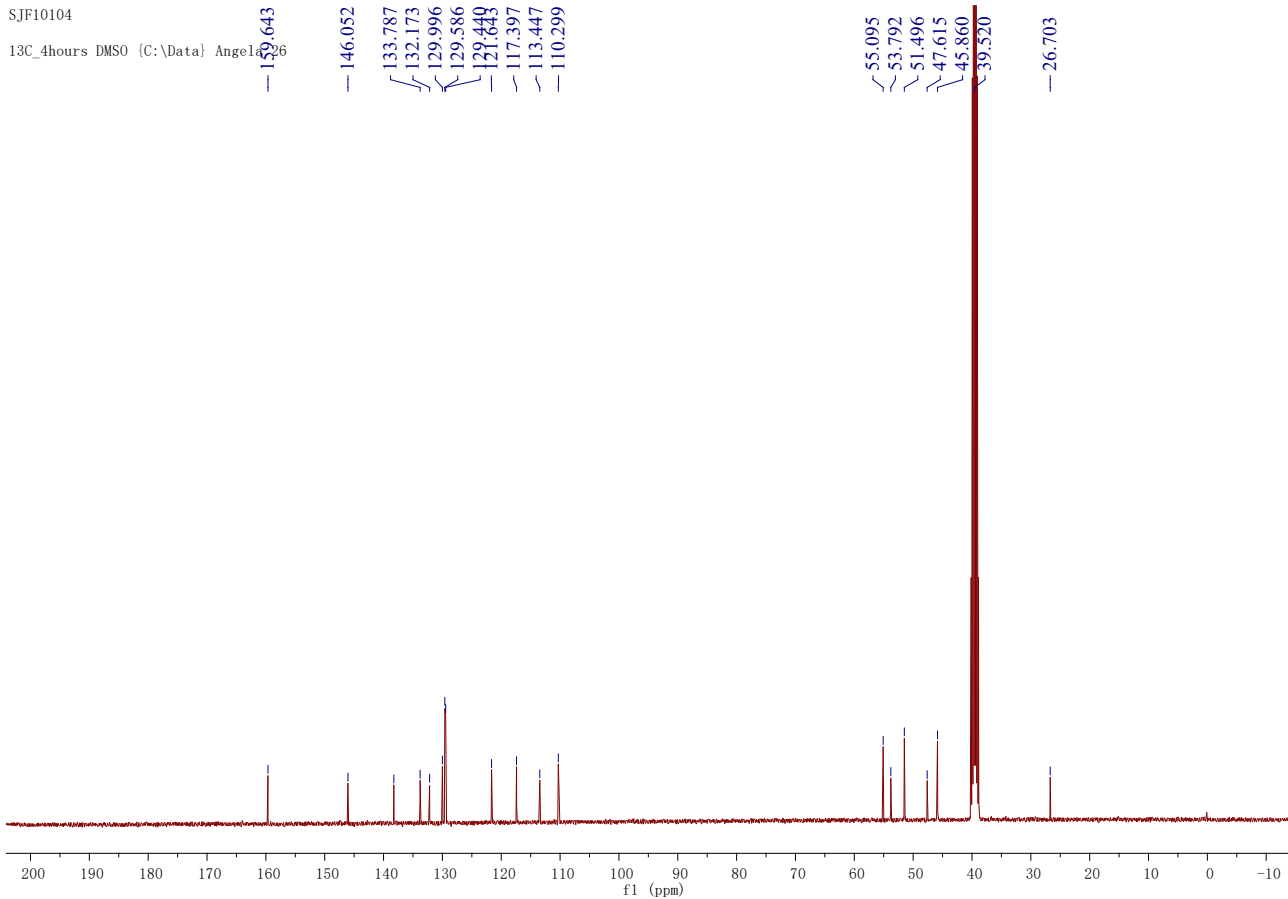

1-((4-Bromophenyl)sulfonyl)-4-(3-(4-(3-methoxyphenyl)-1H-1,2,3-triazol-1-yl) propyl)piperazine (21)

SJF1094

PROTON DMSO {C:\Data} Angela 18

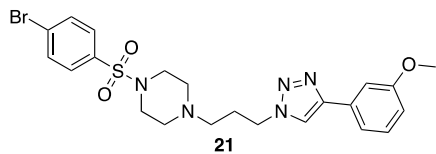

8.5296  
7.8709  
7.8499  
7.6657  
7.6447  
7.3699  
7.3669  
7.3582  
7.3377  
7.3186  
6.9015  
6.8816  
4.3659  
4.3490  
4.3321  
3.7997  
3.3336  
2.8959  
2.5001  
2.4191  
2.2895  
1.9801  
1.9641  
1.9478

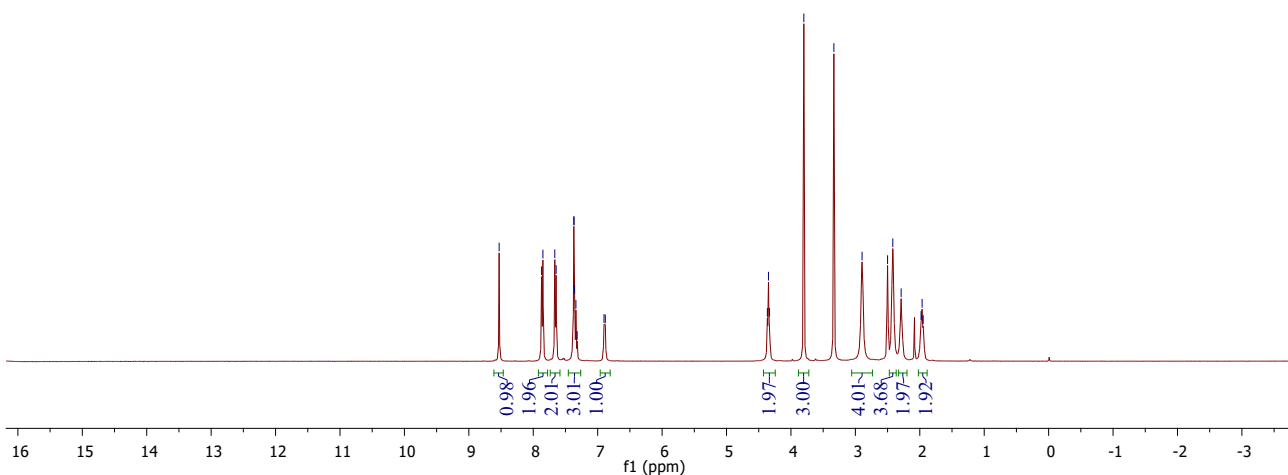

SJF1094

13C\_4hours DMSO {C:\Data} Angela 18

129.646  
146.065  
134.174  
132.525  
132.173  
130.000  
129.501  
127.299  
121.644  
117.407  
113.449  
110.313  
55.097  
53.774  
51.490  
47.600  
45.852  
39.520  
26.709

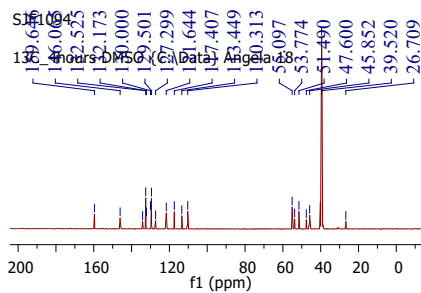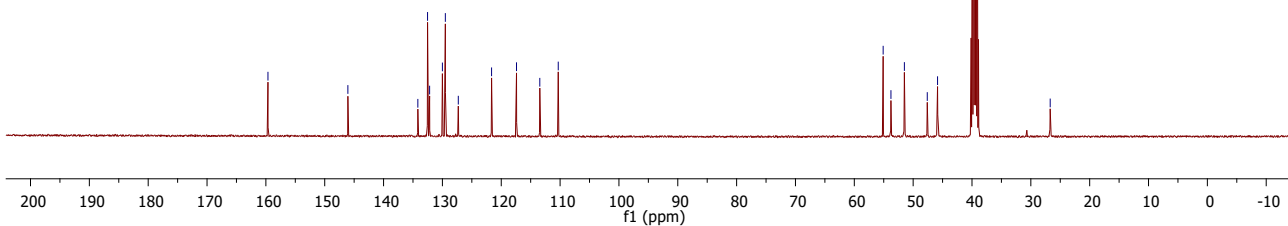

1-(3-(4-(3-Methoxyphenyl)-1H-1,2,3-triazol-1-yl)propyl)-4-((4-(trifluoromethyl)phenyl)sulfonyl) piperazine (**22**)

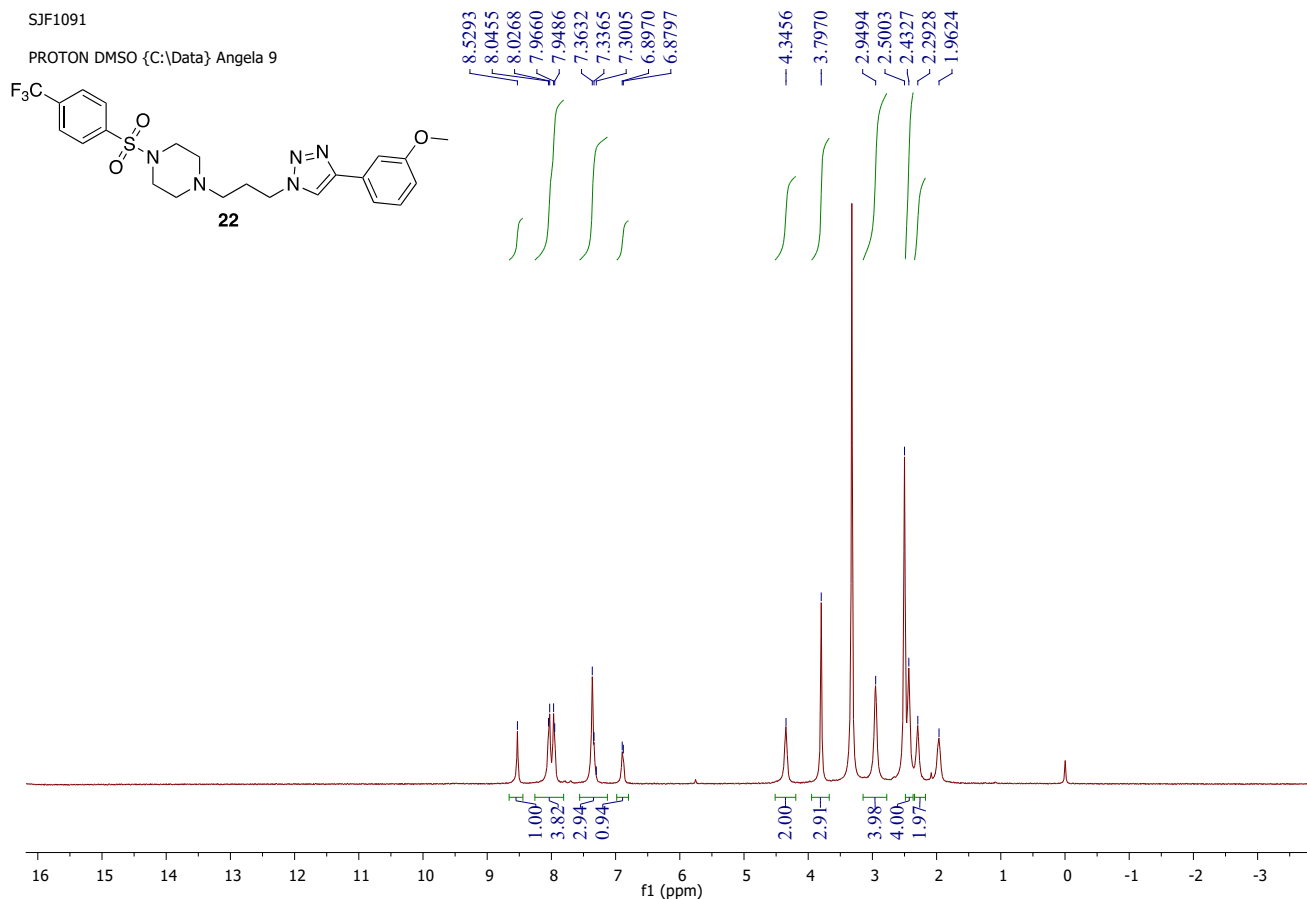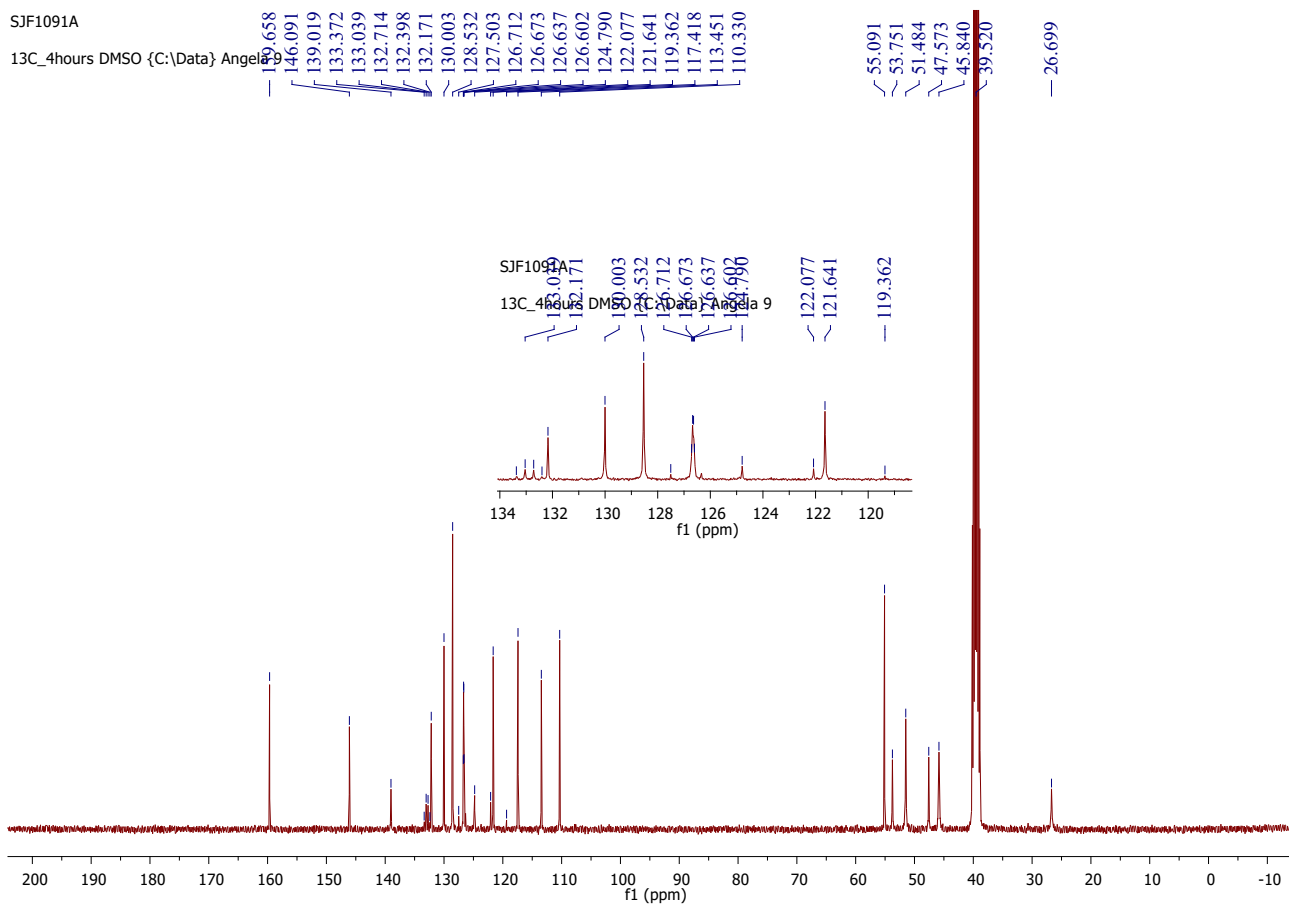

SJF1091

F19CPD DMSO {C:\Data} Cec 13

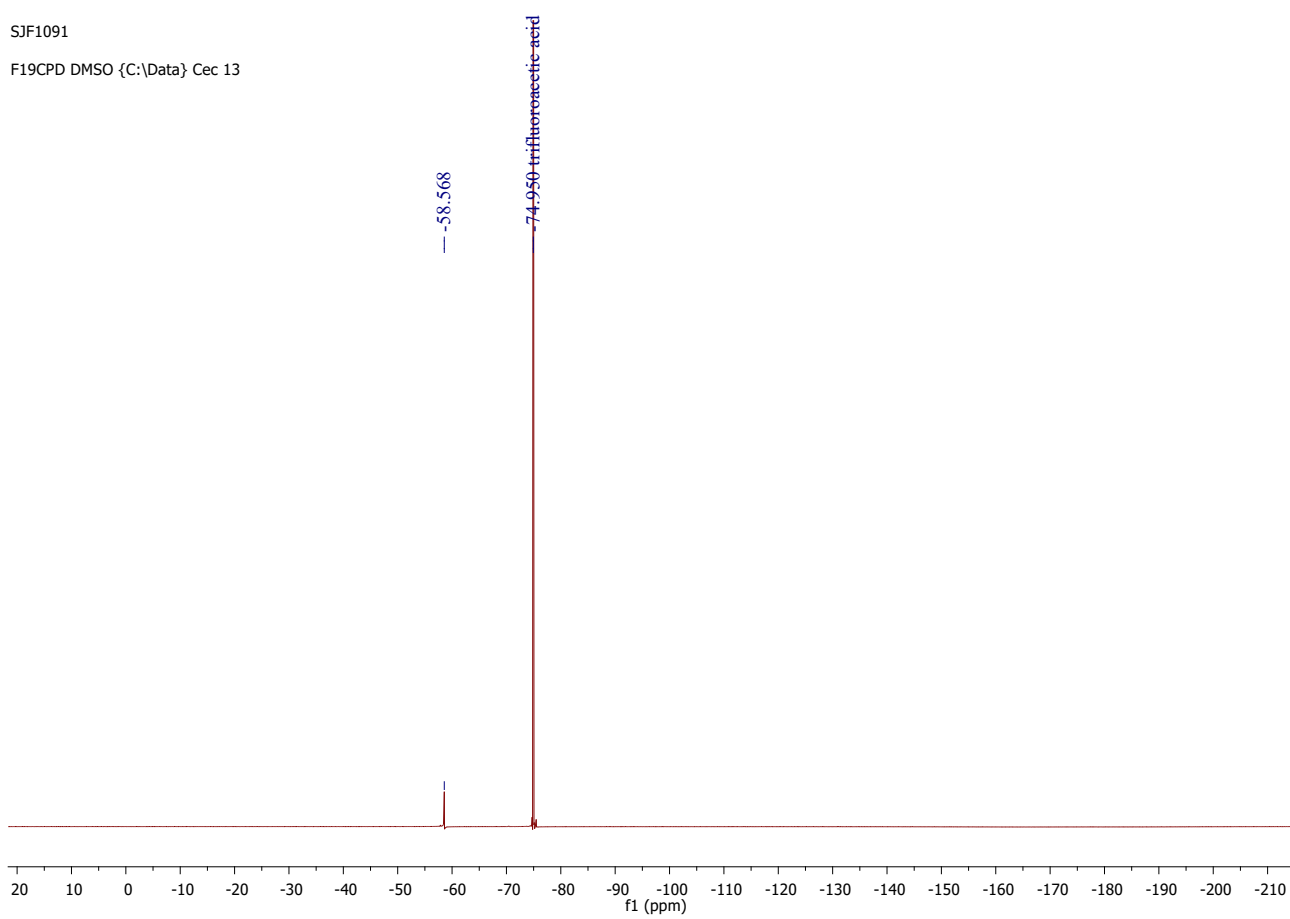

1-(3-(4-(3-Methoxyphenyl)-1H-1,2,3-triazol-1-yl)propyl)-4-((4-nitrophenyl)-sulfonyl)piperazine hydrochloride (**23**)

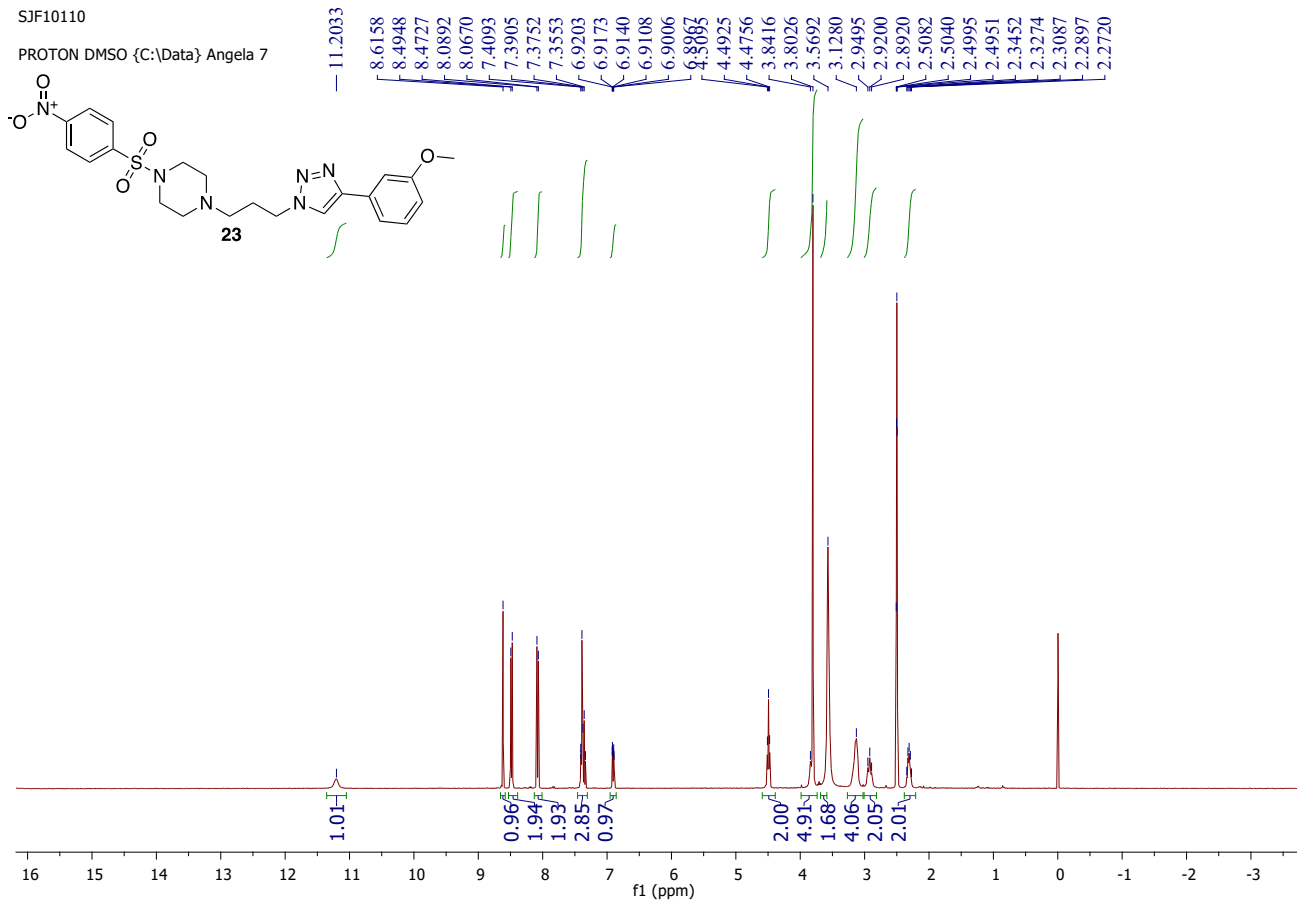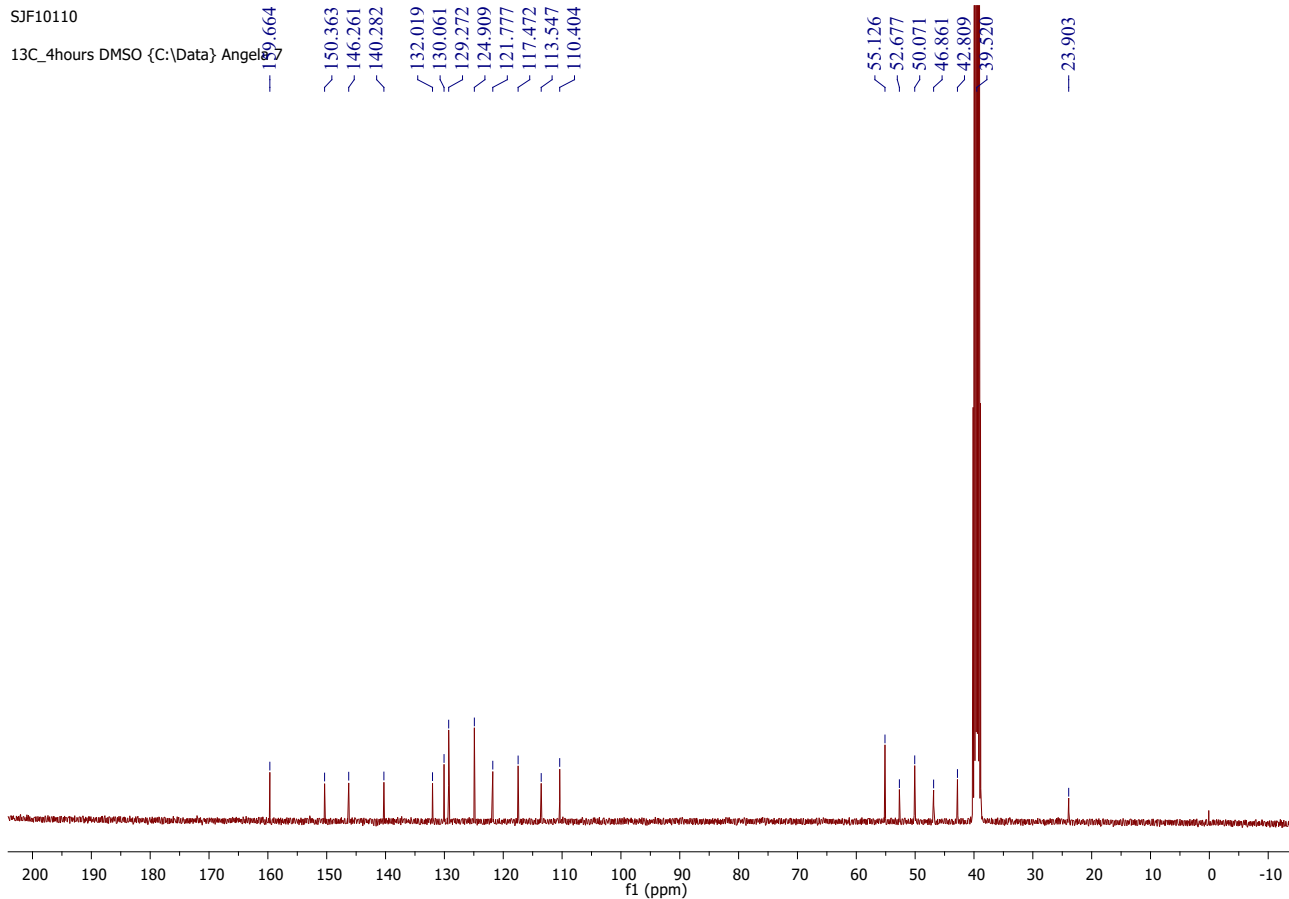



1-(4-((4-(3-(4-(3-Methoxyphenyl)-1H-1,2,3-triazol-1-yl)propyl)piperazin-1-yl)-sulfonyl)phenyl)ethanone hydrochloride  
(24)

SJF10112

PROTON DMSO {C:\Data} Angela 10

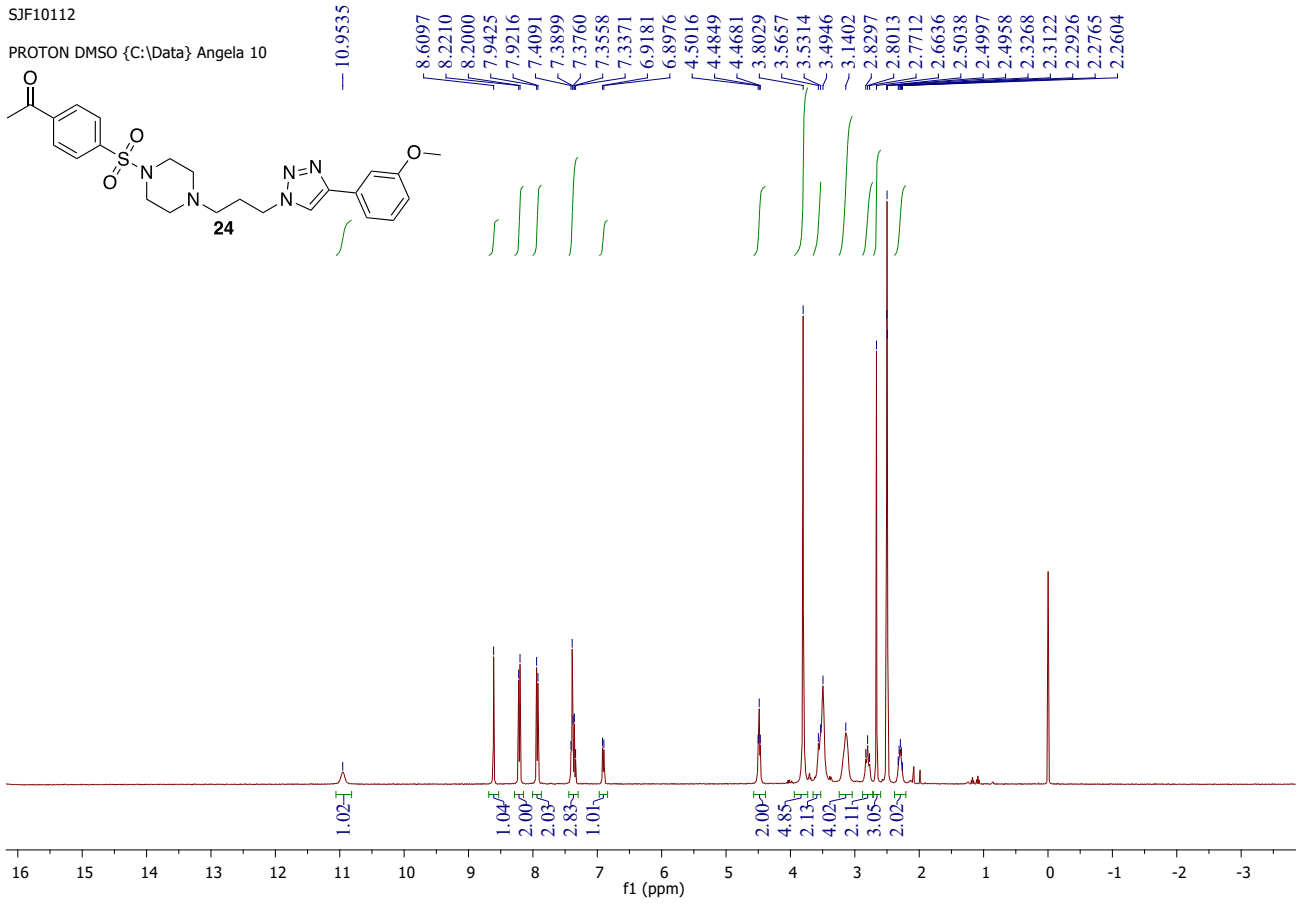

SJF10112

13C hours DMSO (C:\Data) Angel

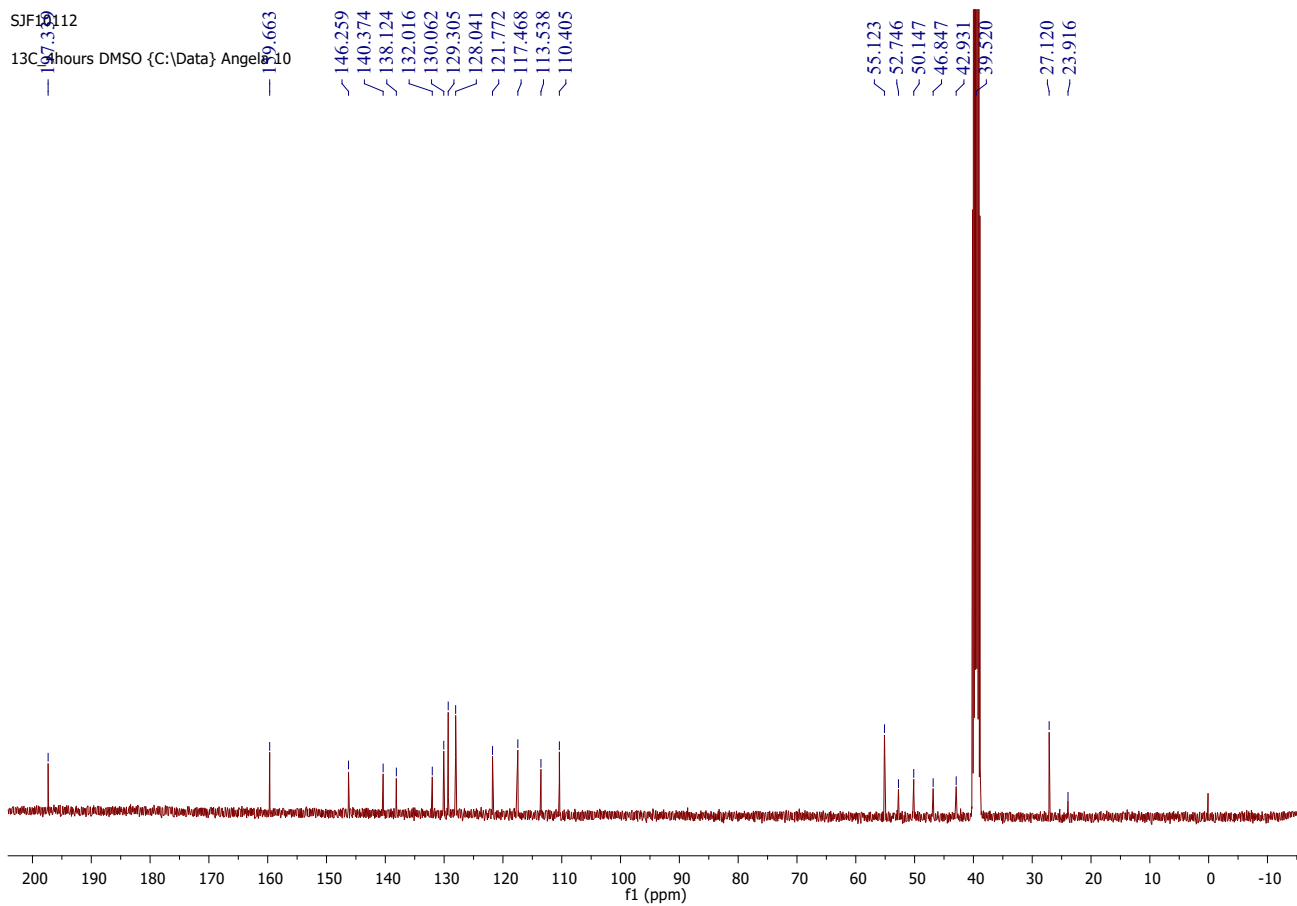

*N*-(4-{4-[3-(4-Phenyl-[1,2,3]triazol-1-yl)-propyl]-piperazine-1-sulfonyl}-phenyl)-acetamide hydrochloride (**25**)

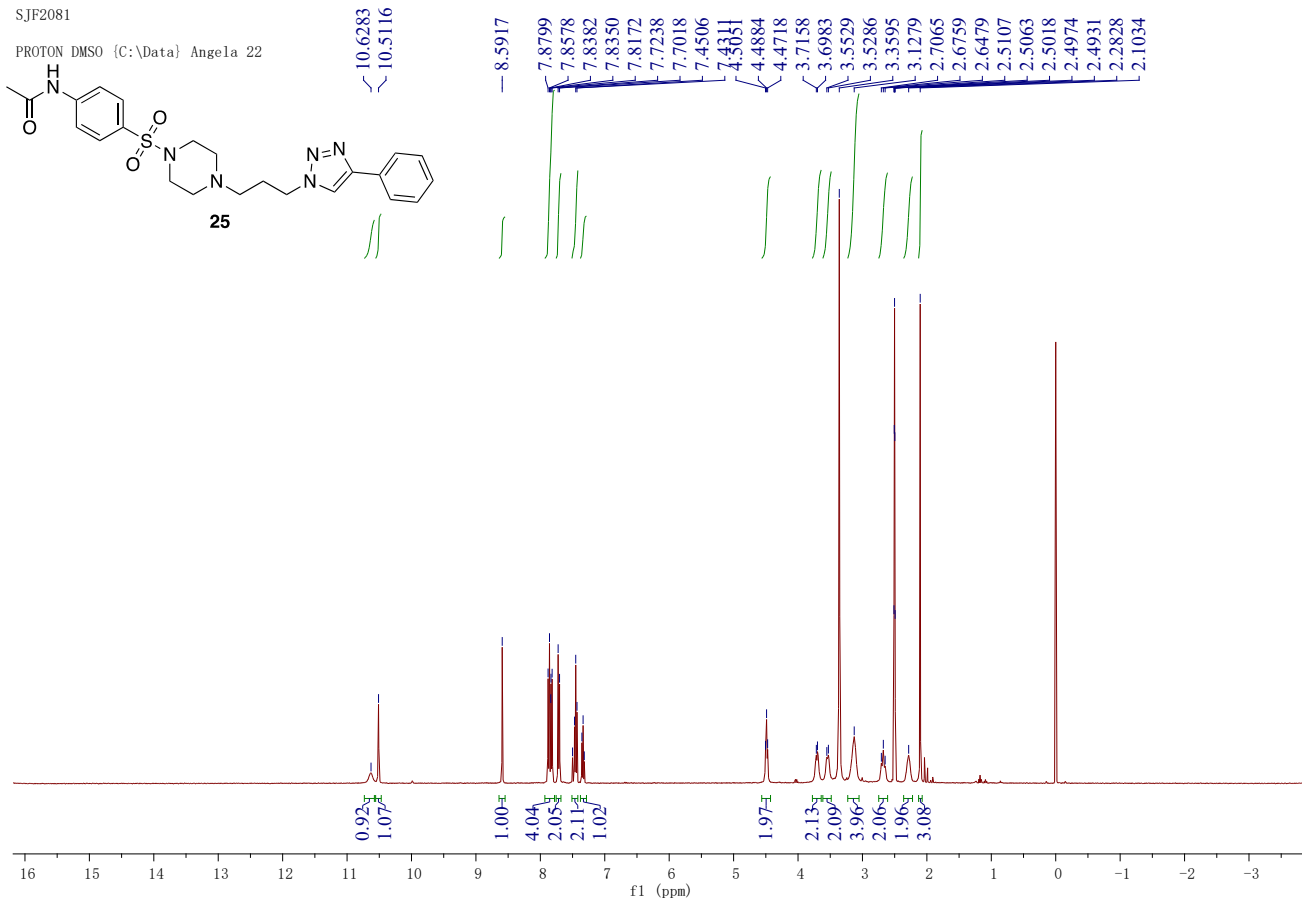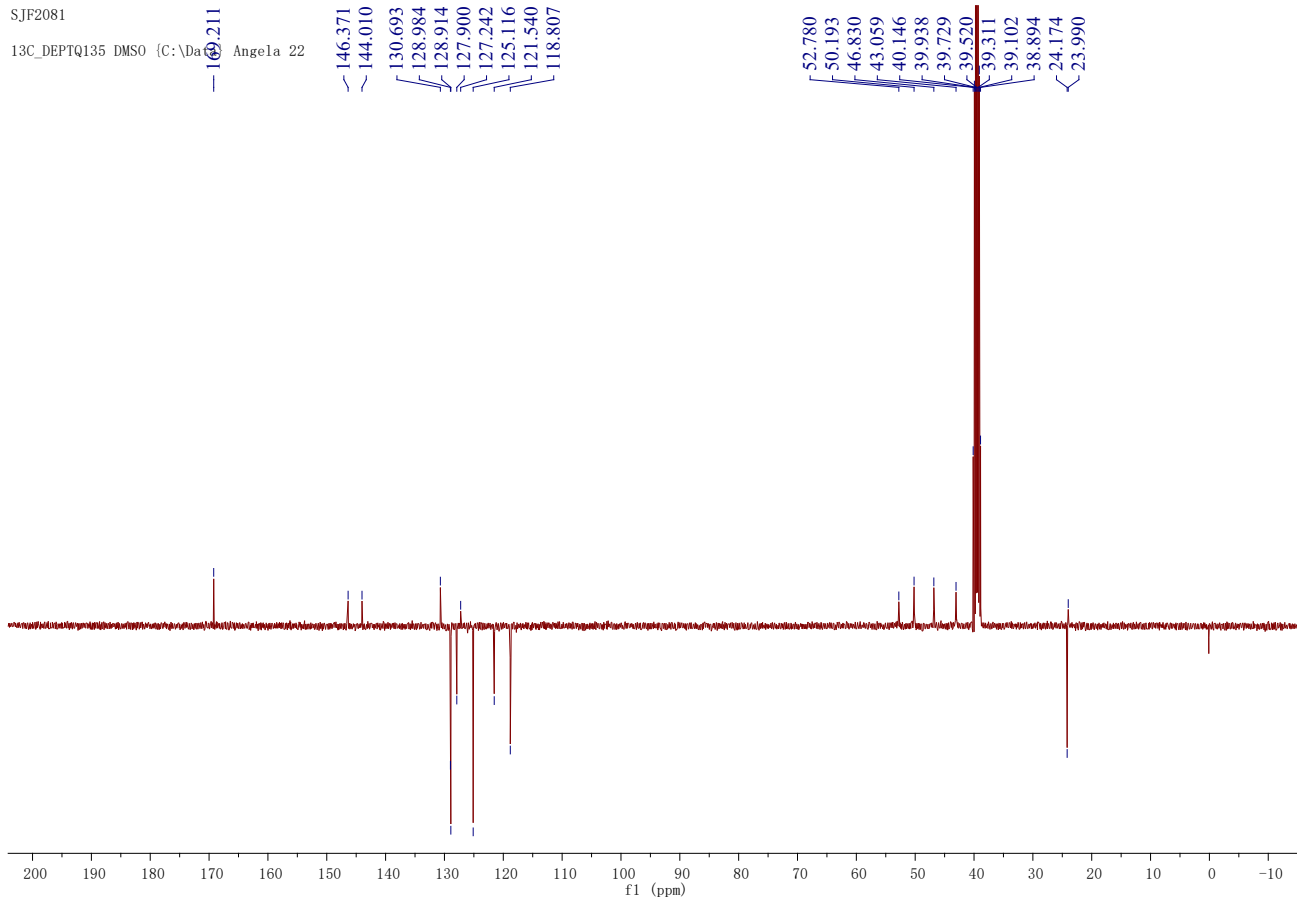

***N*-(4-{4-[3-(4-*p*-Tolyl-[1,2,3]triazol-1-yl)-propyl]-piperazine-1-sulfonyl}-phenyl)-acetamide hydrochloride (26)**

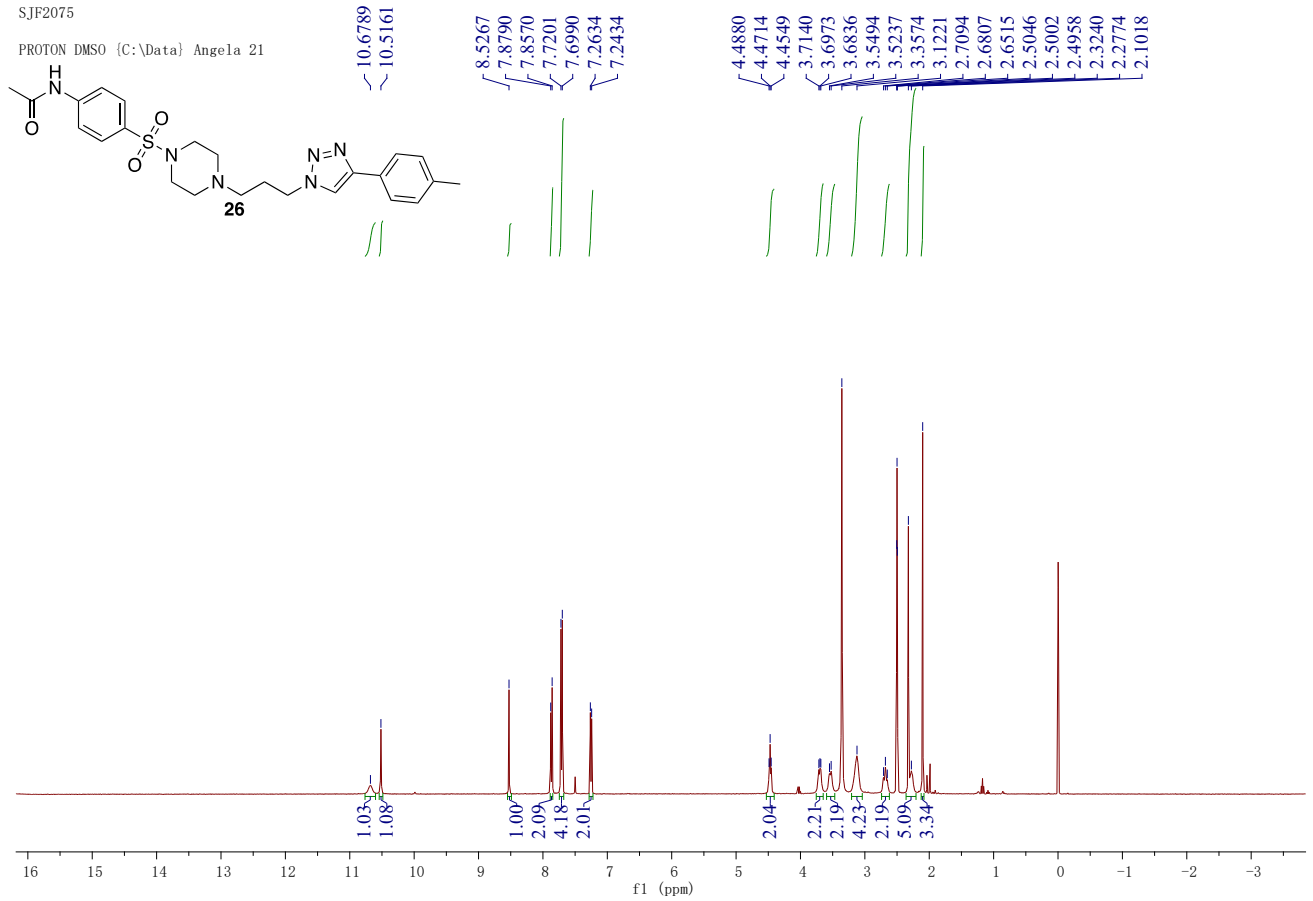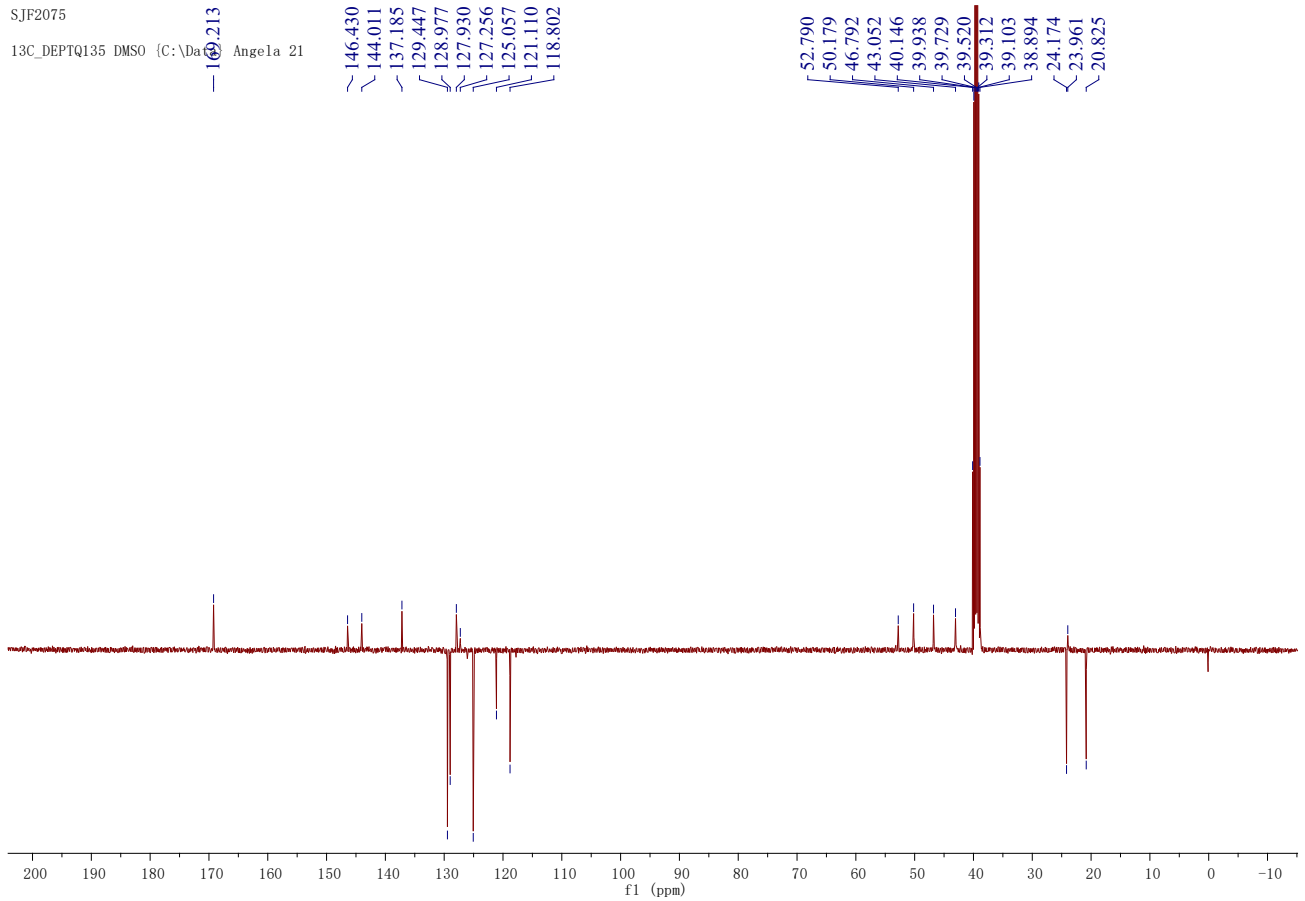

*N*-[4-(4-{3-[4-(4-Ethylphenyl)-[1,2,3]triazol-1-yl]-propyl}-piperazine-1-sulfonyl)-phenyl]-acetamide hydrochloride (**27**)

SJF2047

PROTON DMSO (C:\Data) Angela 28

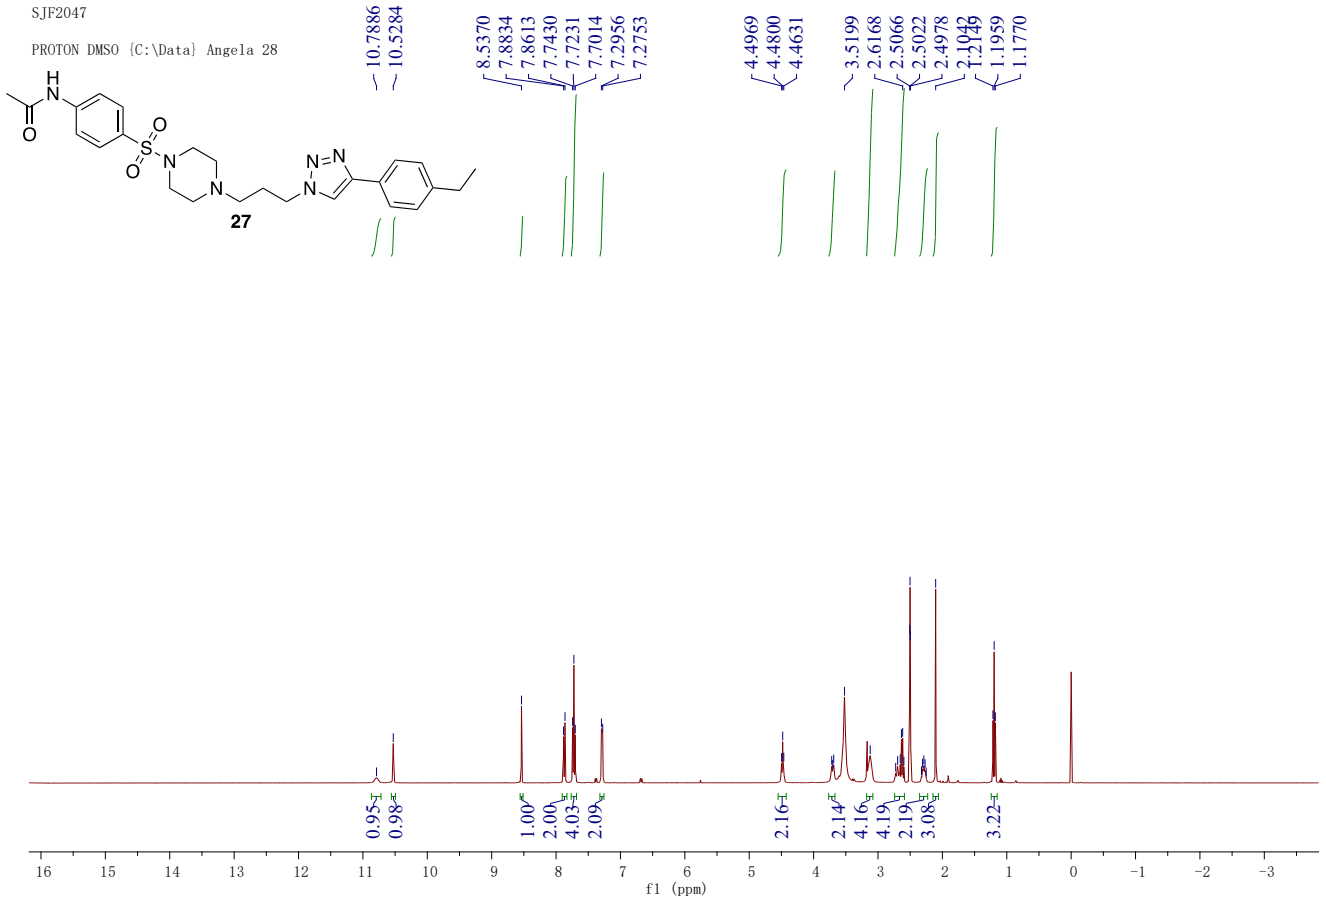

SJF2047

13C\_DEPTQ135 DMSO {C:\Da Angela 28

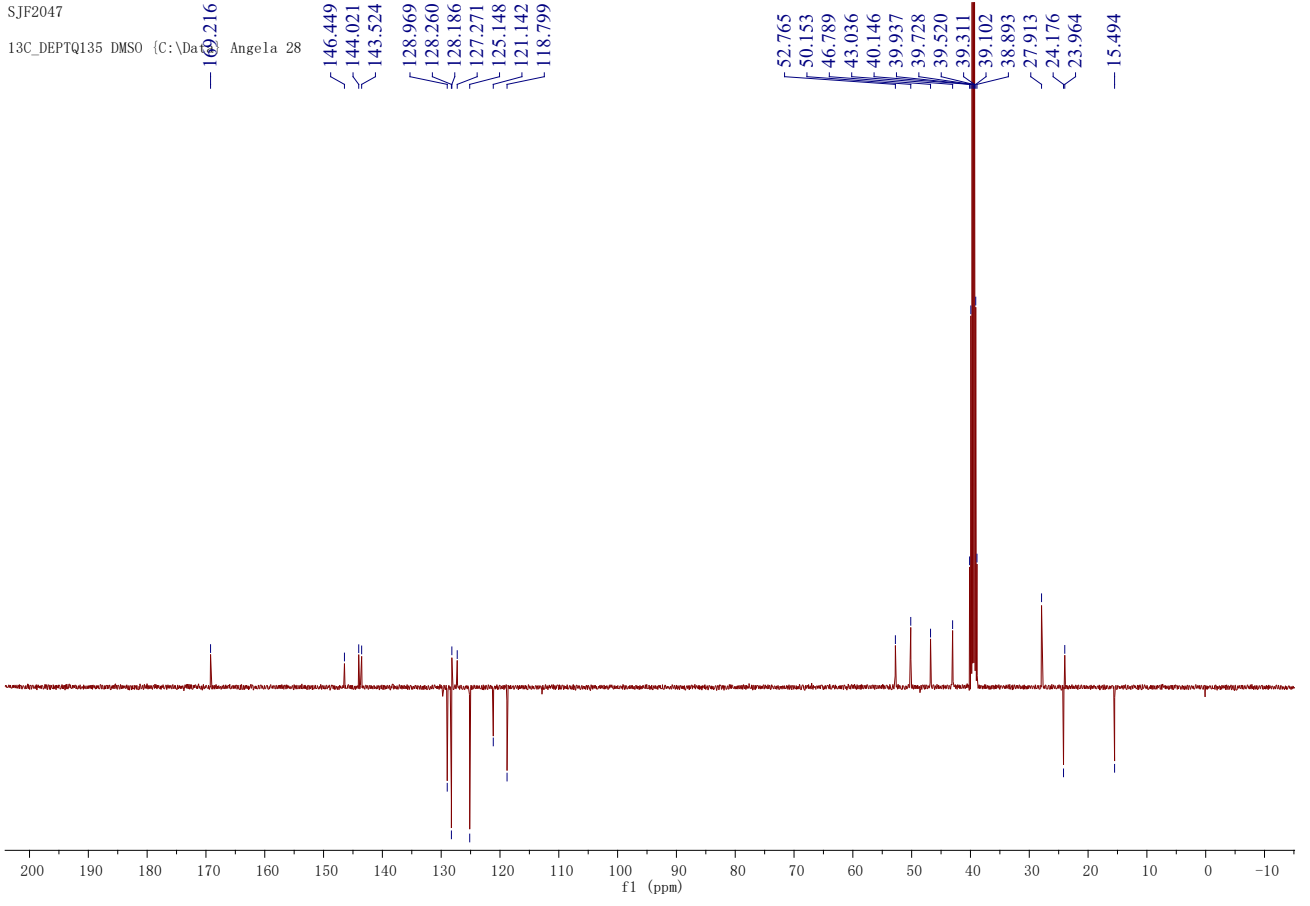

***N*-[4-(4-{3-[4-(4-Fluorophenyl)-[1,2,3]triazol-1-yl]-propyl}-piperazine-1-sulfonyl)-phenyl]-acetamide hydrochloride (28)**

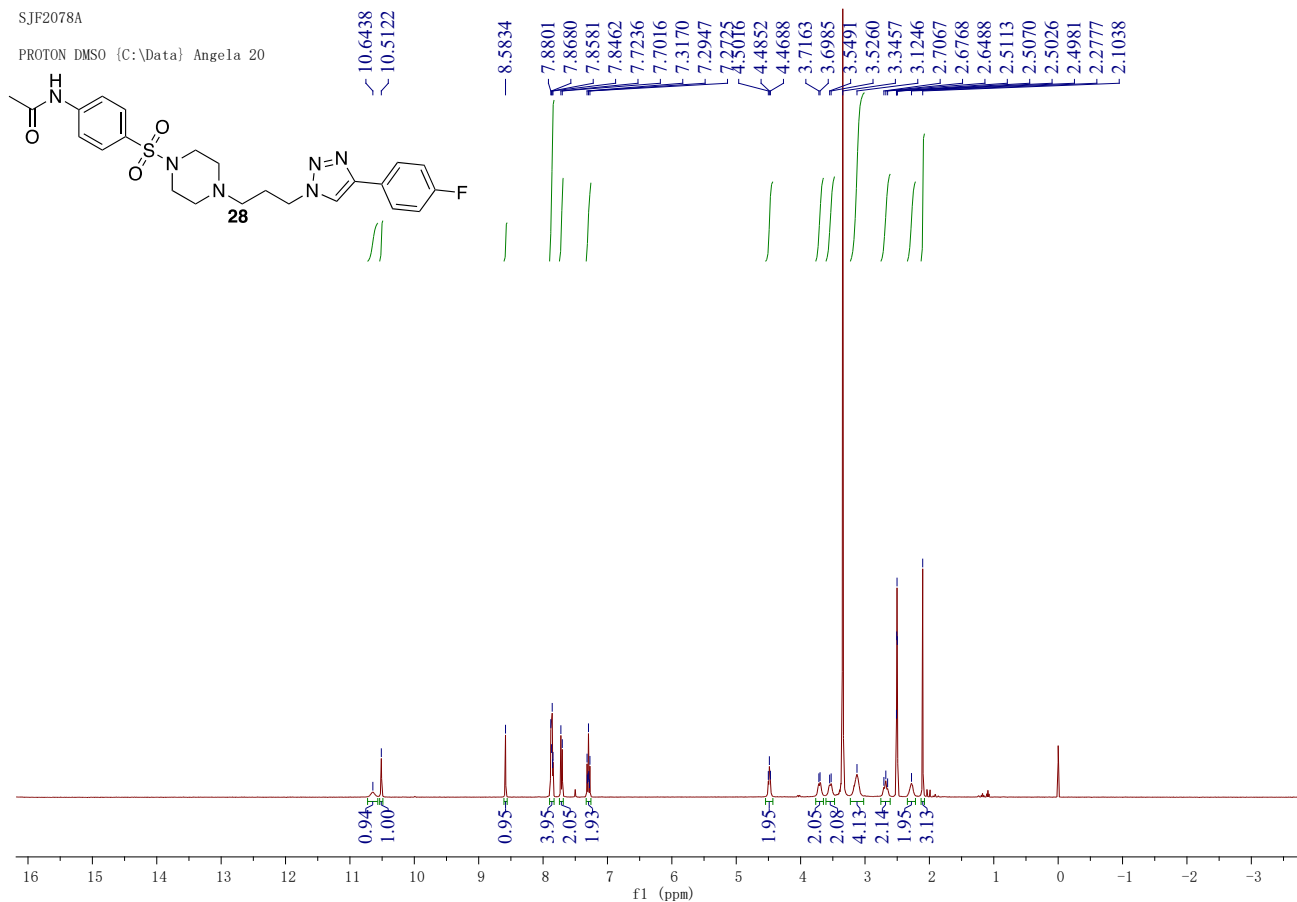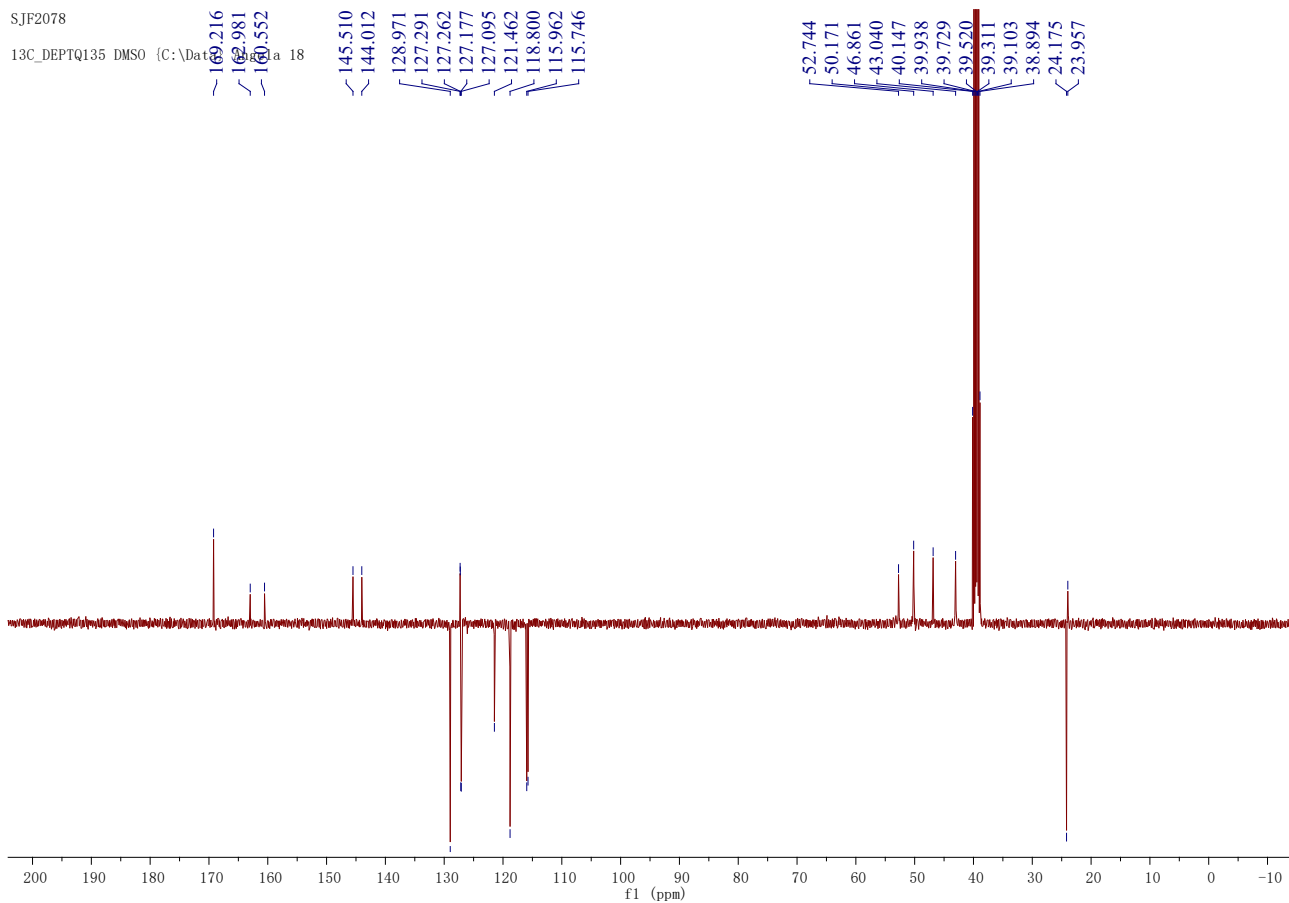

SJF2078

F19CPD DMSO {C:\Data} Cec 14

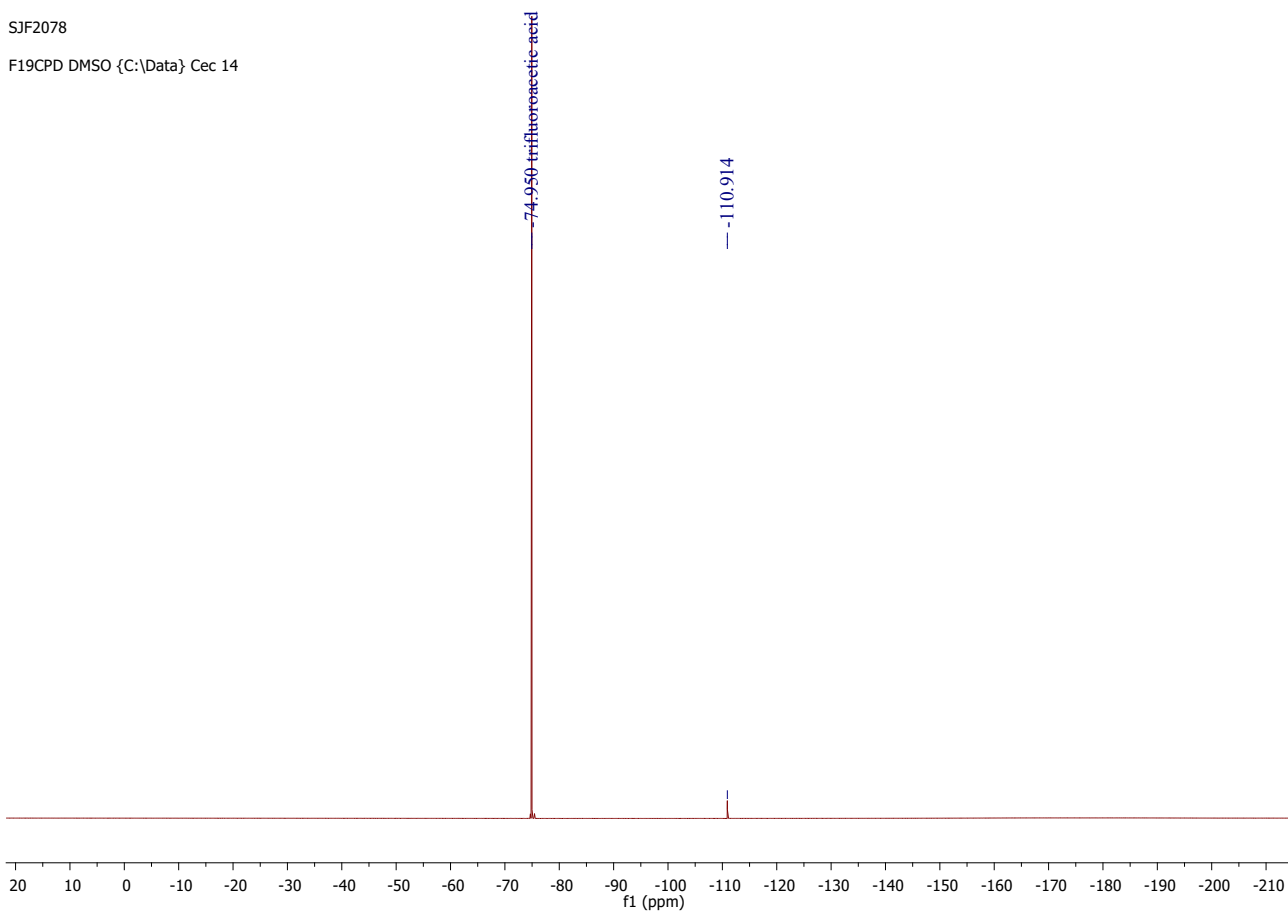



*N*-[4-(4-{3-[4-(4-Bromophenyl)-[1,2,3]triazol-1-yl]-propyl}-piperazine-1-sulfonyl)-phenyl]-acetamide hydrochloride (**29**)

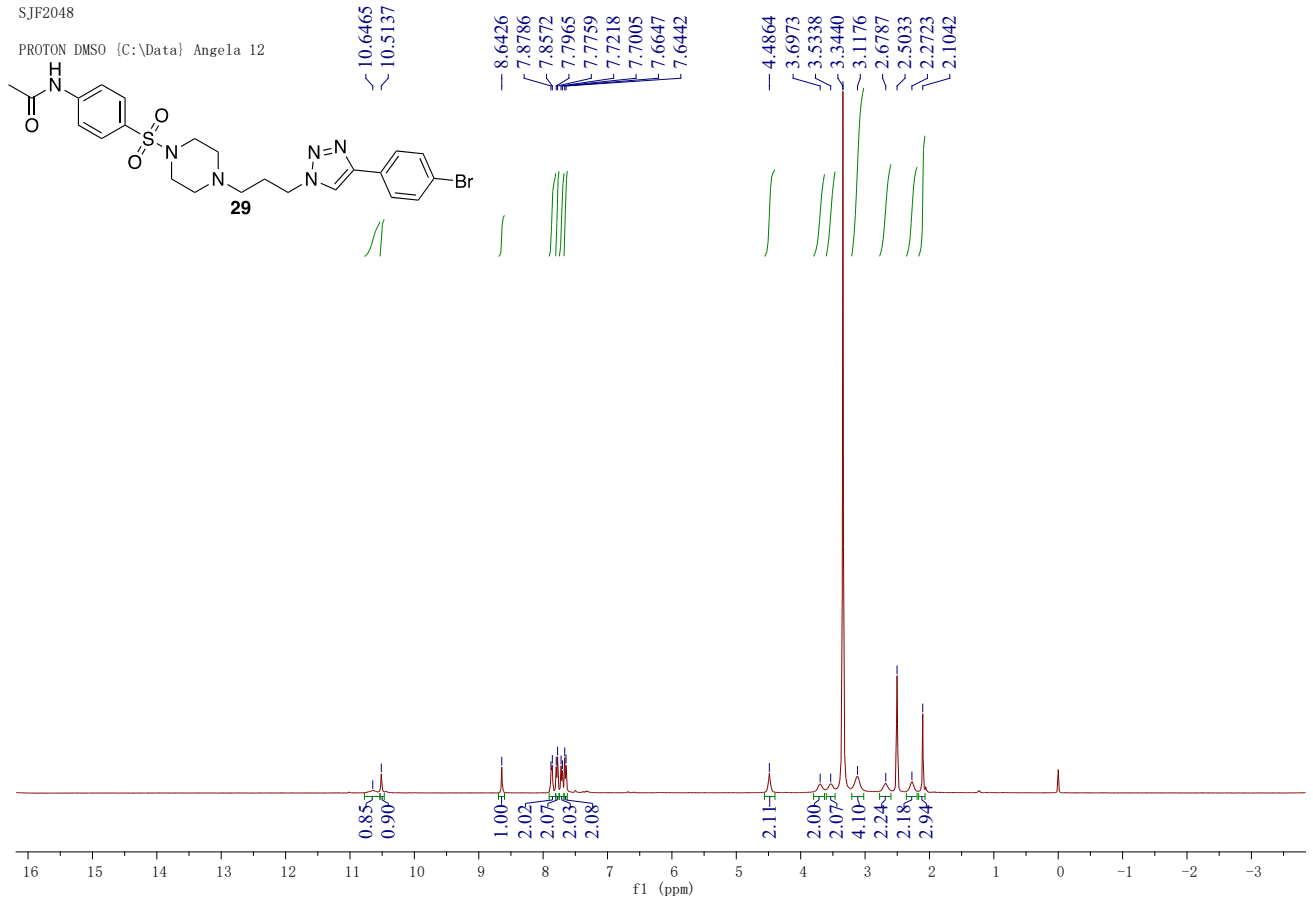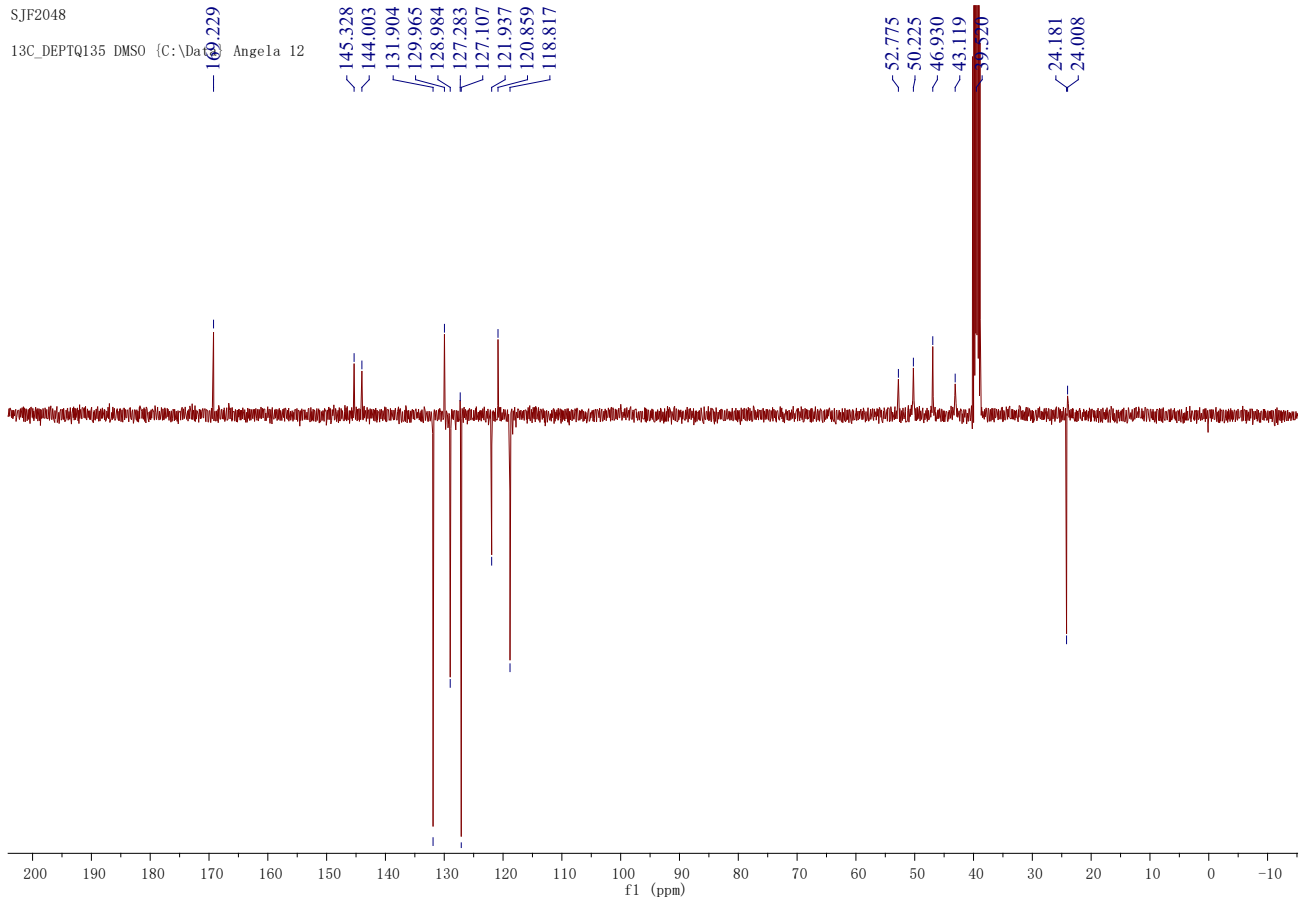

**N-[4-(4-{3-[4-(3-Chloro-phenyl)-[1,2,3]triazol-1-yl]-propyl}-piperazine-1-sulfonyl)-phenyl]-acetamide hydrochloride (30)**

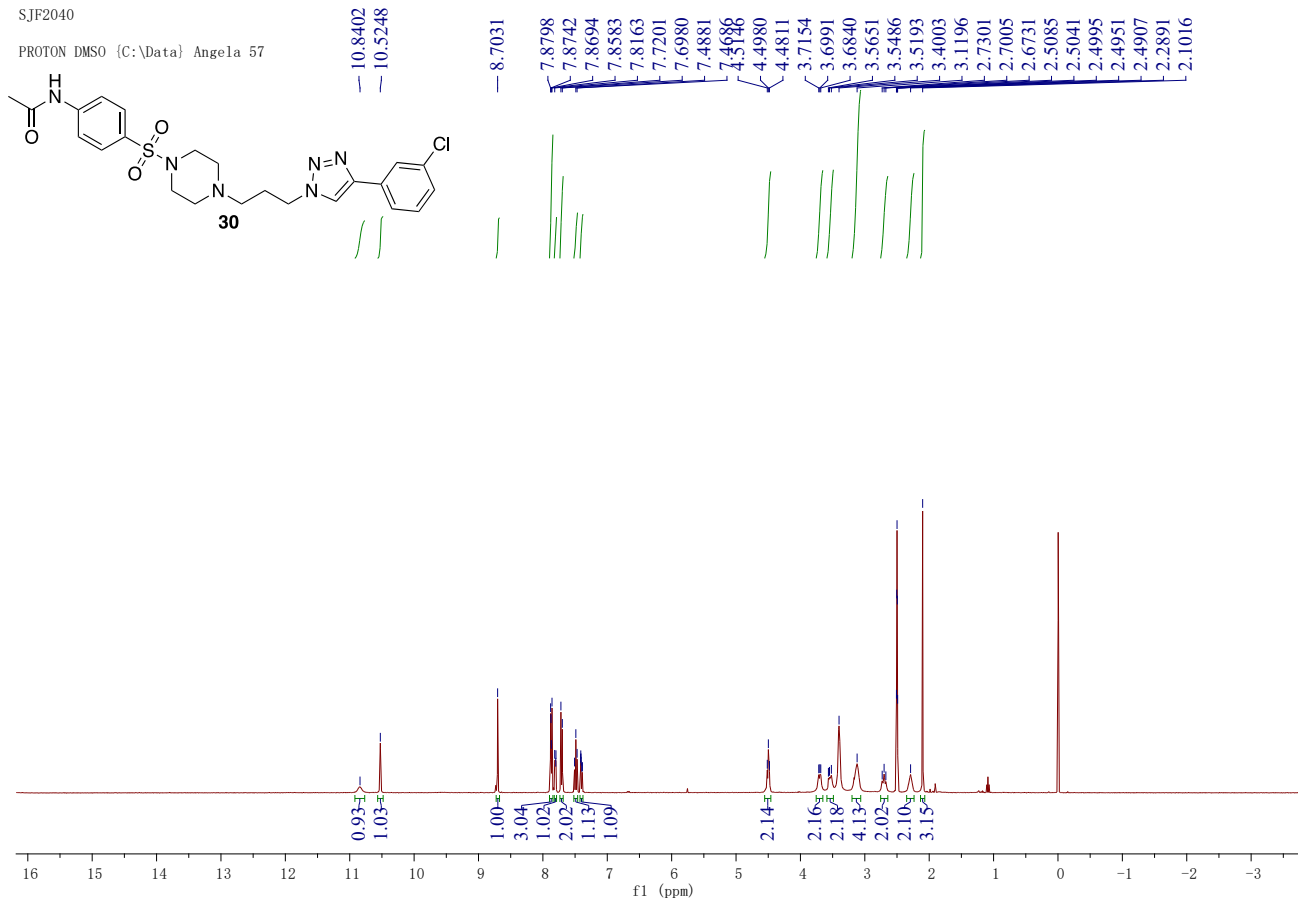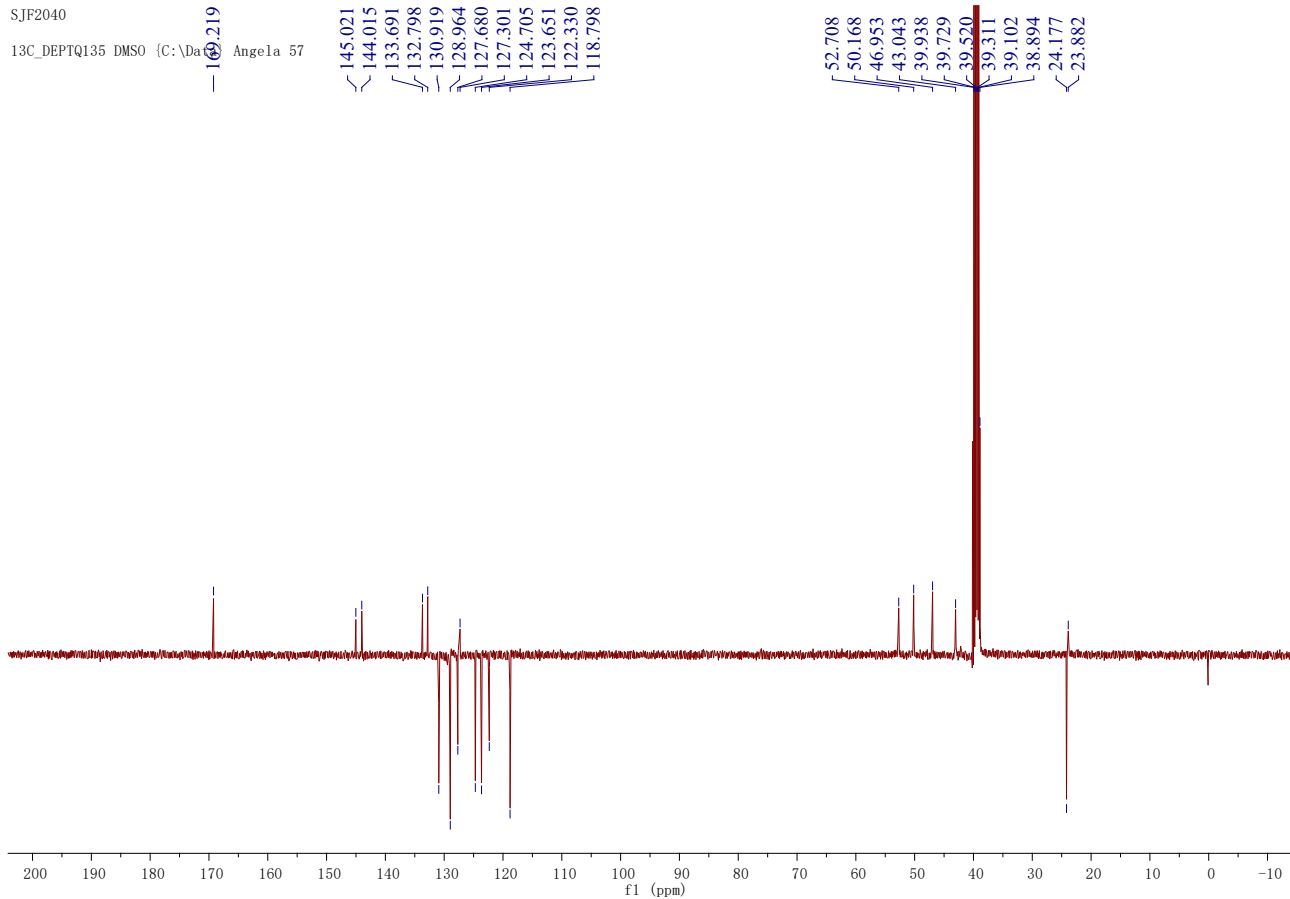

***N*-[4-(4-{3-[4-(4-Trifluoromethylphenyl)-[1,2,3]triazol-1-yl]-propyl}-piperazine-1-sulfonyl)-phenyl]-acetamide hydrochloride (**31**)**

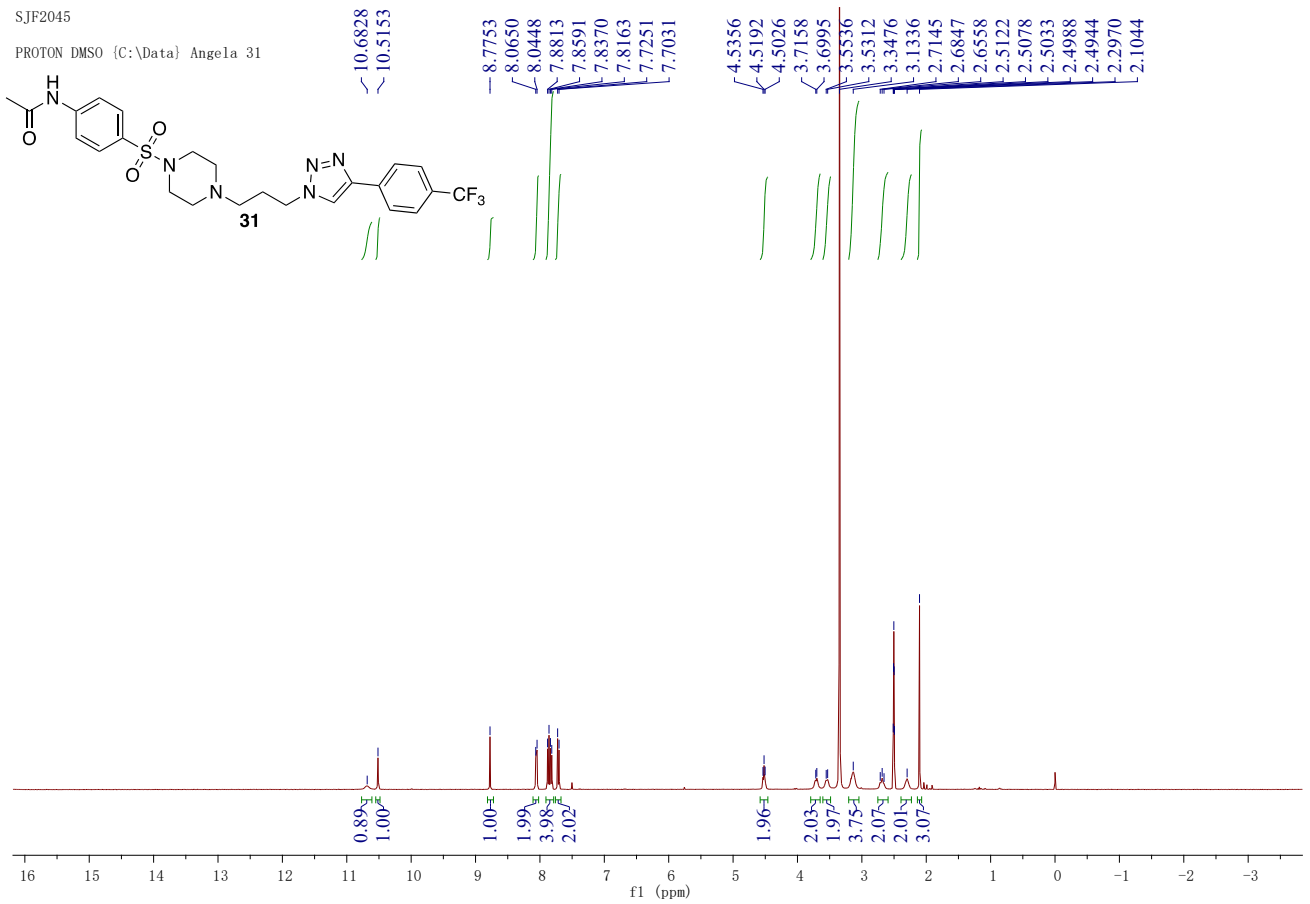

SJF2045A

13C\_DEPTQ135 DMSO {C:\Da Angela 60

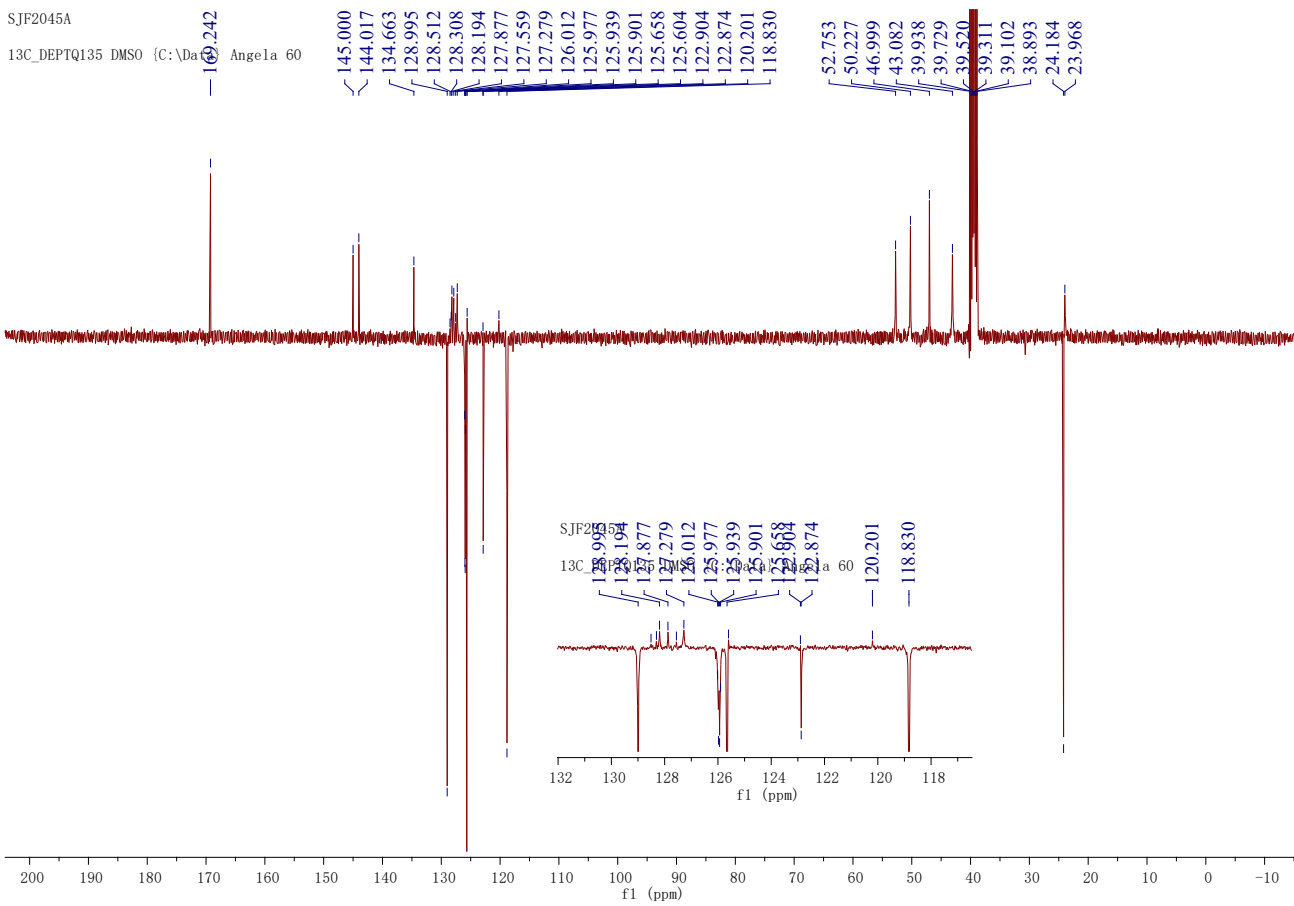

SJF2045

F19CPD DMSO {C:\Data} Cec 27

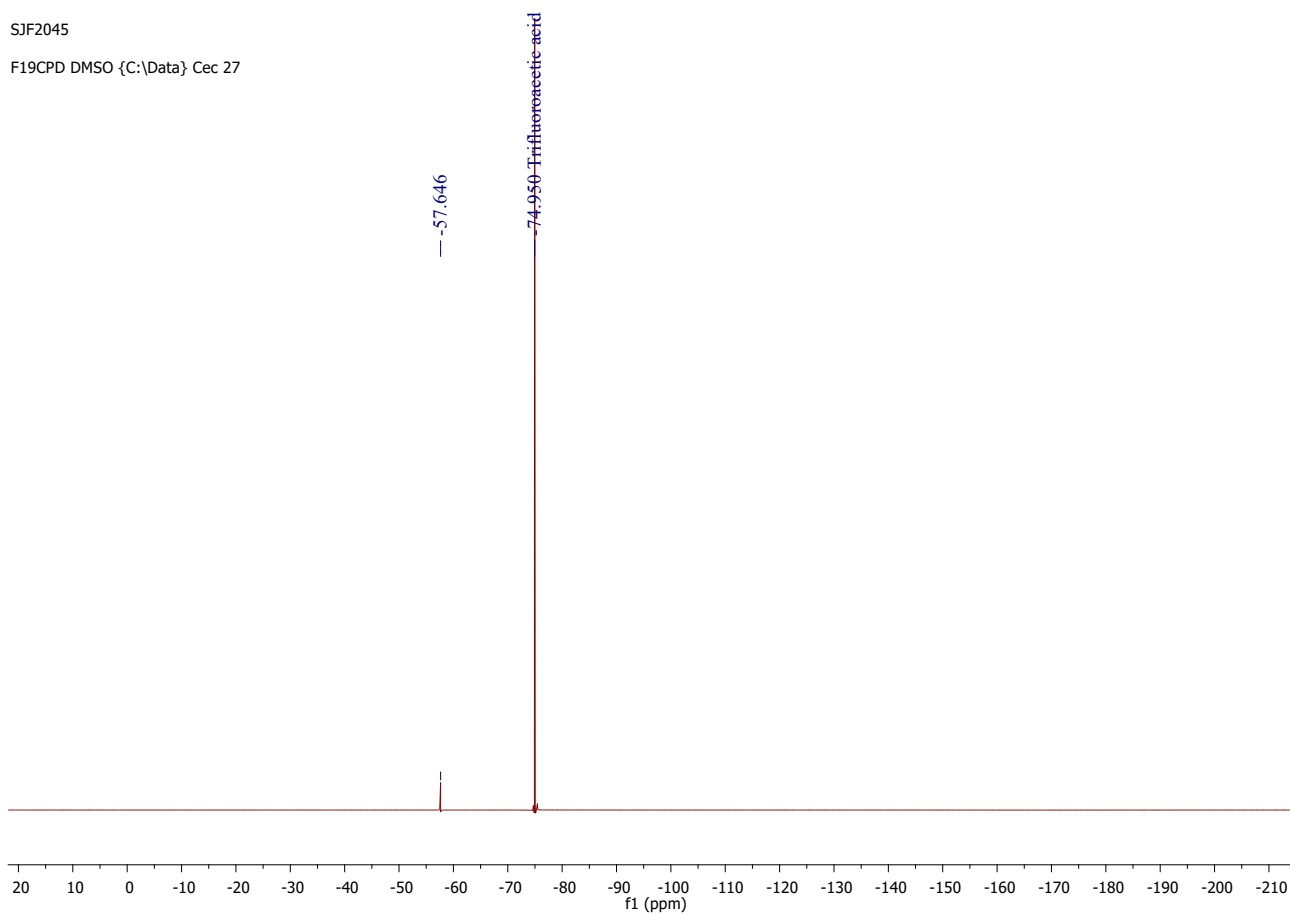

**N-[4-(4-{3-[4-(4-Nitrophenyl)-[1,2,3]triazol-1-yl]-propyl]-piperazine-1-sulfonyl)-phenyl]-acetamide hydrochloride (32)**

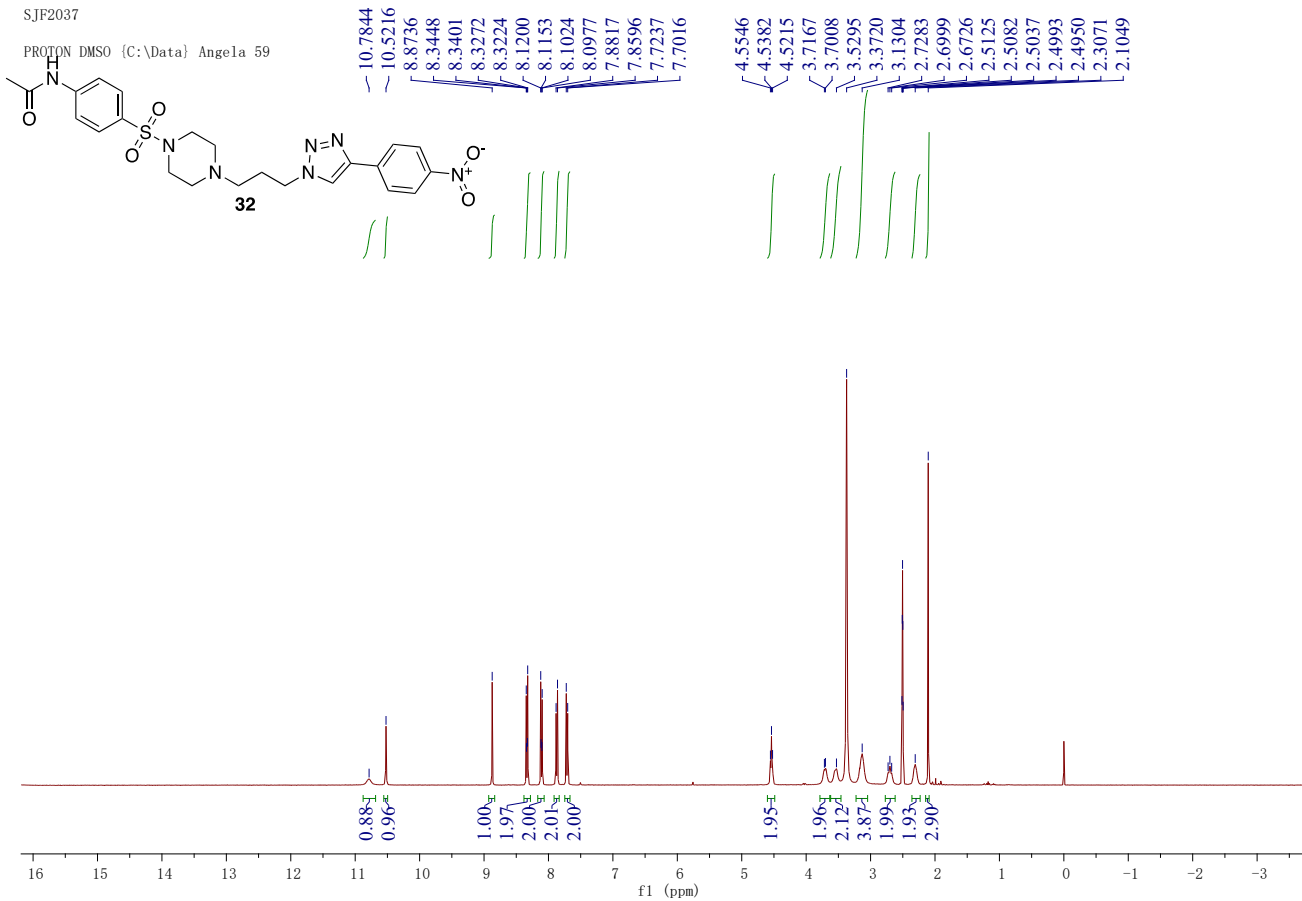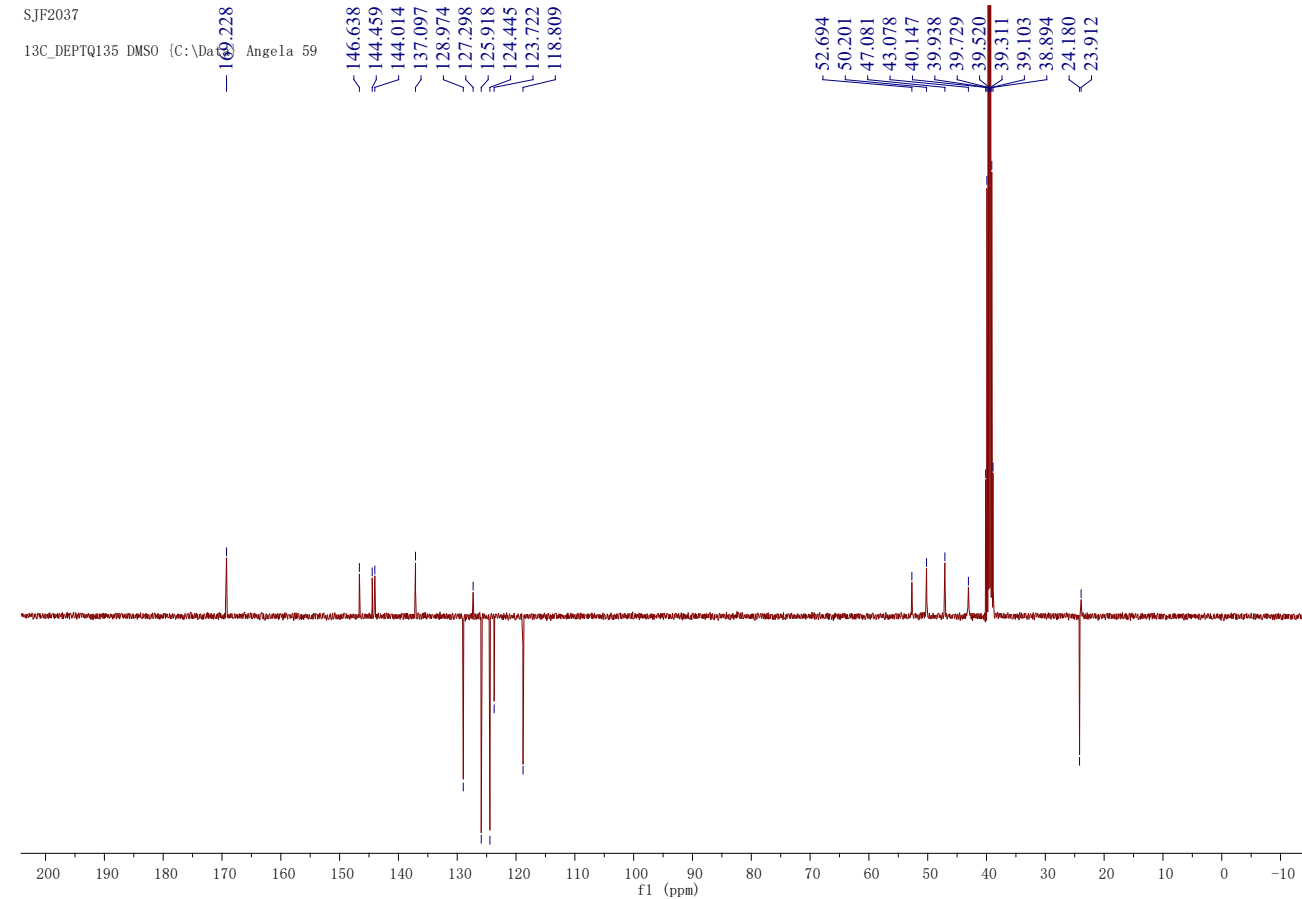

1-(3-(4-Phenyl-1H-1,2,3-triazol-1-yl)propyl)-4-((4-(trifluoromethyl)phenyl)-sulfonyl)piperazine hydrochloride (33)

SJF1179

PROTON DMSO (C:\Data) Angela 47

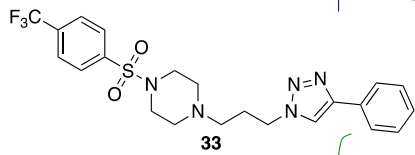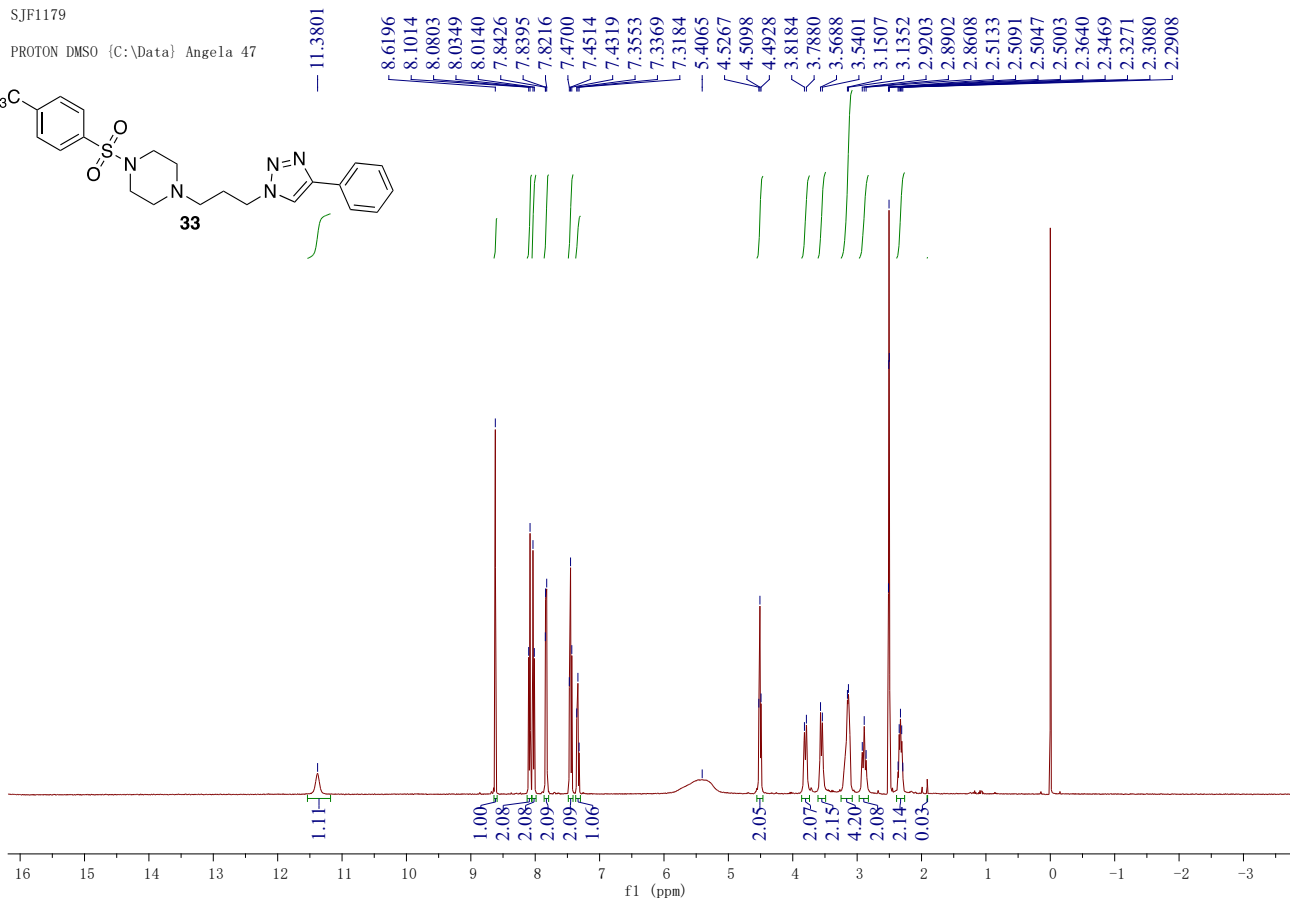

SJF1179

13C\_DEPTQ135 DMSO {C:\Data} Angela 47

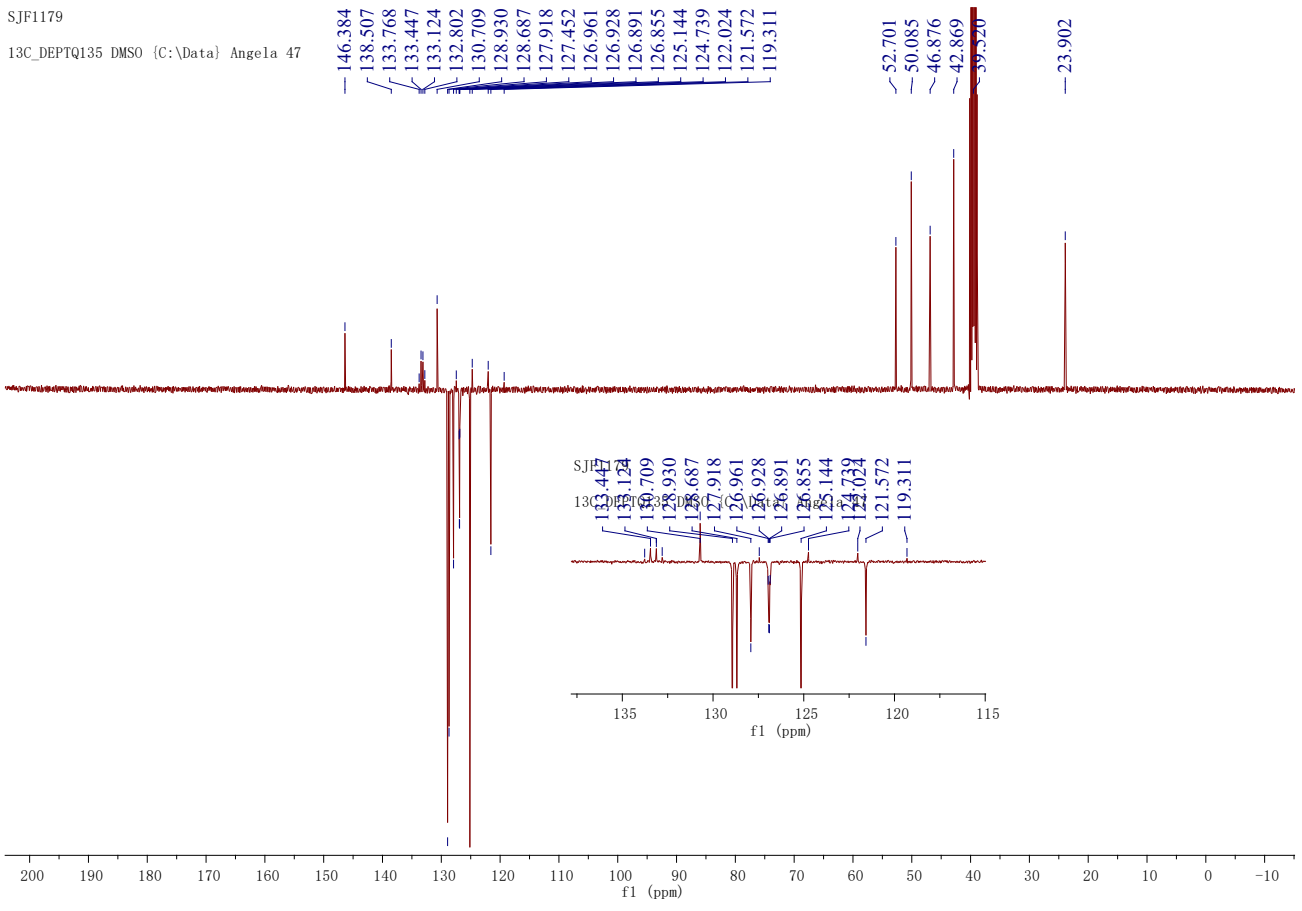



SJF1179

F19CPD DMSO {C:\Data} Cec 19

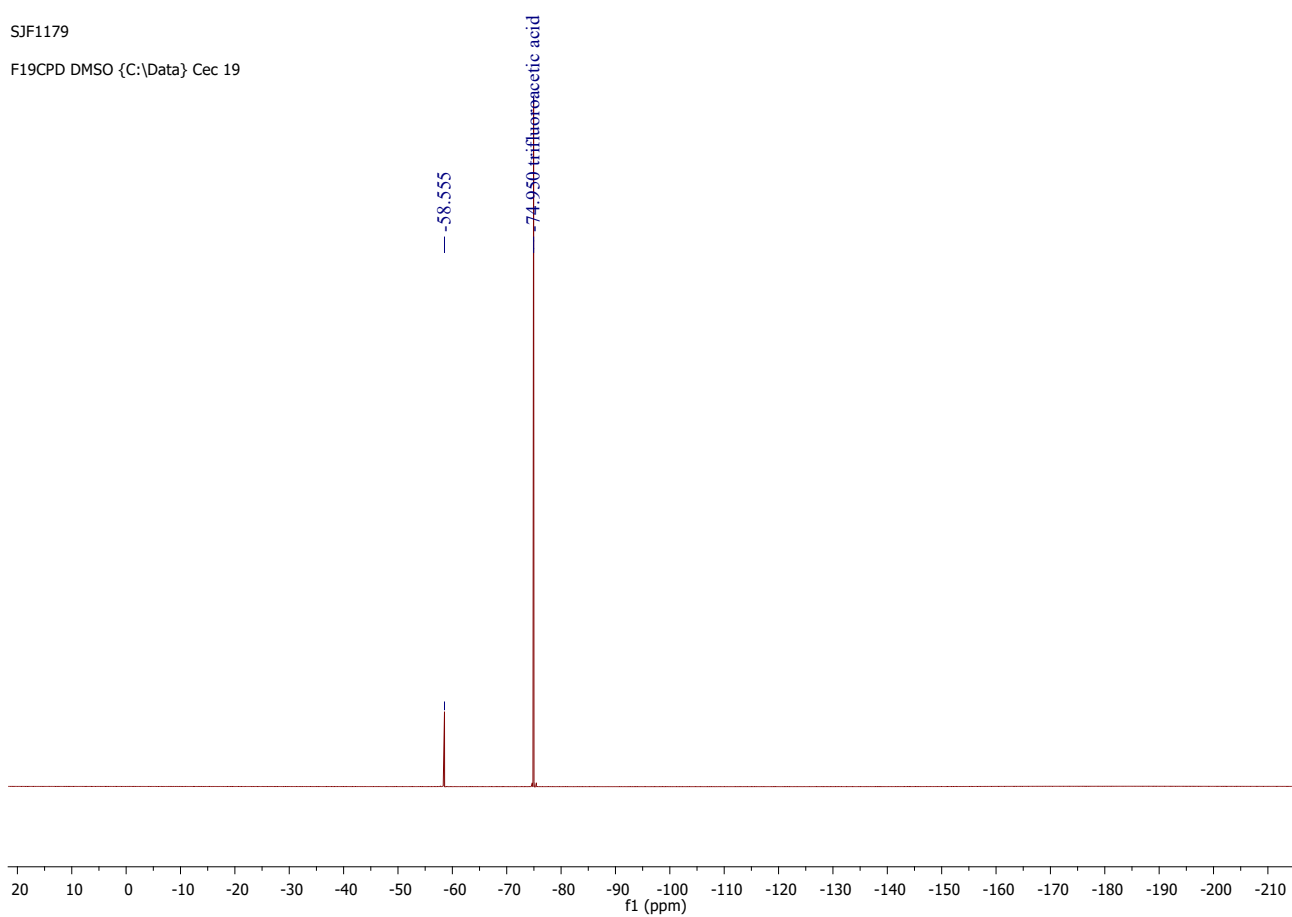

1-(3-(4-(p-Tolyl)-1H-1,2,3-triazol-1-yl)propyl)-4-((4-(trifluoromethyl)phenyl)sulfonyl)piperazine hydrochloride (34)

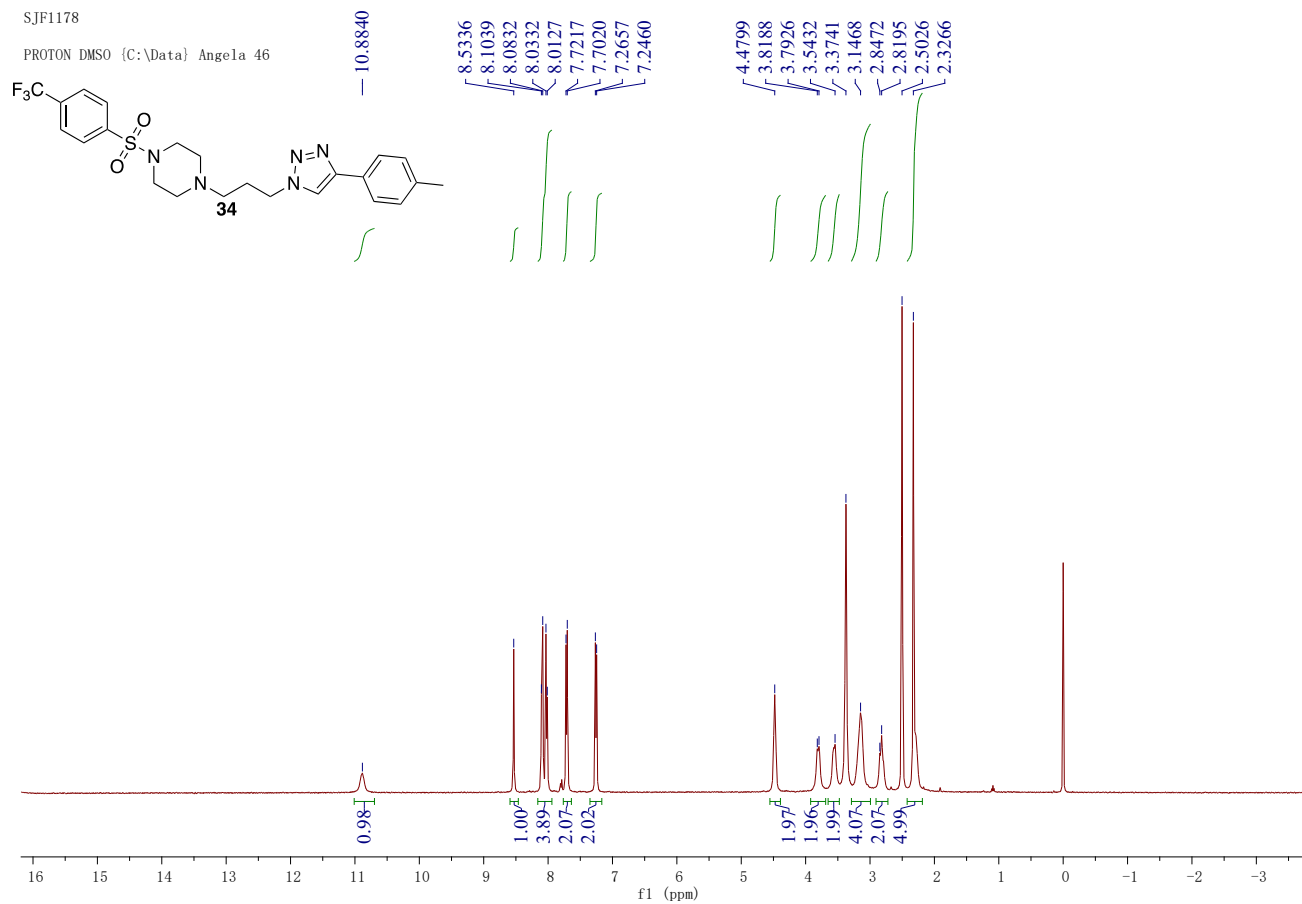

SJF1178

13C\_DEPTQ135 CDC13 (C:\Data) Cec 7

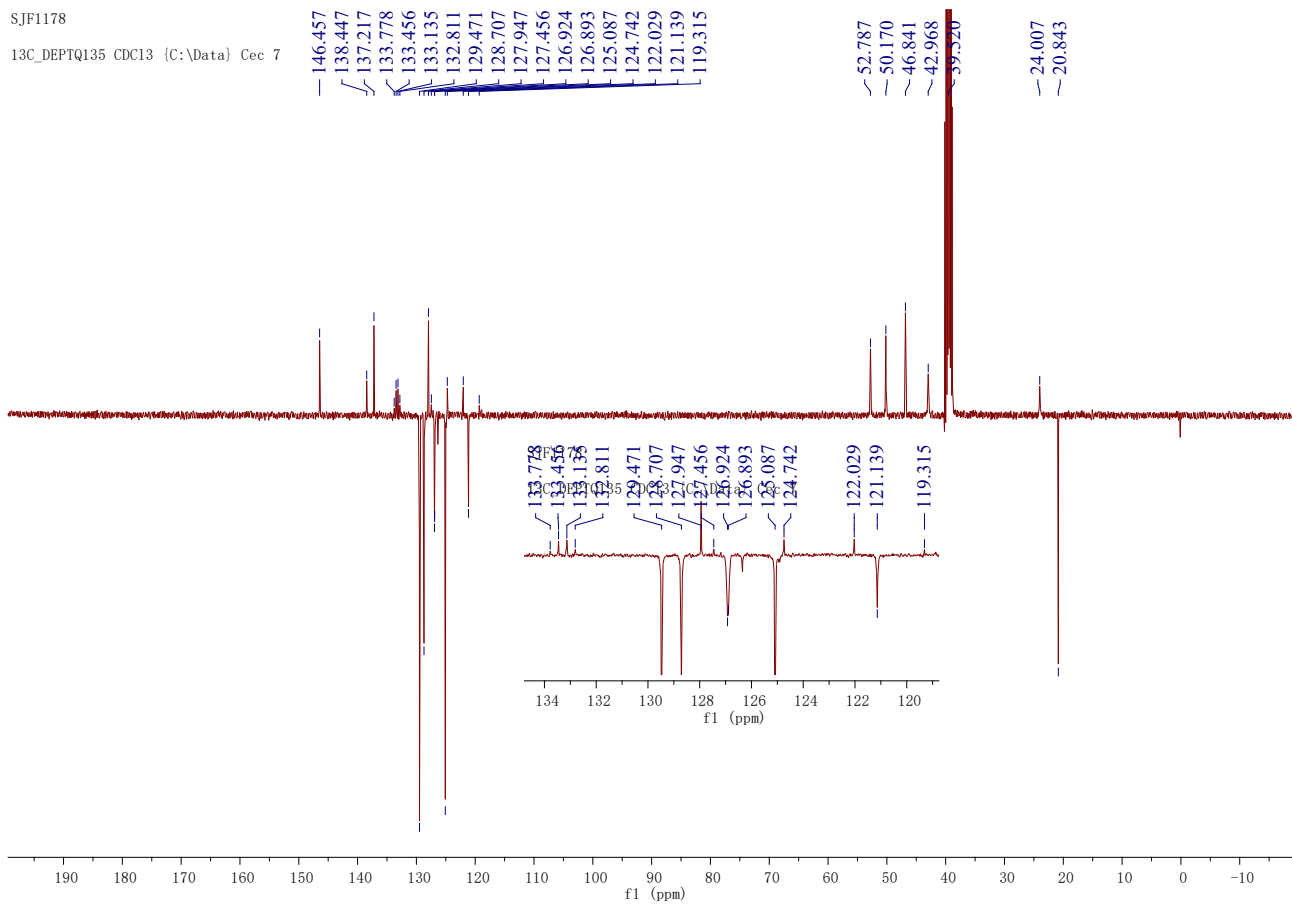

SJF1178

F19CPD DMSO {C:\Data} Cec 20

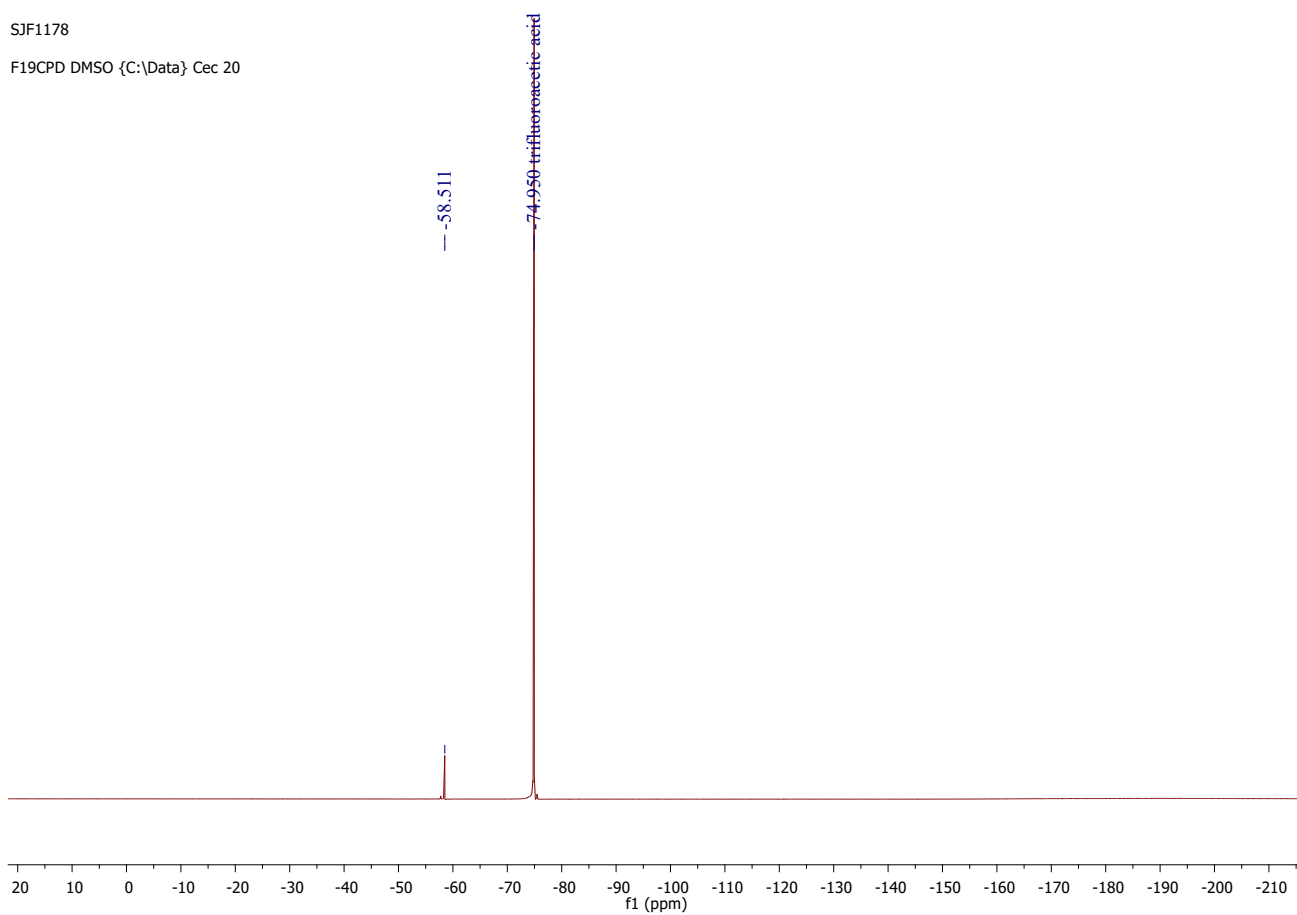

1-(3-(4-(4-Ethylphenyl)-1H-1,2,3-triazol-1-yl)propyl)-4-(4-(trifluoromethyl)phenyl)-sulfonylpiperazine hydrochloride  
(35)

SJF1172

PROTON DMSO (C:\Data) Angela 50

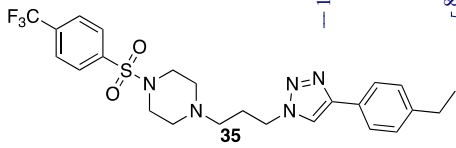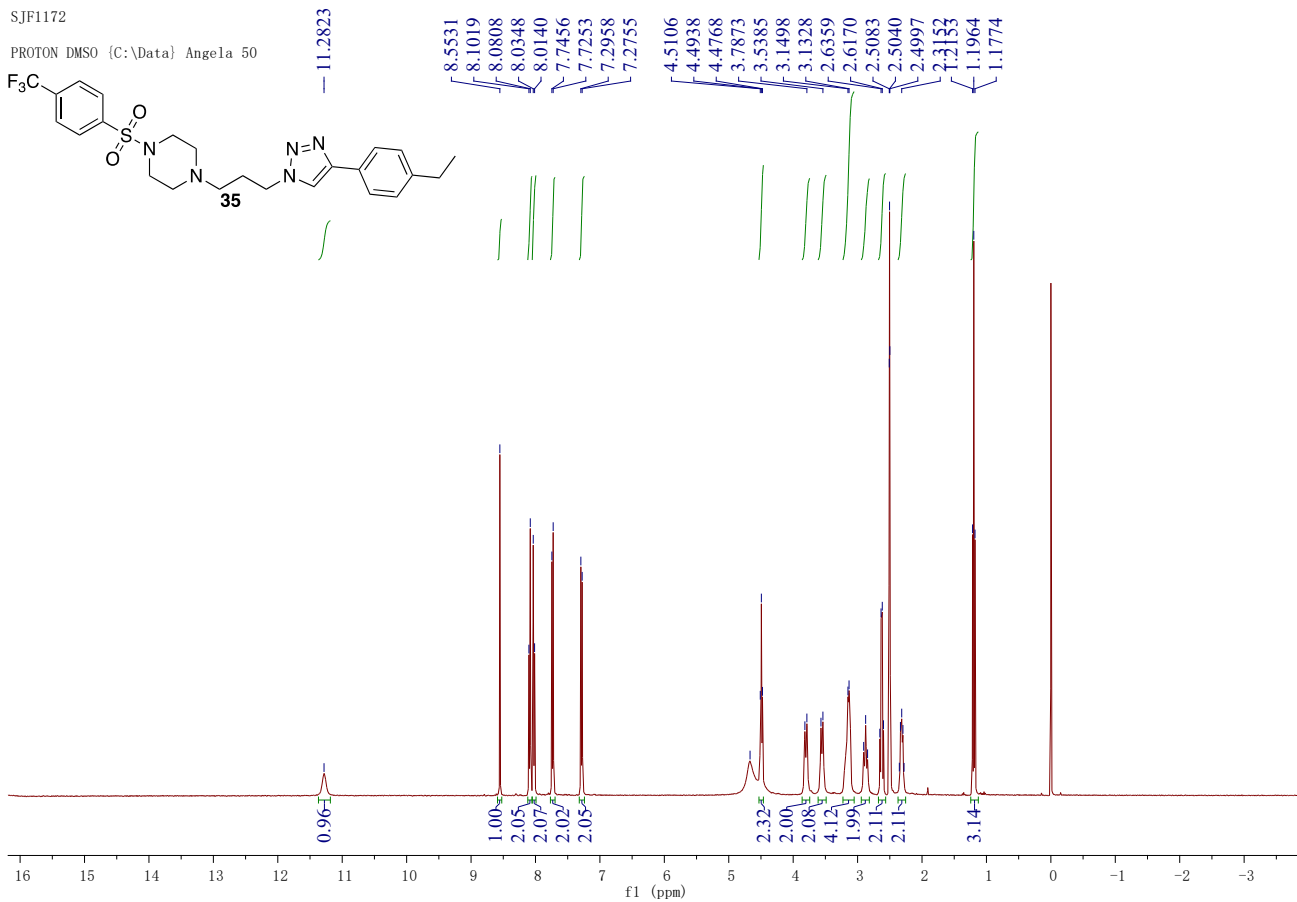

SJF1172  
SJF1172  
13C\_DEPTQ135 DMSO {C:\Dat

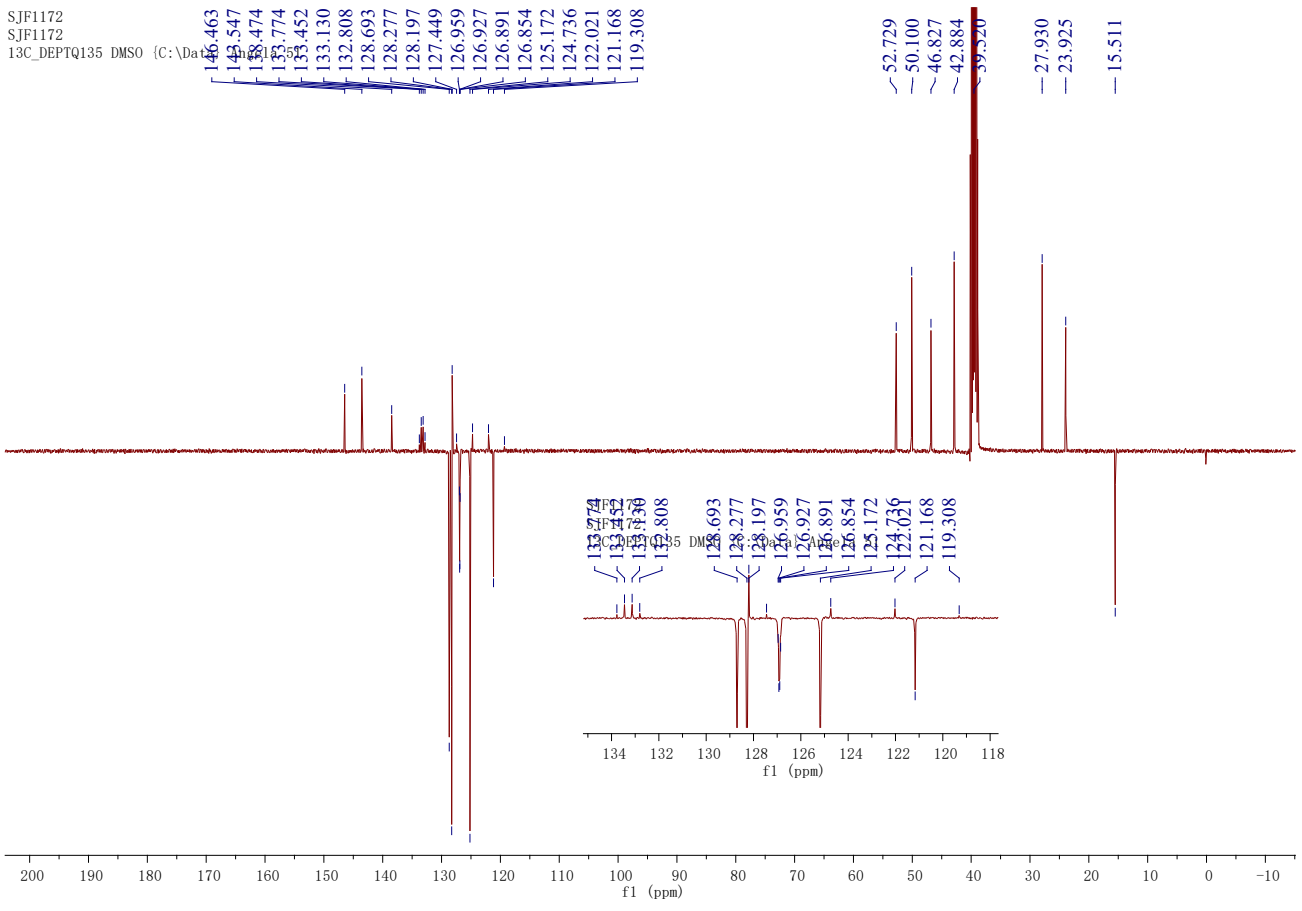

SJF1172

F19CPD DMSO {C:\Data} Cec 29

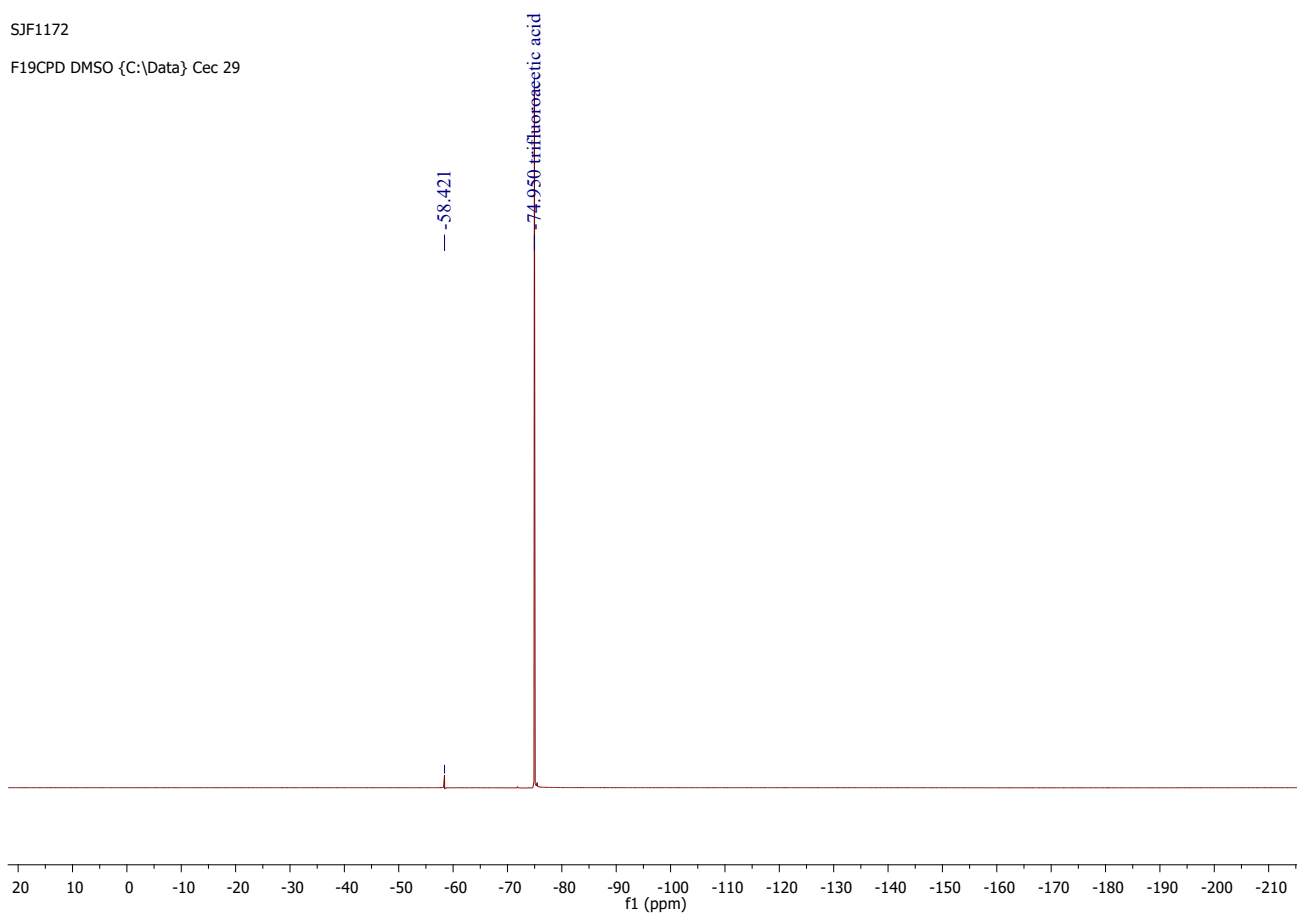

1-(3-(4-(4-(Tert-butyl)phenyl)-1H-1,2,3-triazol-1-yl)propyl)-4-((4-(trifluoromethyl)phenyl)sulfonyl) piperazine hydrochloride (36)

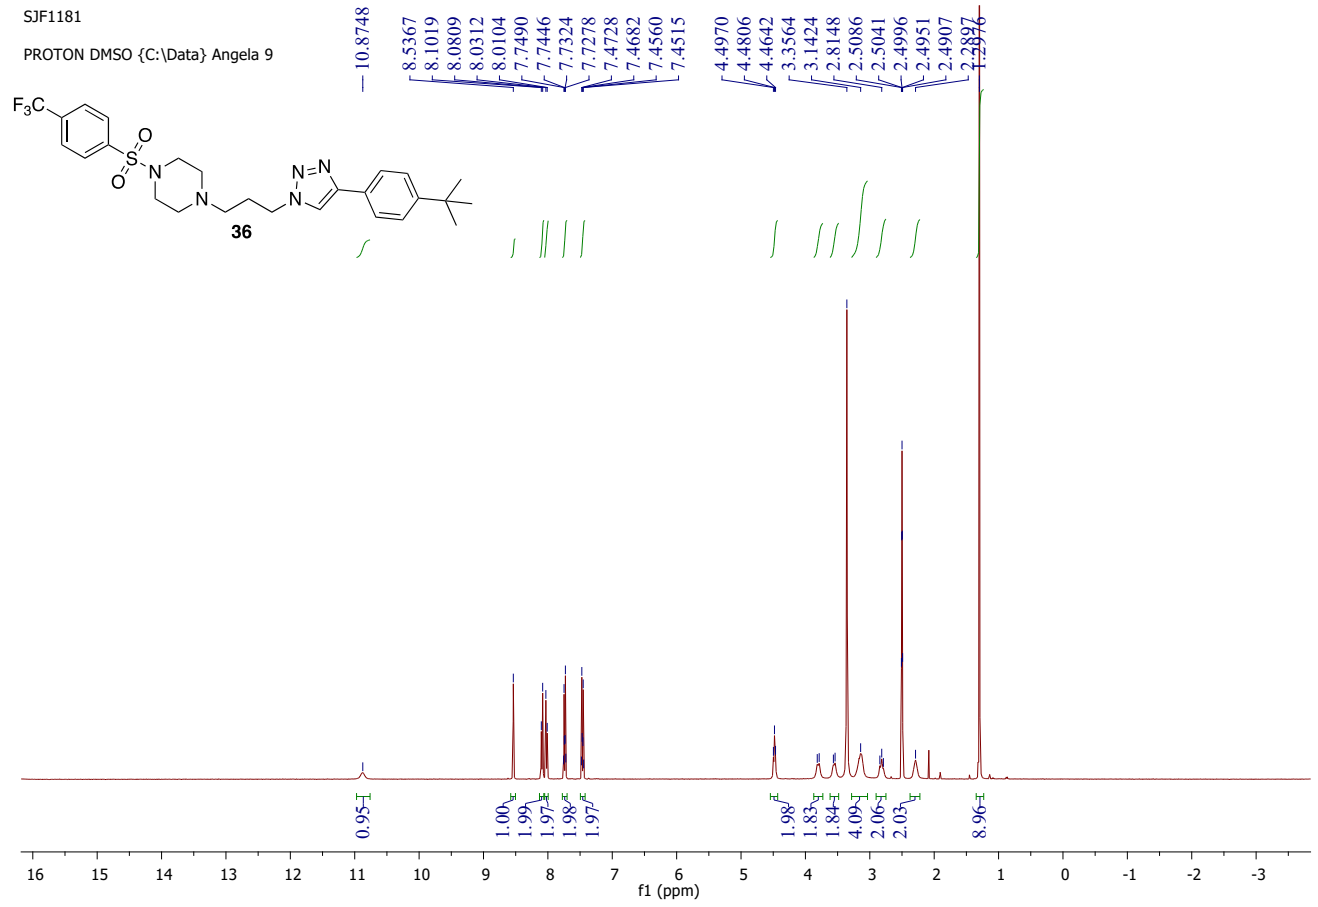



SJF1181

13C\_3hours DMSO (C:\Data) Angela 48

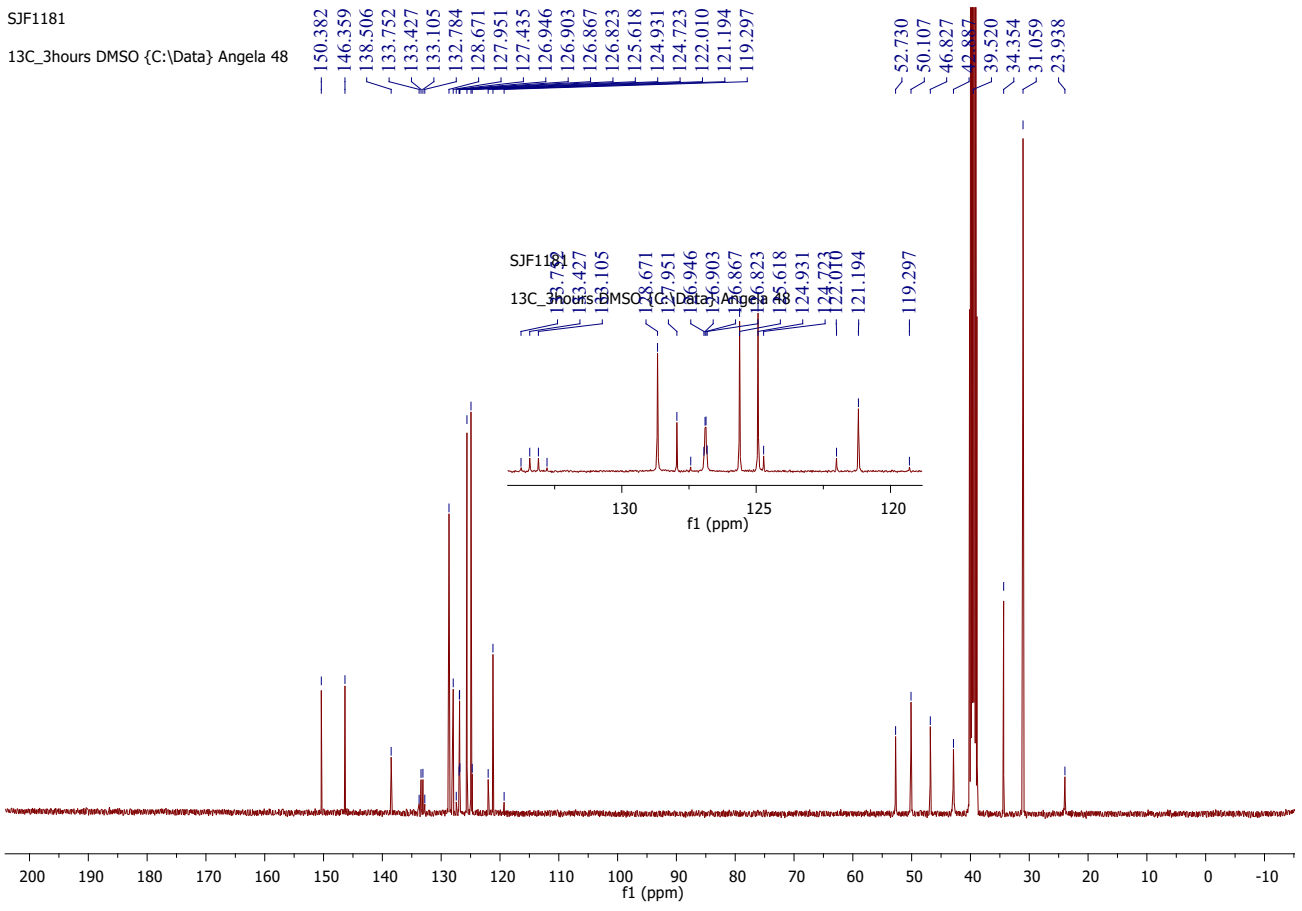

SJF1181A

F19CPD DMSO {C:\Data} Angela 49

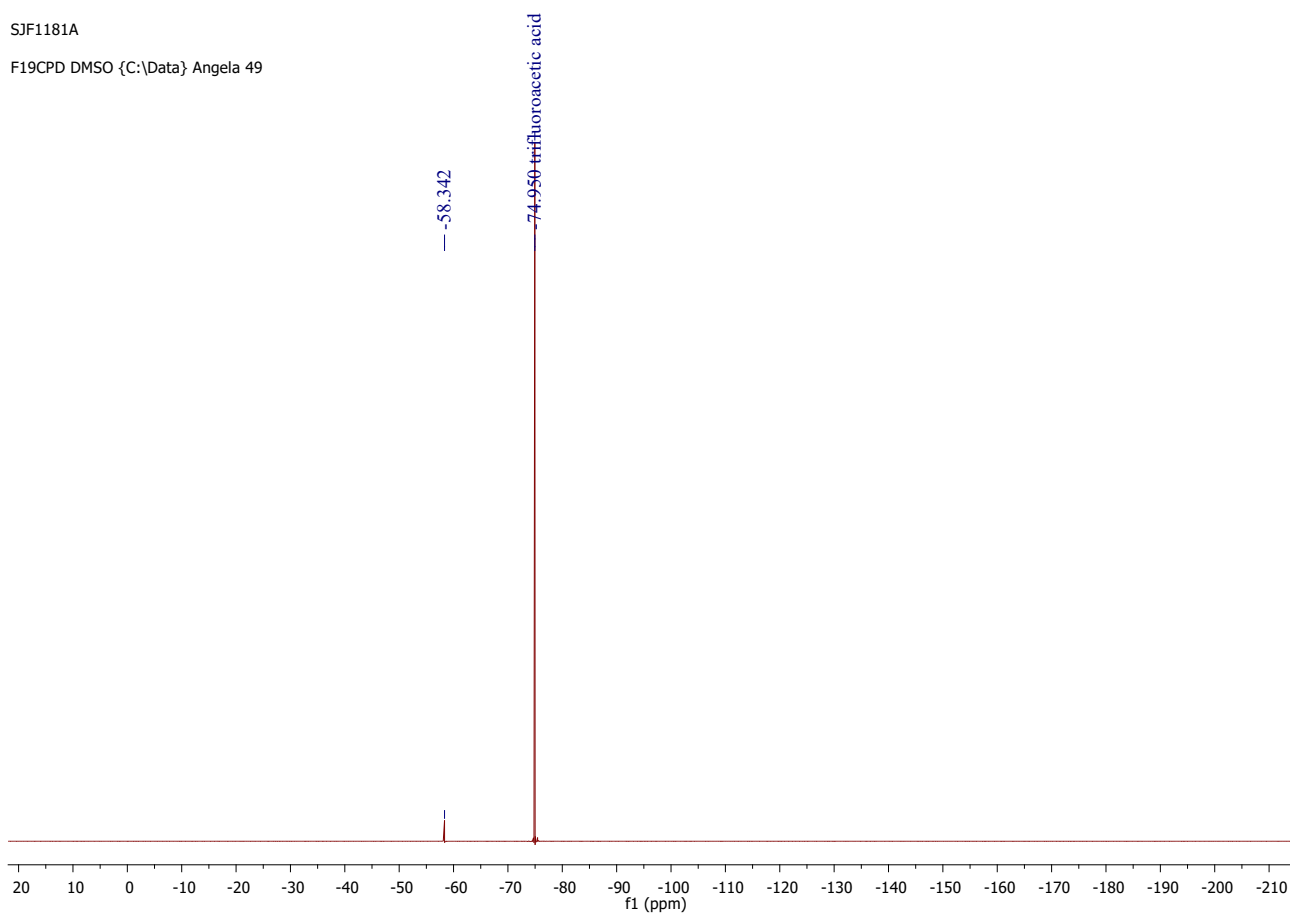

1-(3-(4-(4-Fluorophenyl)-1H-1,2,3-triazol-1-yl)propyl)-4-((4-(trifluoromethyl)-phenyl)sulfonyl)piperazine hydrochloride  
(37)

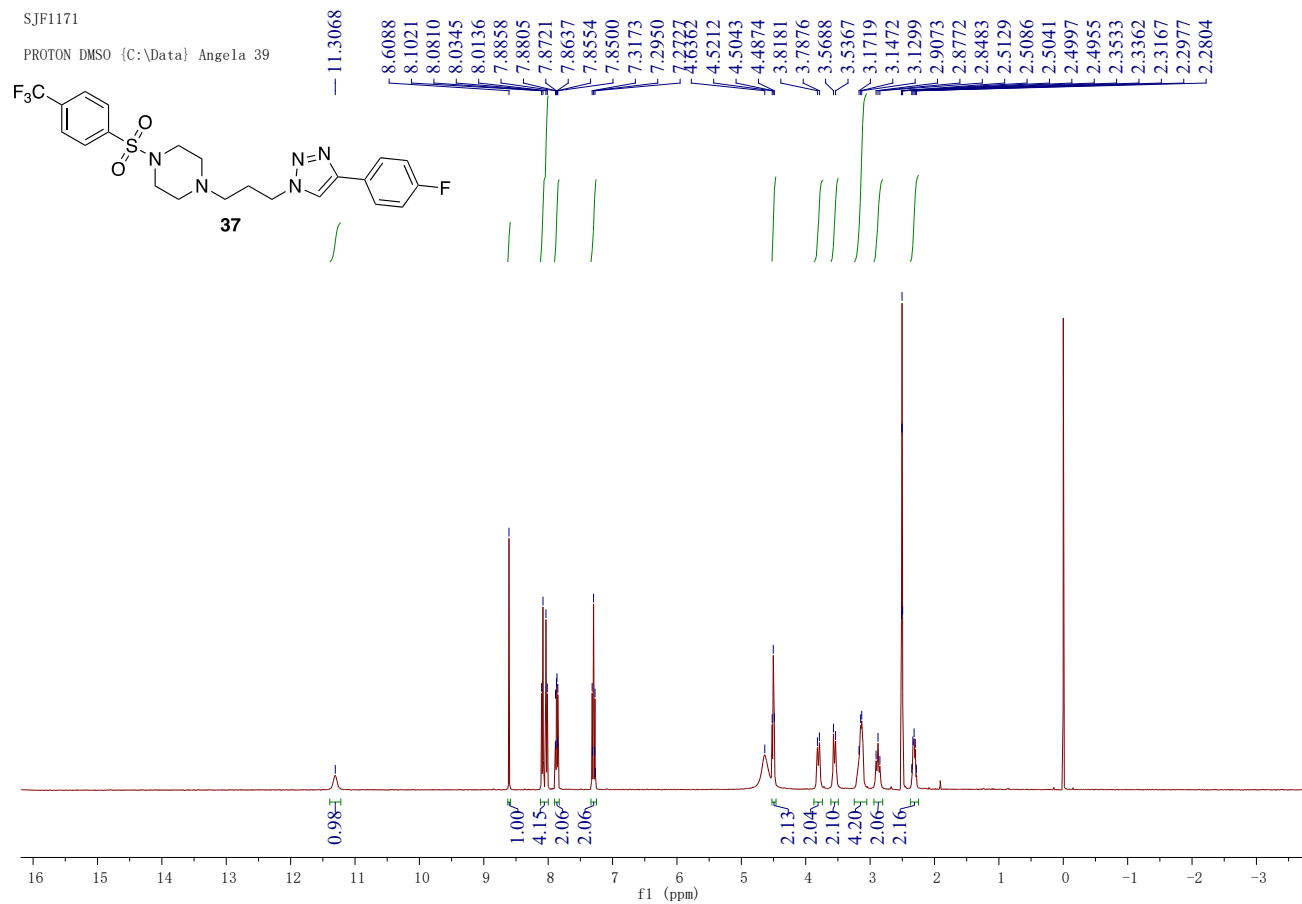

SJF1171  
13C\_DEPTQ135 DMSO {C:\Data}

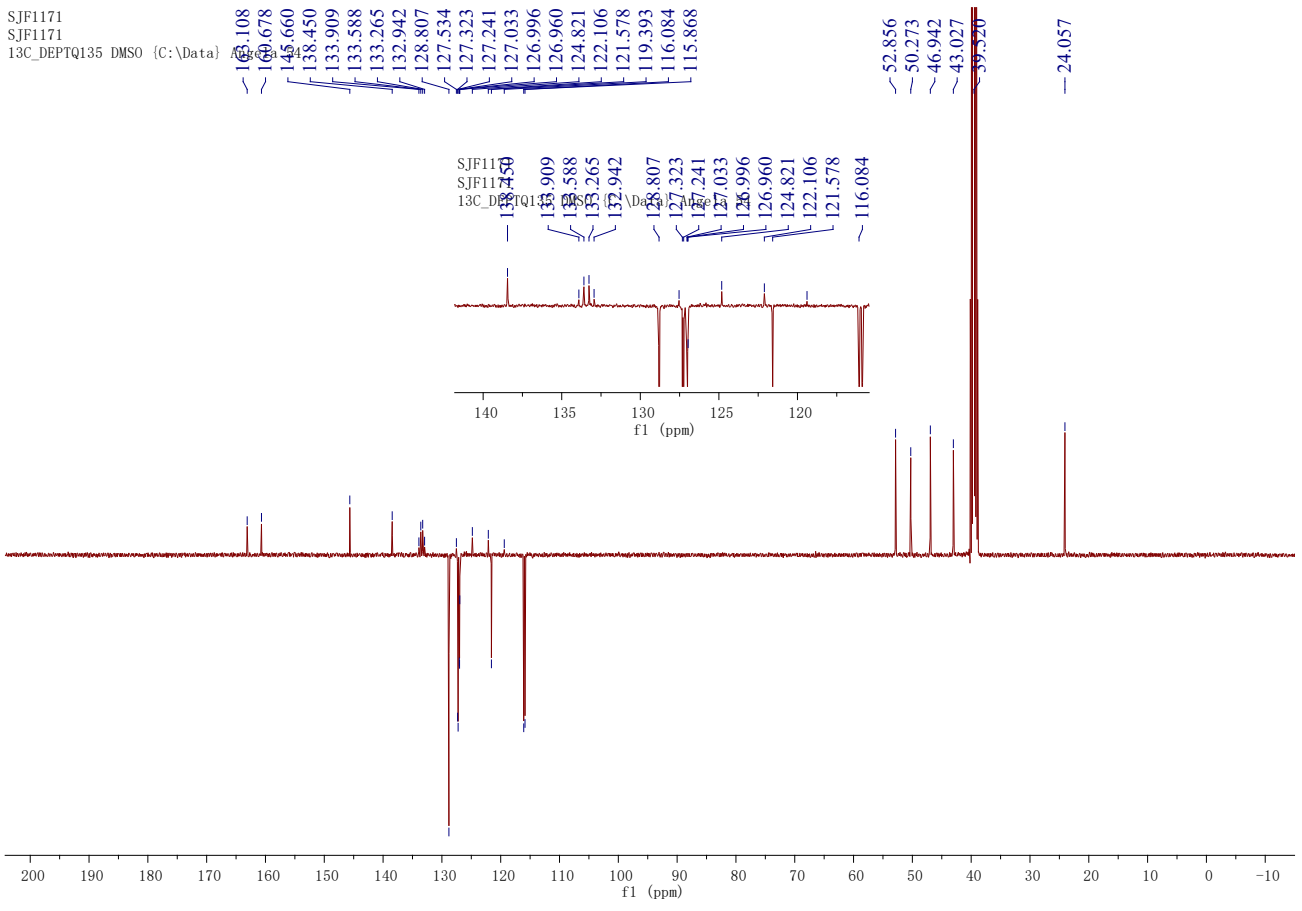

SJF1171

F19CPD DMSO {C:\Data} Ccc 10

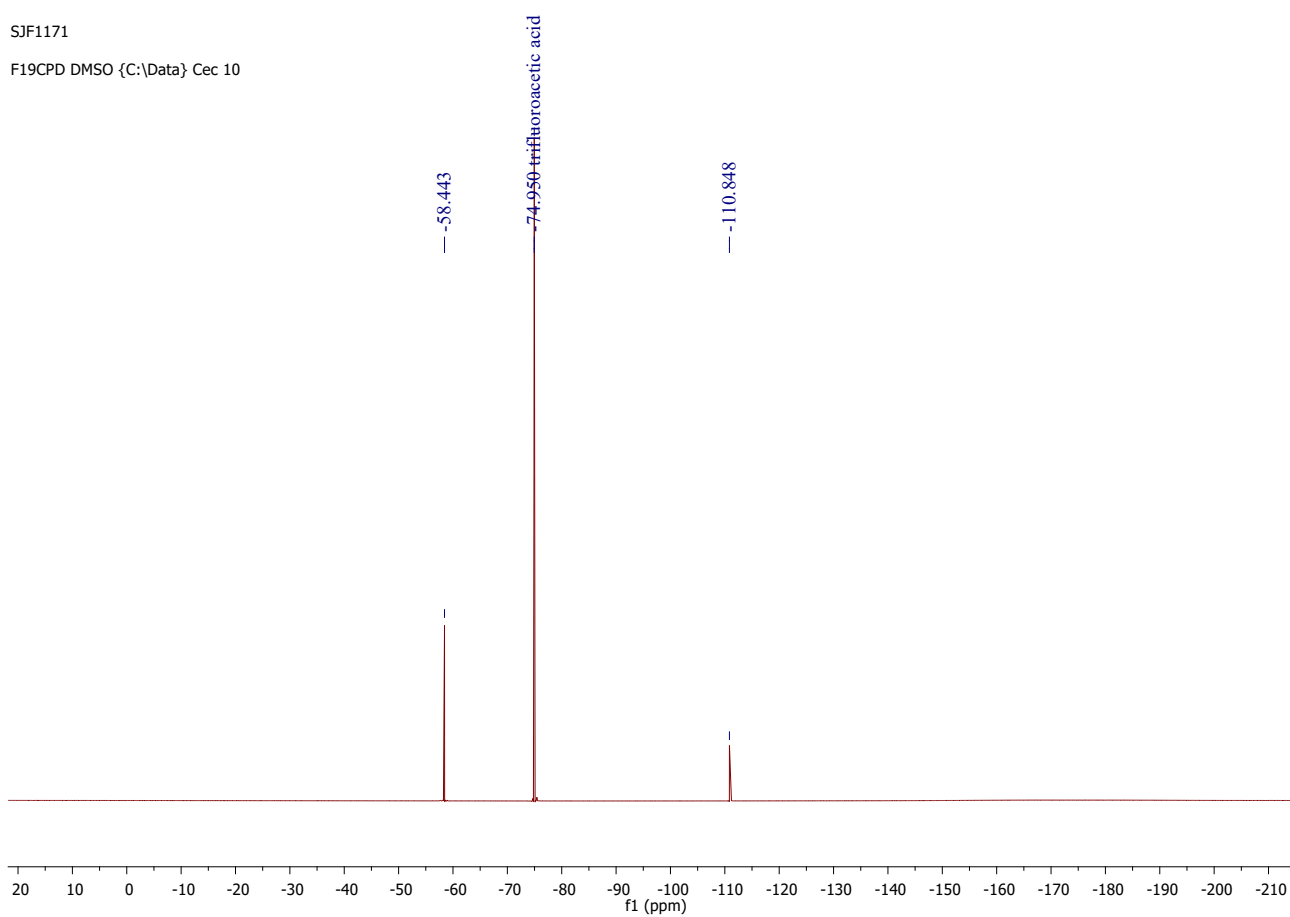

1-(3-(4-(4-Bromophenyl)-1H-1,2,3-triazol-1-yl)propyl)-4-((4-(trifluoromethyl)phenyl)sulfonyl)piperazine hydrochloride  
**(38)**

SJF1175

PROTON DMSO (C:\Data) Angela 45

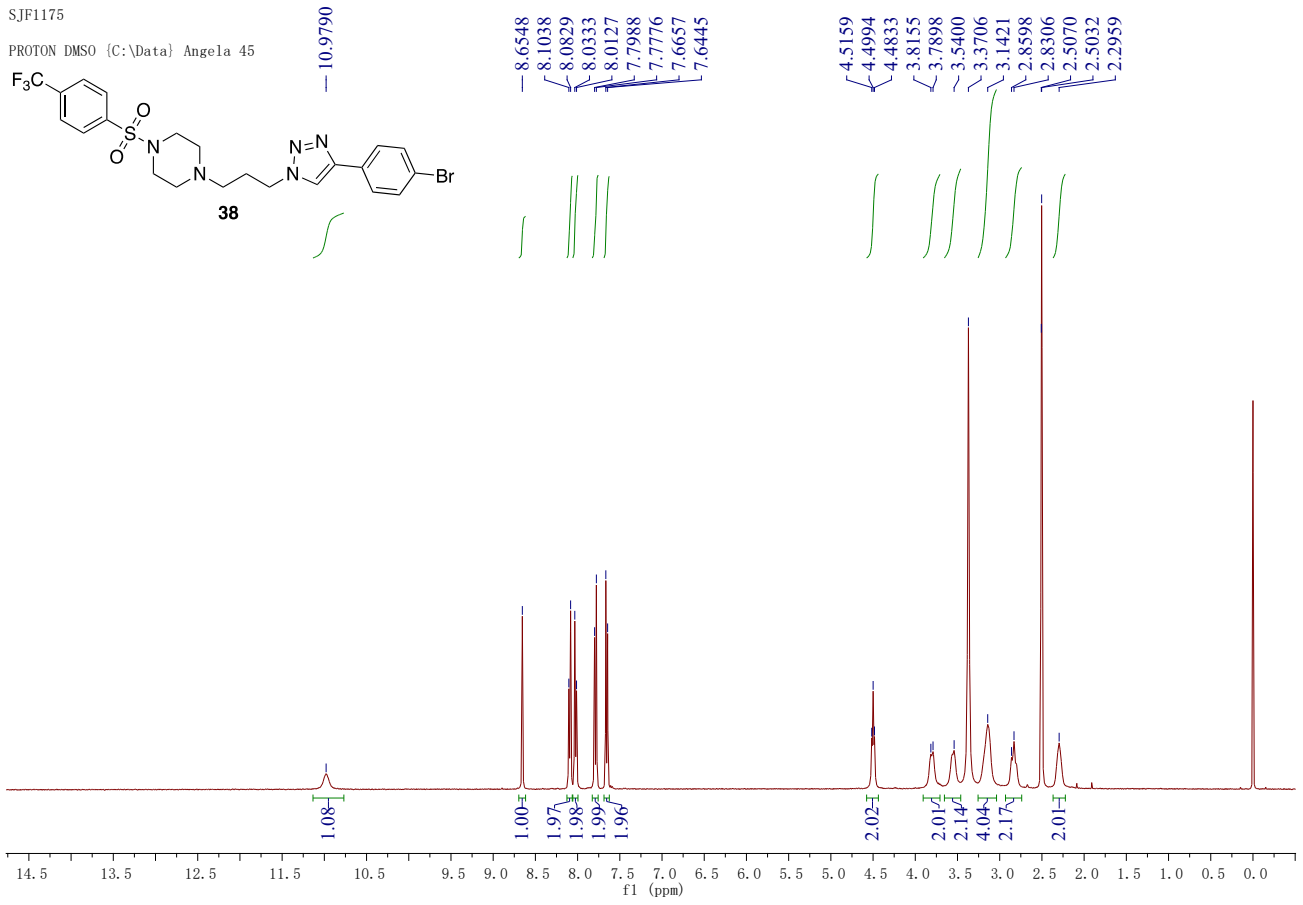

SJF1175A

13C\_DEPTQ135 DMSO {C:\Dat

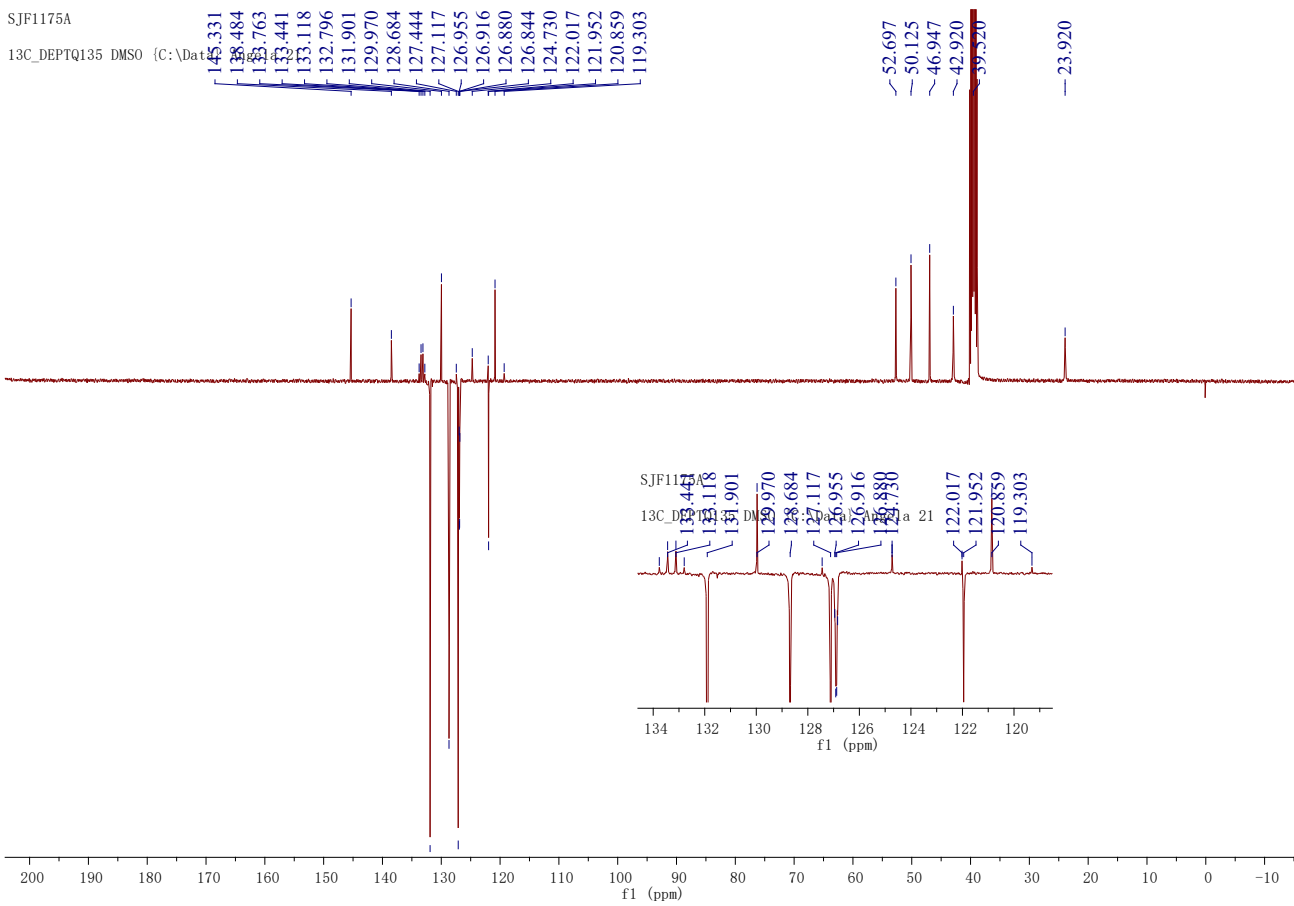

SF1175

F19CPD DMSO {C:\Data} Cec 16

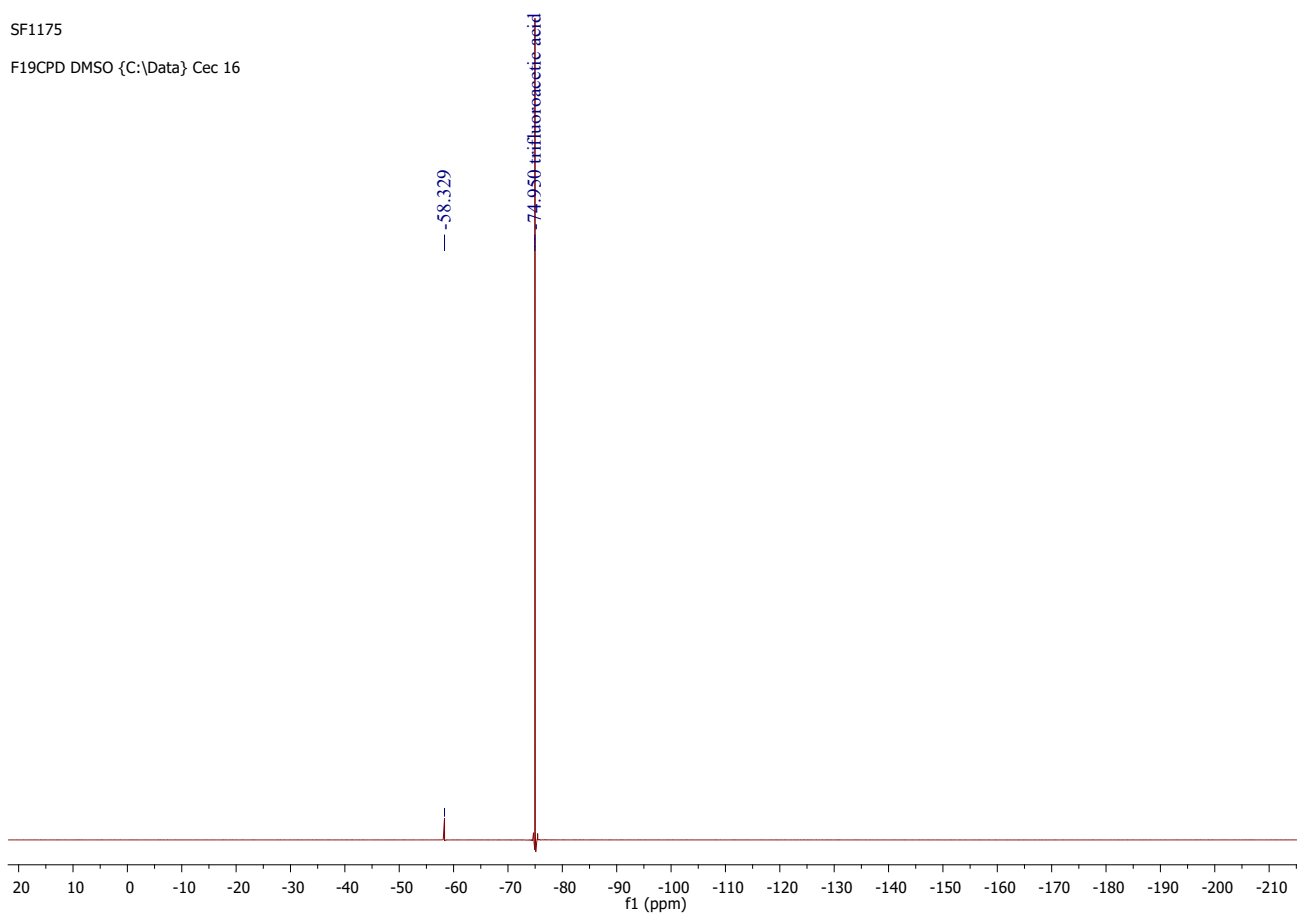



1-(3-(4-(3-Chlorophenyl)-1H-1,2,3-triazol-1-yl)propyl)-4-((4-(trifluoromethyl)-phenyl)sulfonyl)piperazine hydrochloride  
(39)

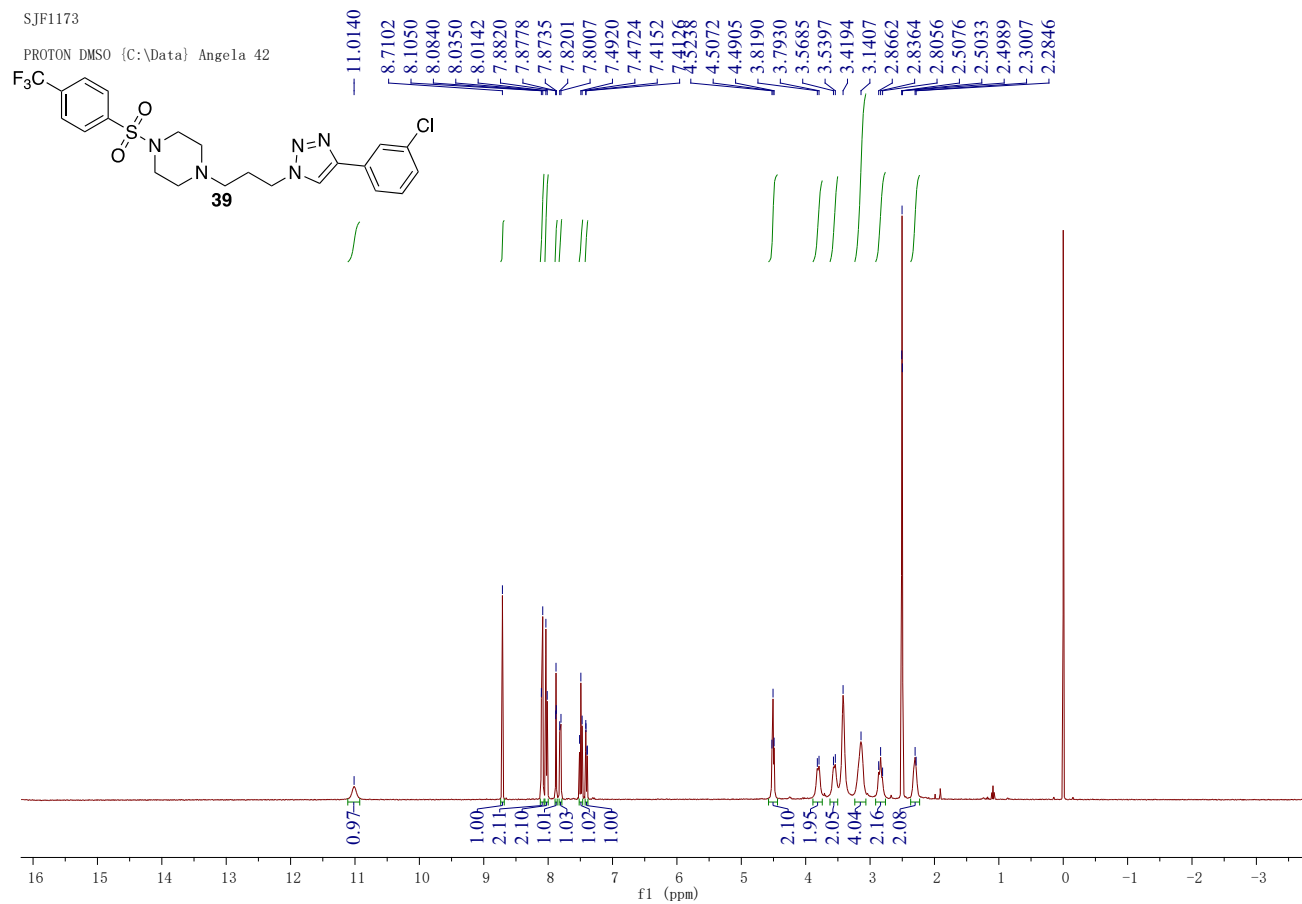

SJF1173B

13C\_DEPTQ135 DMSO (C:

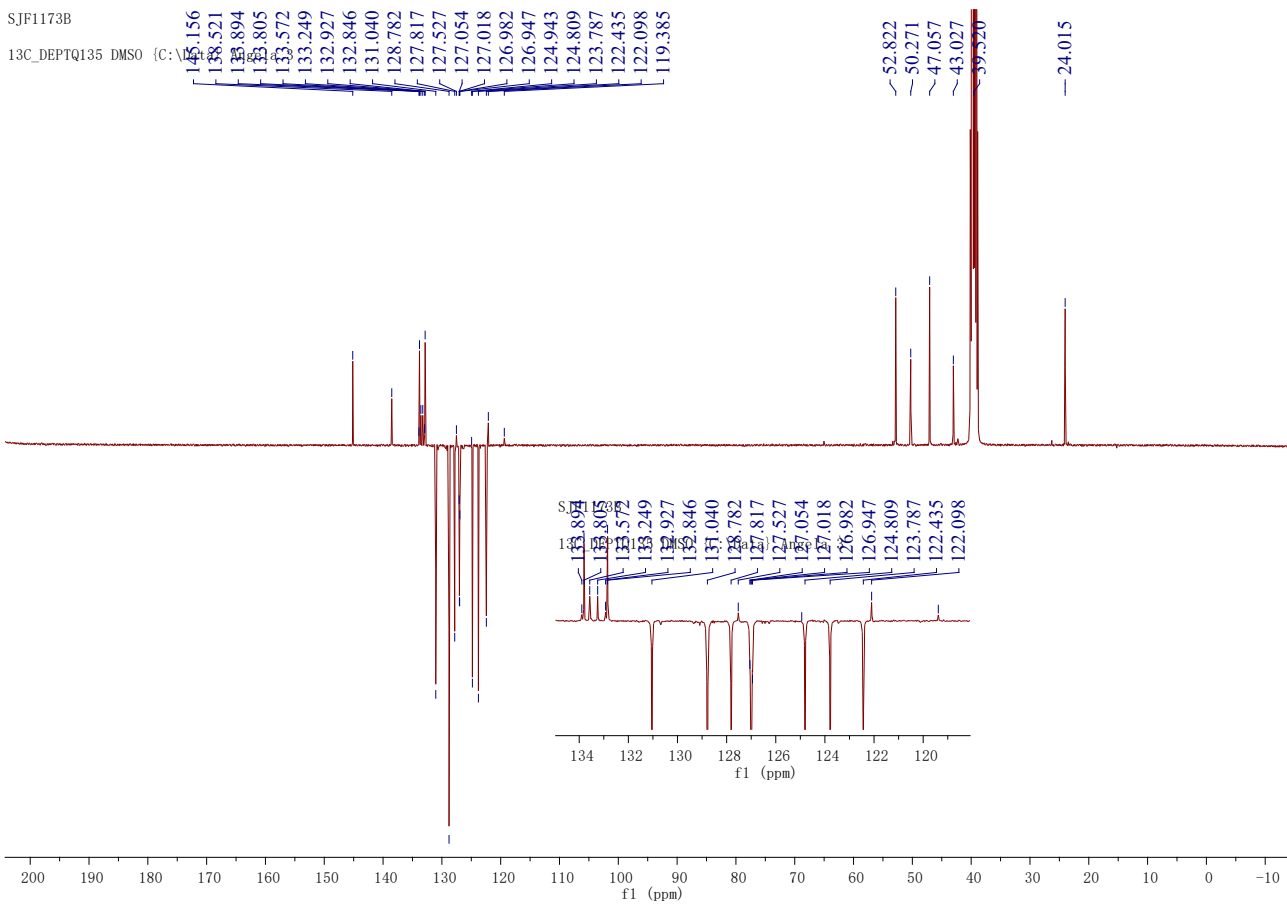

SJF1173

F19CPD DMSO {C:\Data} Cec 27

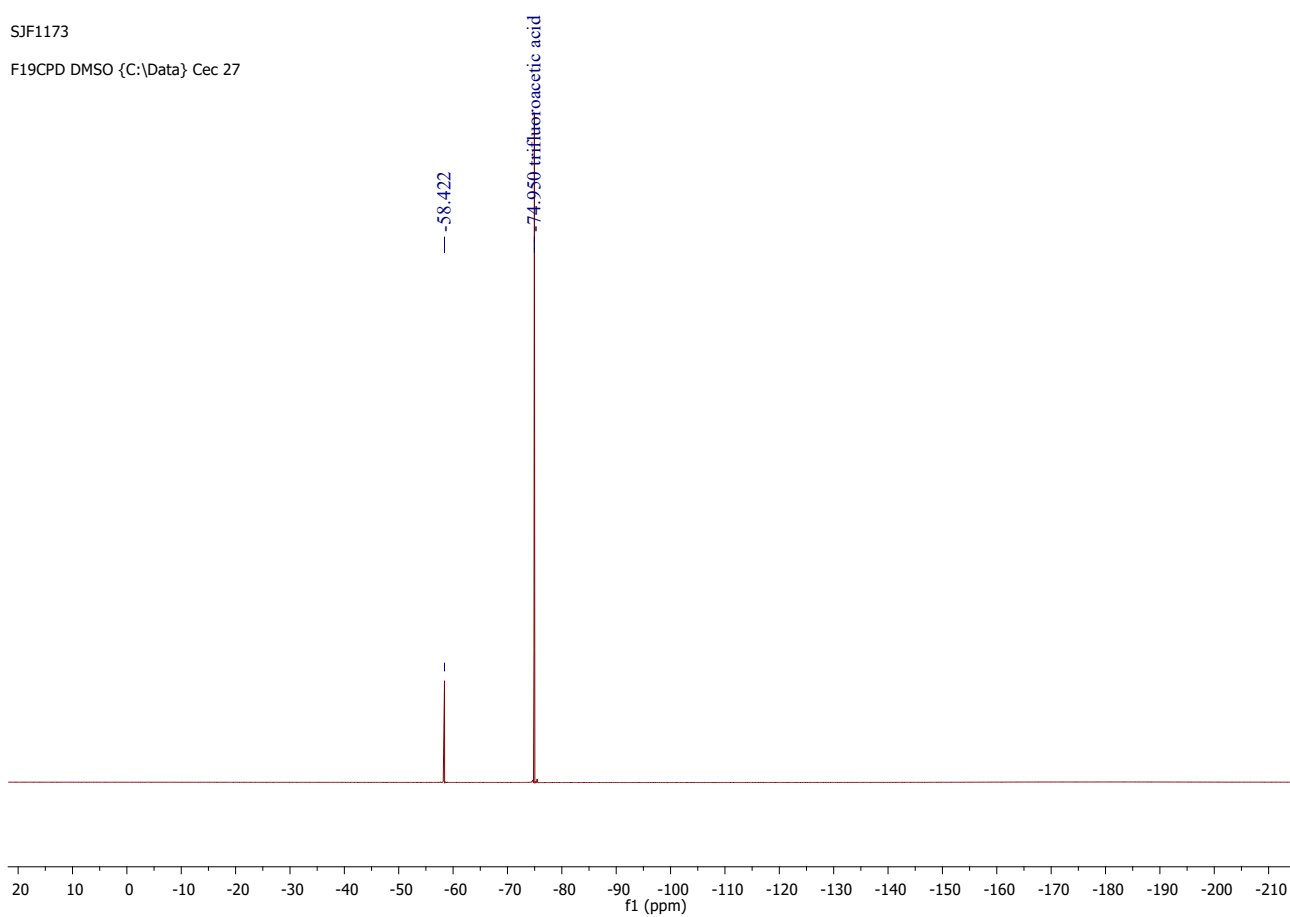

1-(4-Trifluoromethylbenzenesulfonyl)-4-{3-[4-(4-trifluoromethylphenyl)-[1,2,3]-triazol-1-yl]-propyl}-piperazine hydrochloride (**40**)

SJF1174

PROTON DMSO (C:\Data) Angela 48

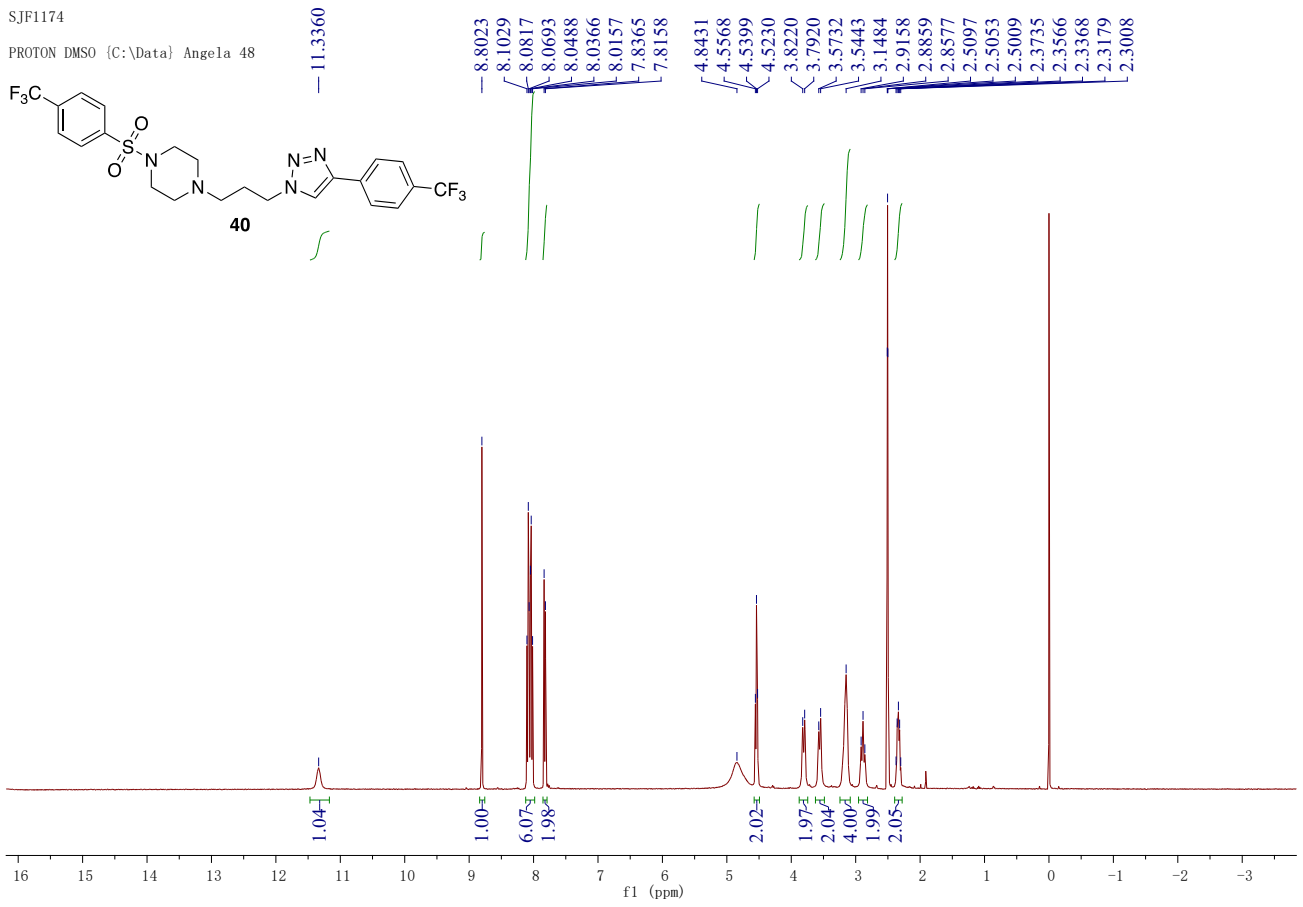

SJF1174  
SJF1174  
13C\_DEPTQ135 DM

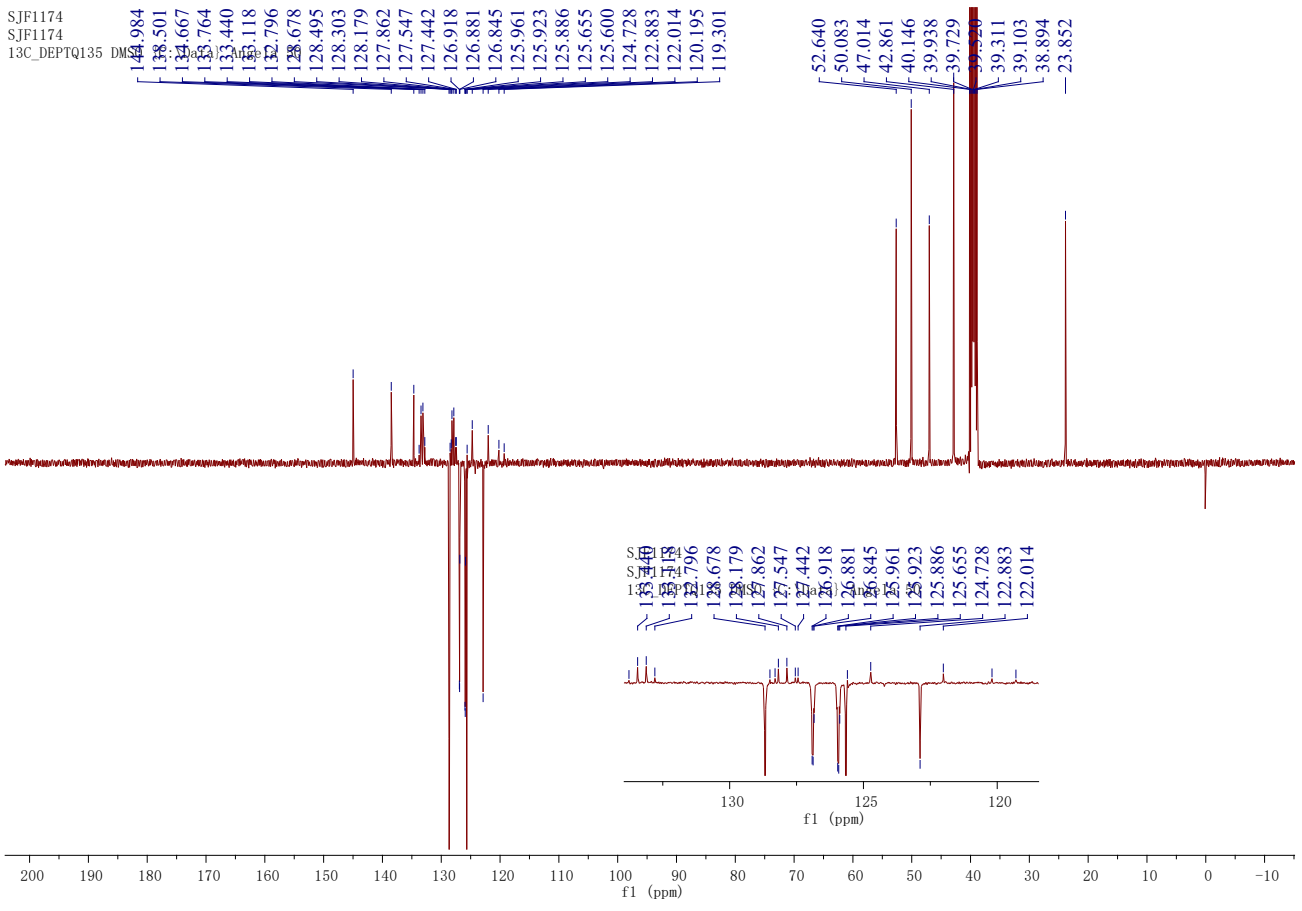

SJF1174

F19CPD DMSO {C:\Data} Cec 25

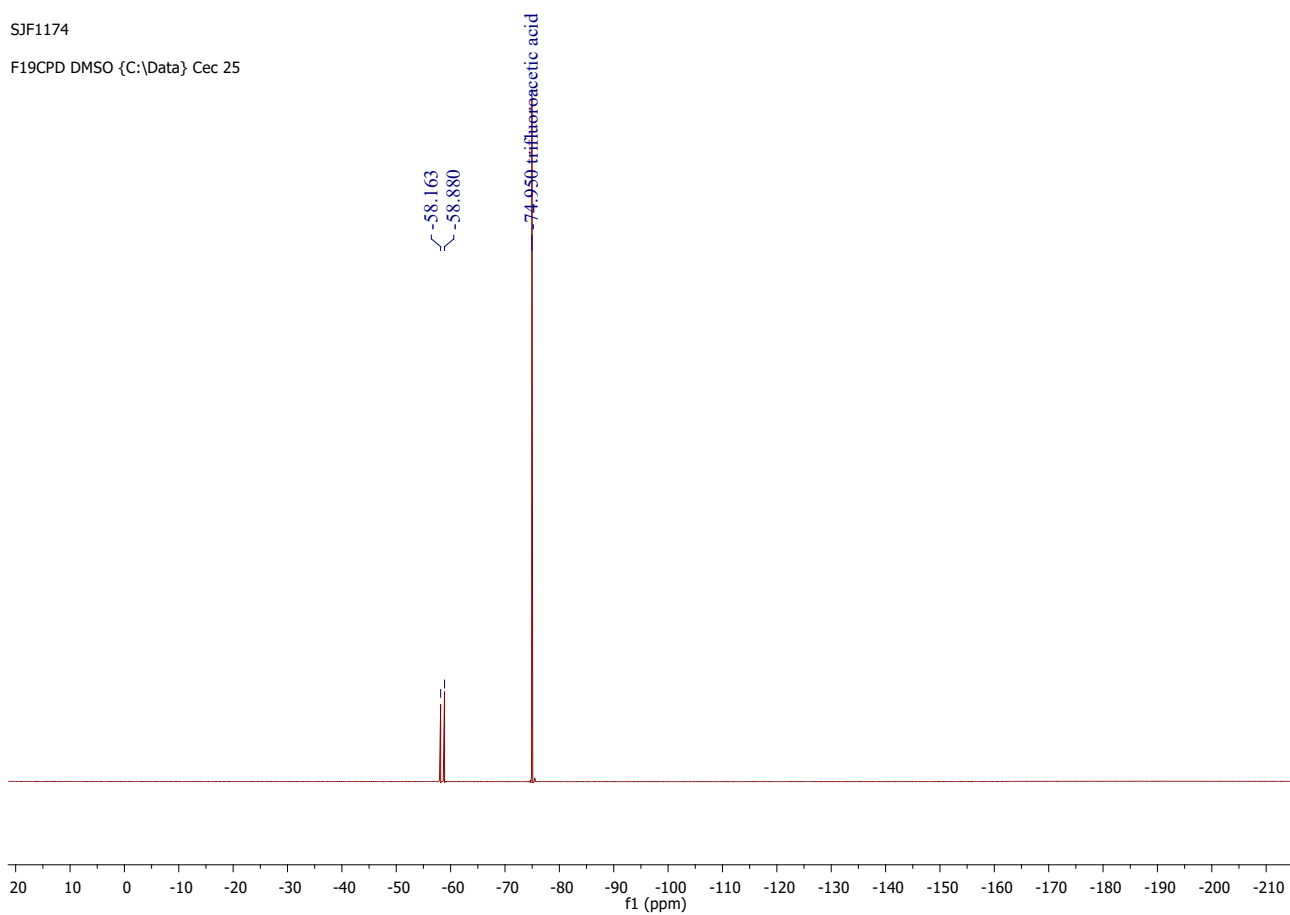

1-(3-(4-(4-Nitrophenyl)-1H-1,2,3-triazol-1-yl)propyl)-4-((4-(trifluoromethyl)-phenyl)sulfonyl)piperazine hydrochloride  
(41)

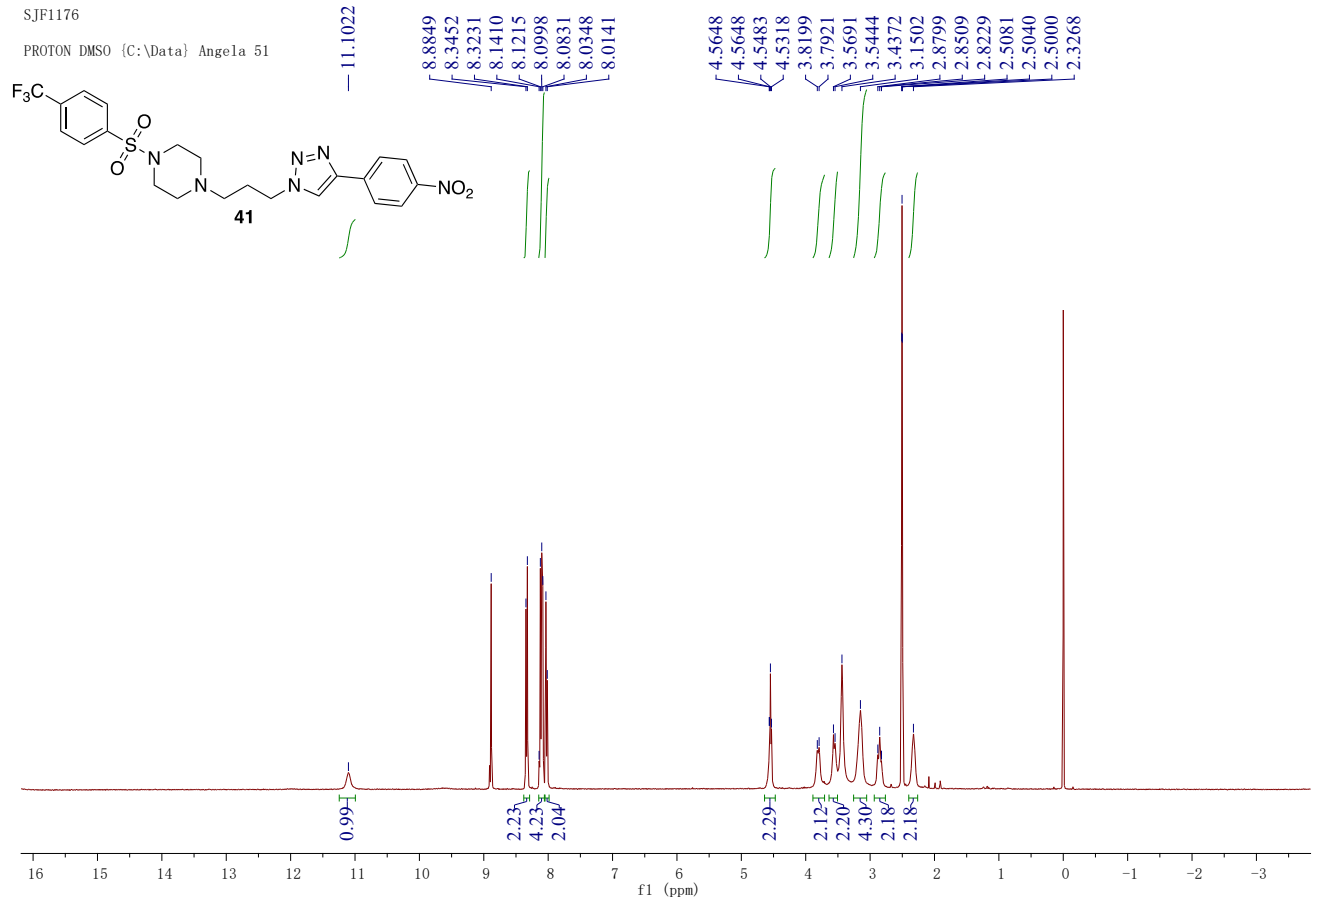

SJF1176  
SJF1176  
13C\_DEPTQ135 DMSO {C:\Data

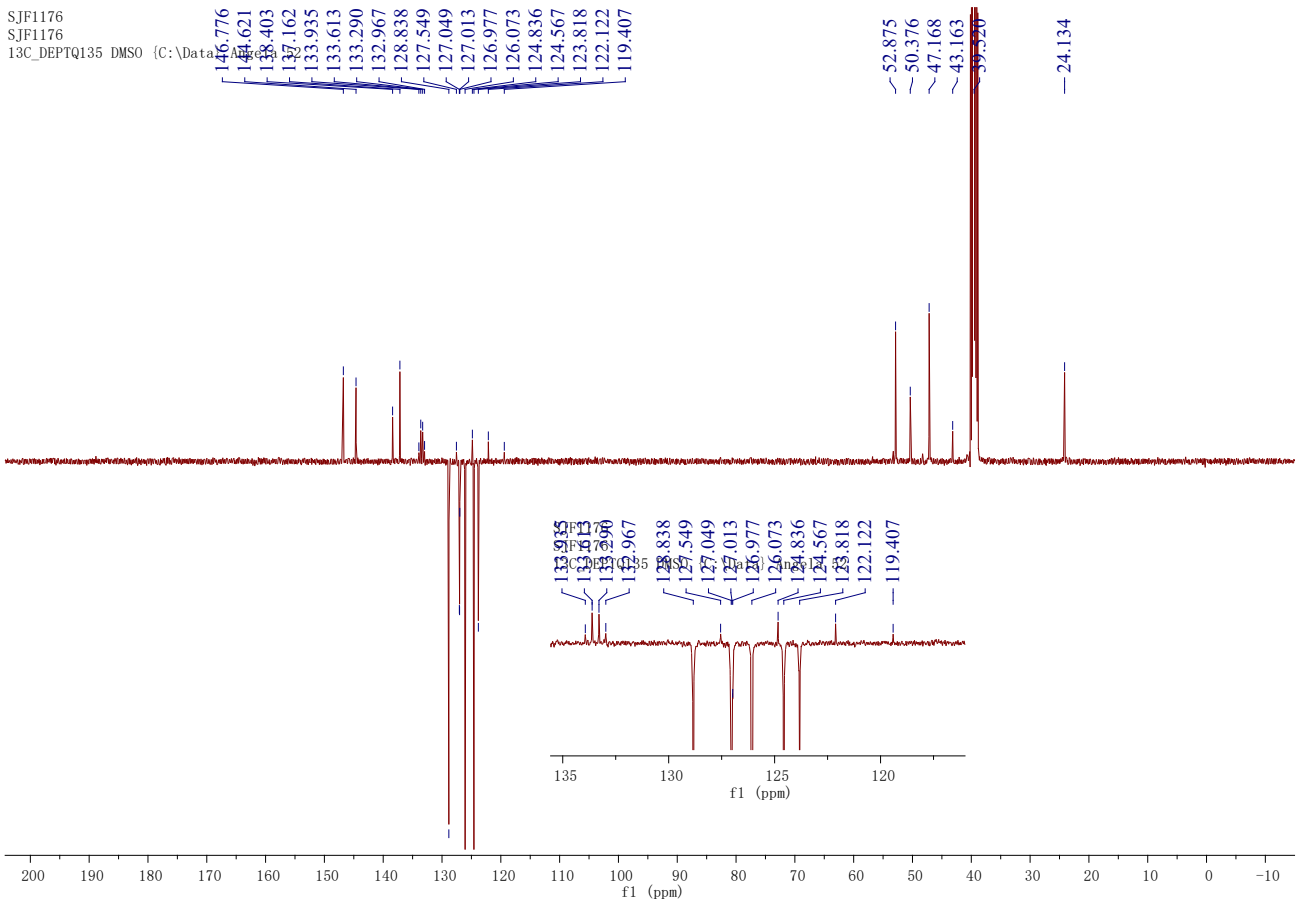



SJF1176

F19CPD DMSO {C:\Data} Ccc 30

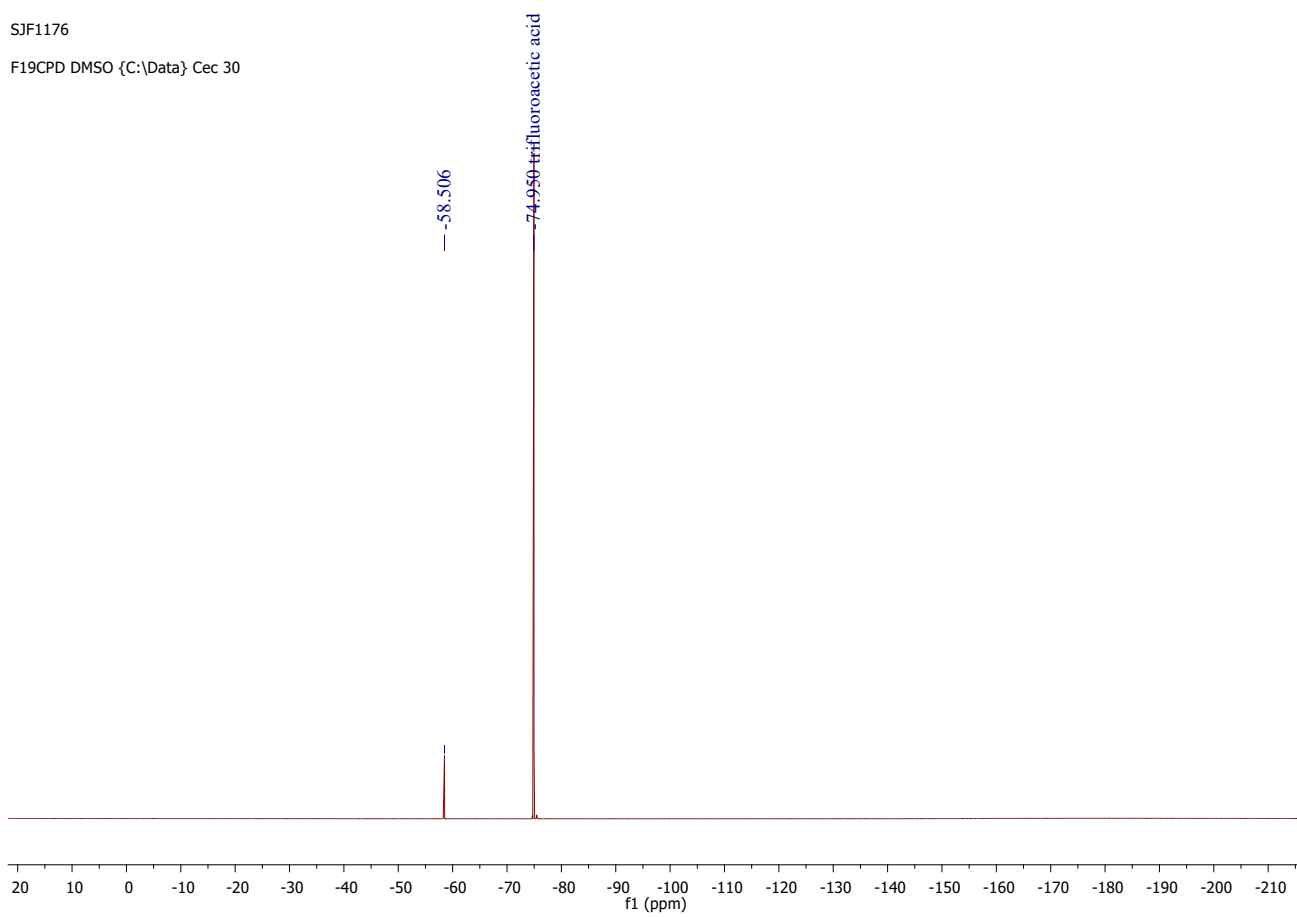

***N,N*-Dimethyl-4-(1-(3-(4-((4-(trifluoromethyl)phenyl)sulfonyl)piperazin-1-yl)-propyl)-1H-1,2,3-triazol-4-yl)aniline hydrochloride (42)**

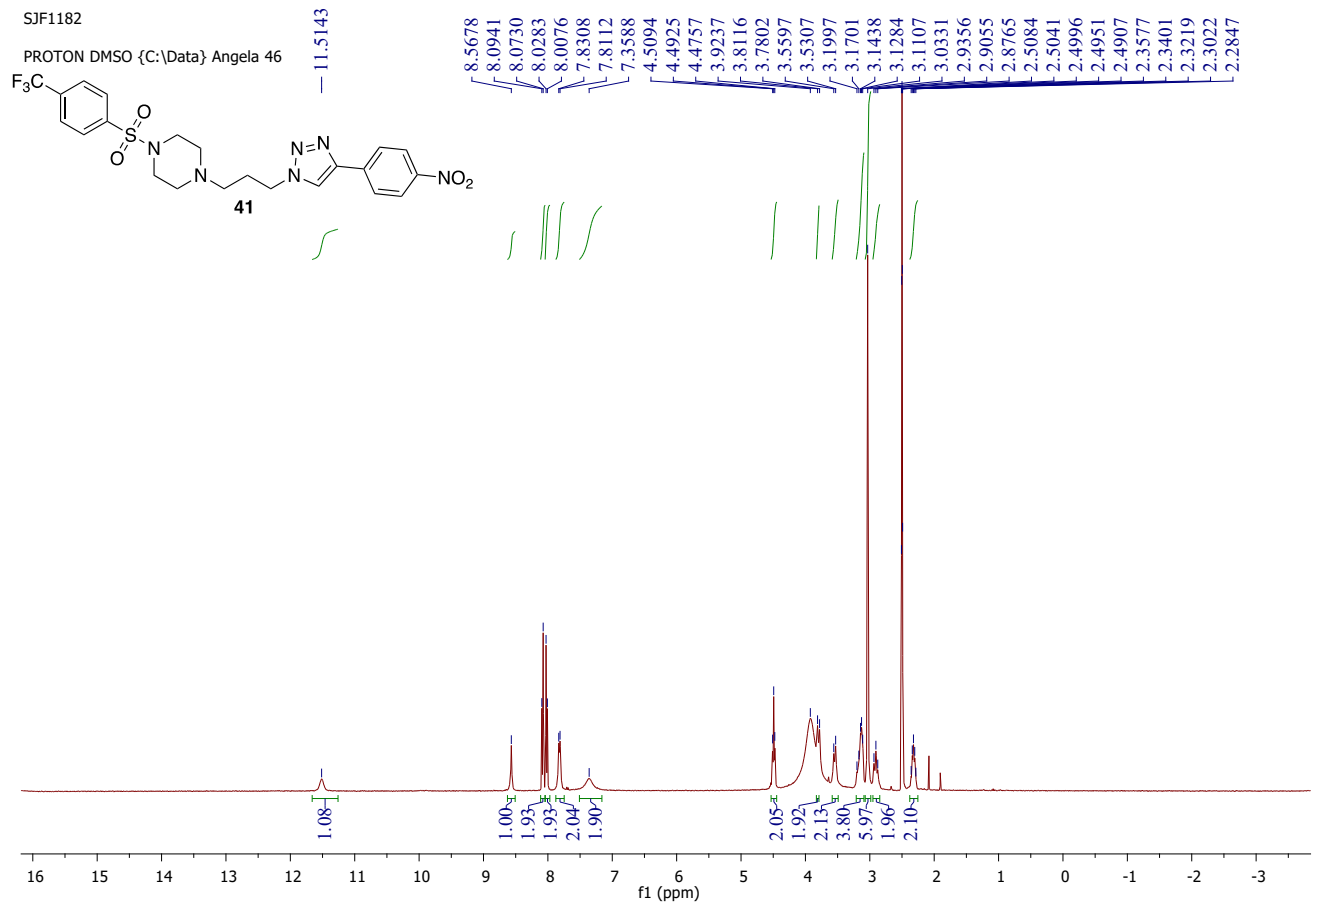

SJF1182

13C\_DEPTQ135 DMSO (C:\Data\Angel

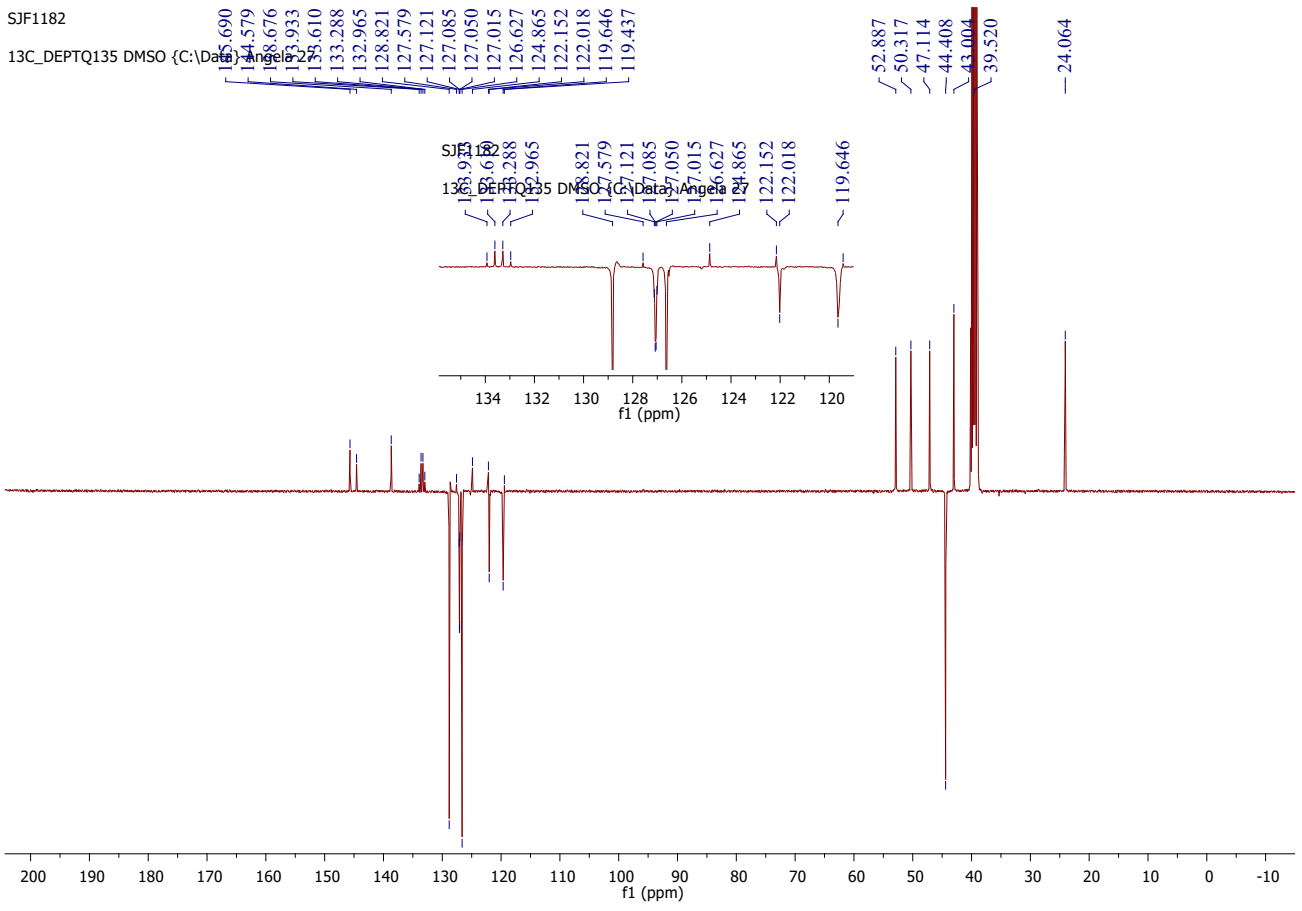

SJF1182

F19CPD DMSO {C:\Data} Cec 26

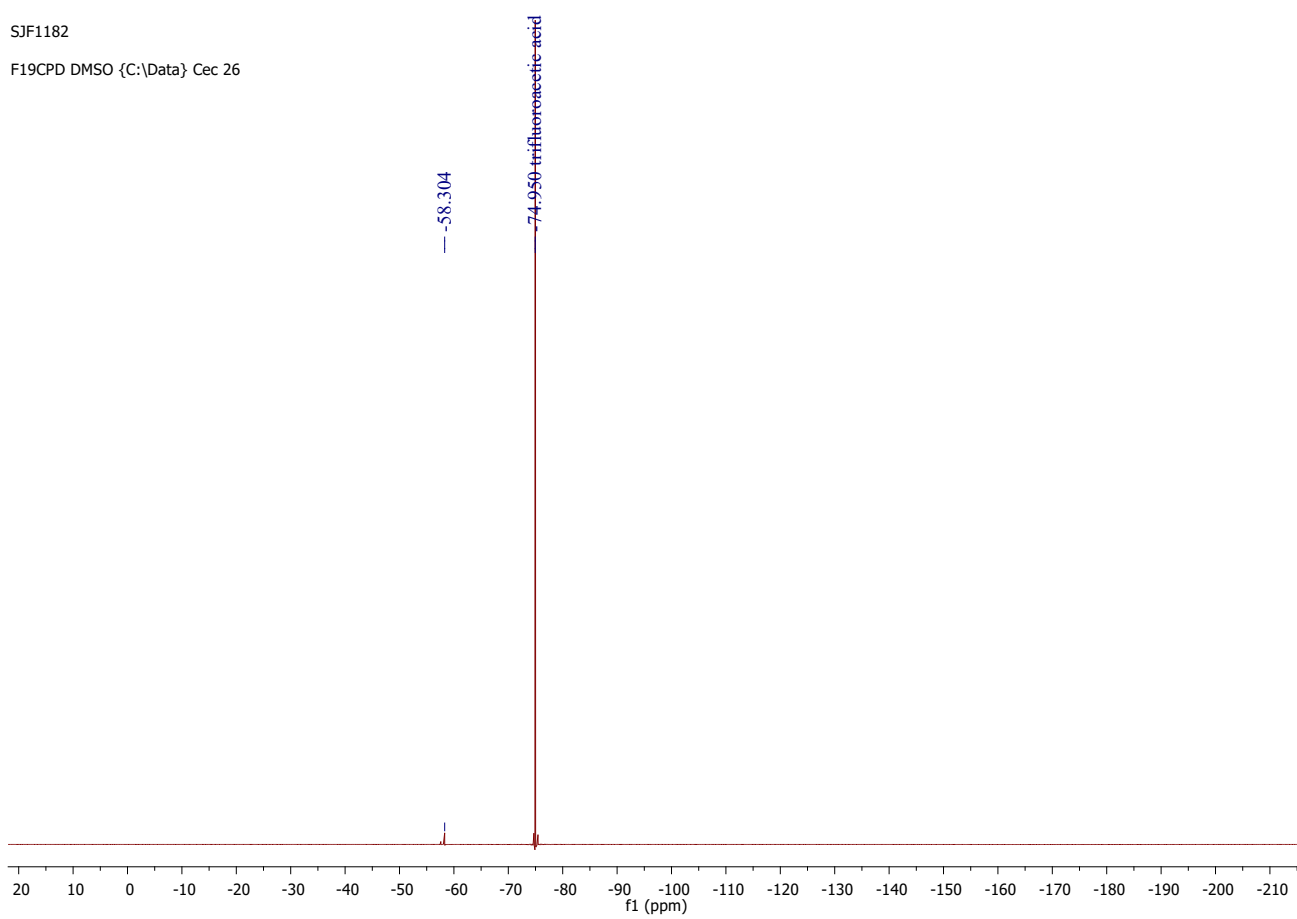

1-[3-(4-p-Tolyl-[1,2,3]triazol-1-yl)-propyl]-4-(2-trifluoromethylbenzenesulfonyl)-piperazine hydrochloride (43)

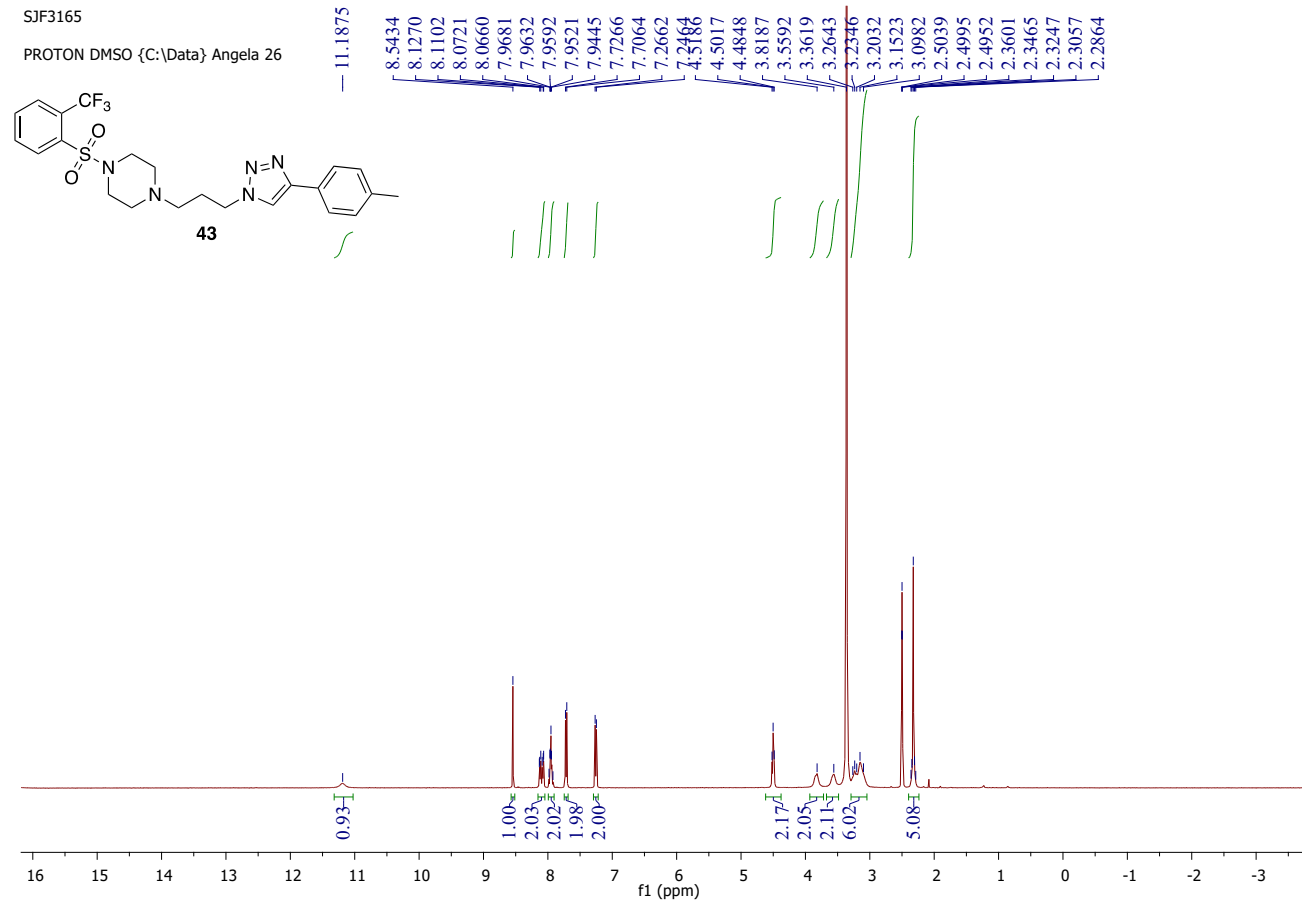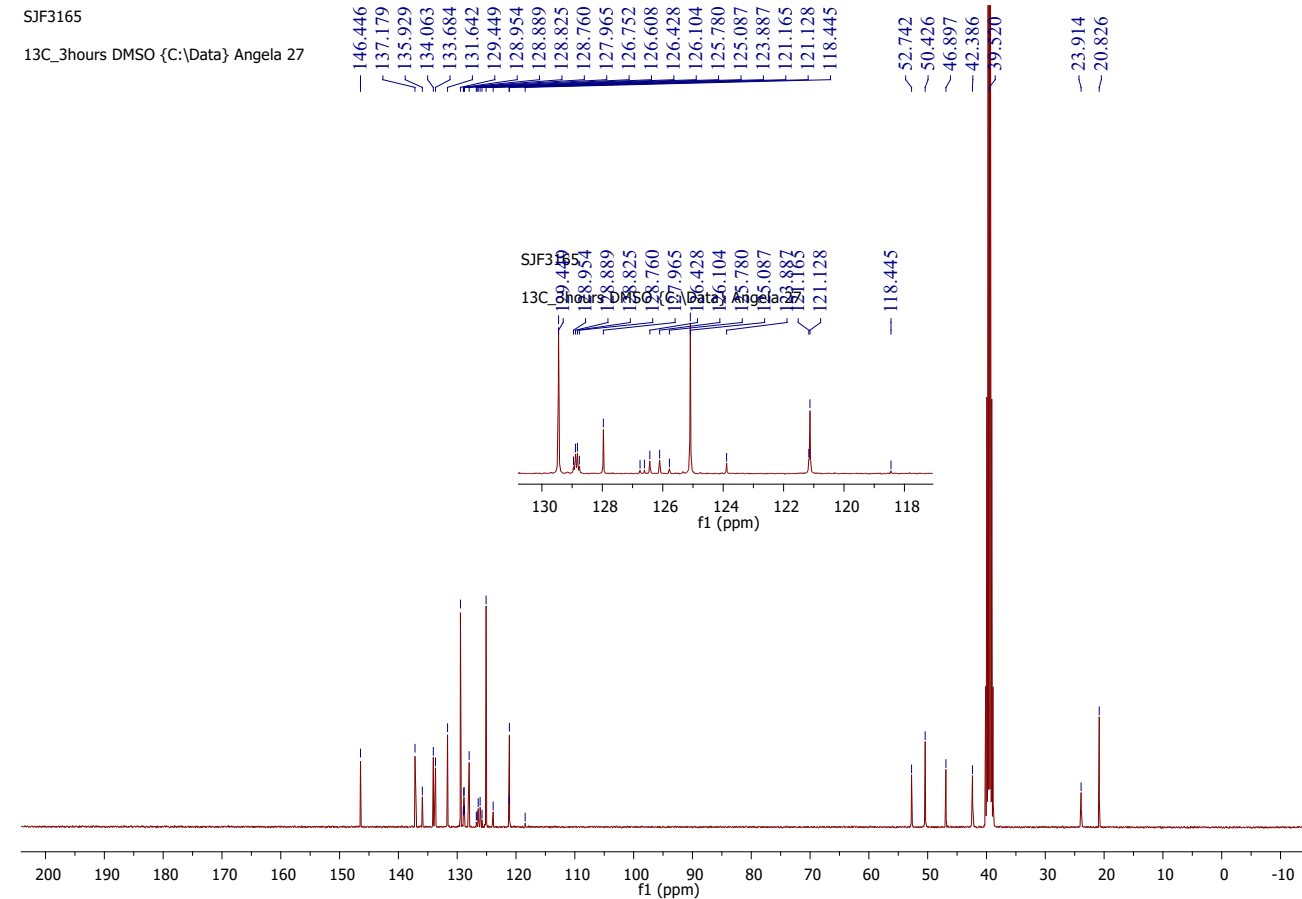

SJF3165

F19CPD DMSO {C:\Data} Angela 27

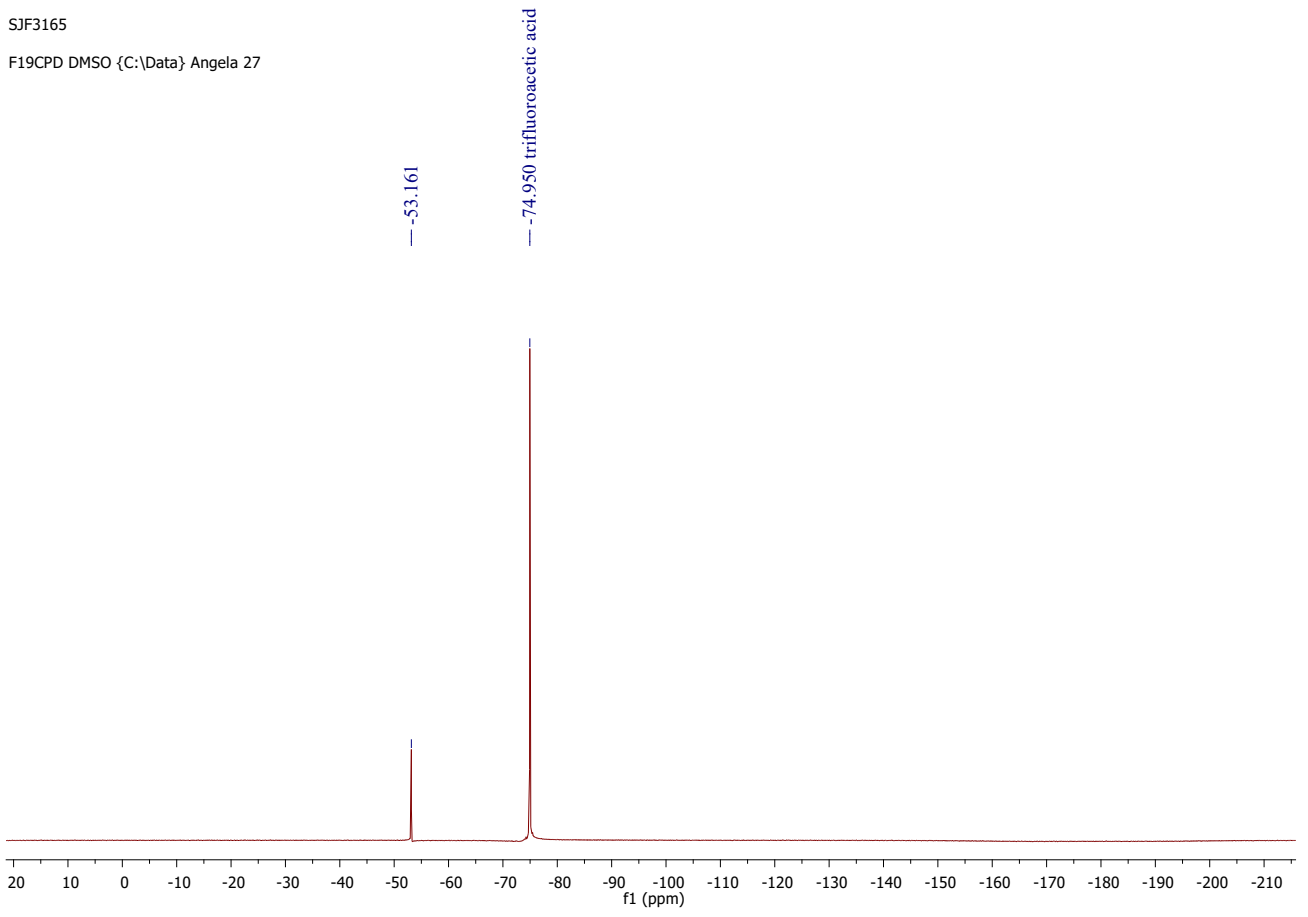

1-[3-[4-(4-Ethylphenyl)-[1,2,3]triazol-1-yl]-propyl]-4-(2-trifluoromethylbenzenesulfonyl)-piperazine hydrochloride (**44**)

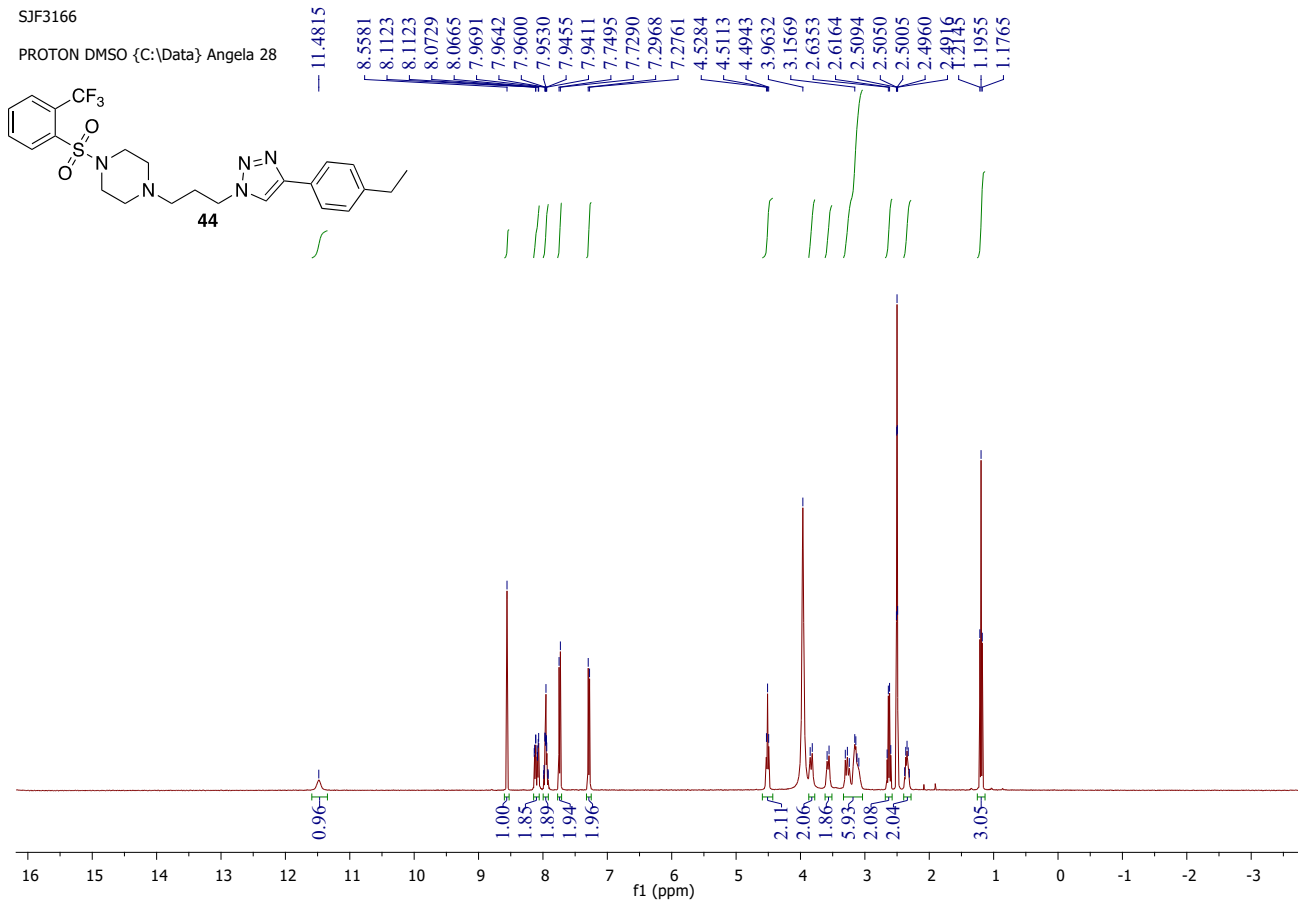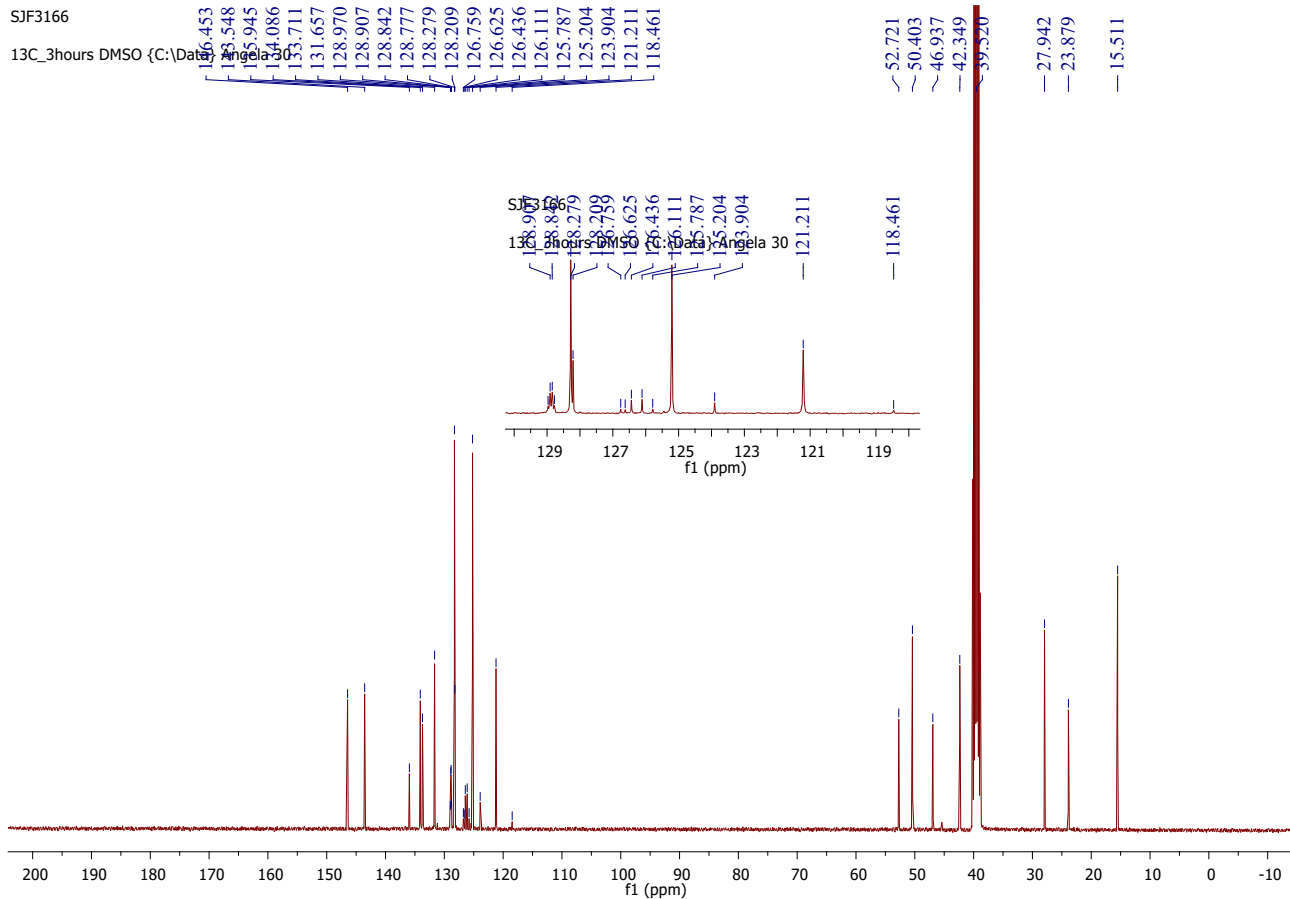

SJF3166

F19CPD DMSO {C:\Data} Angela 30

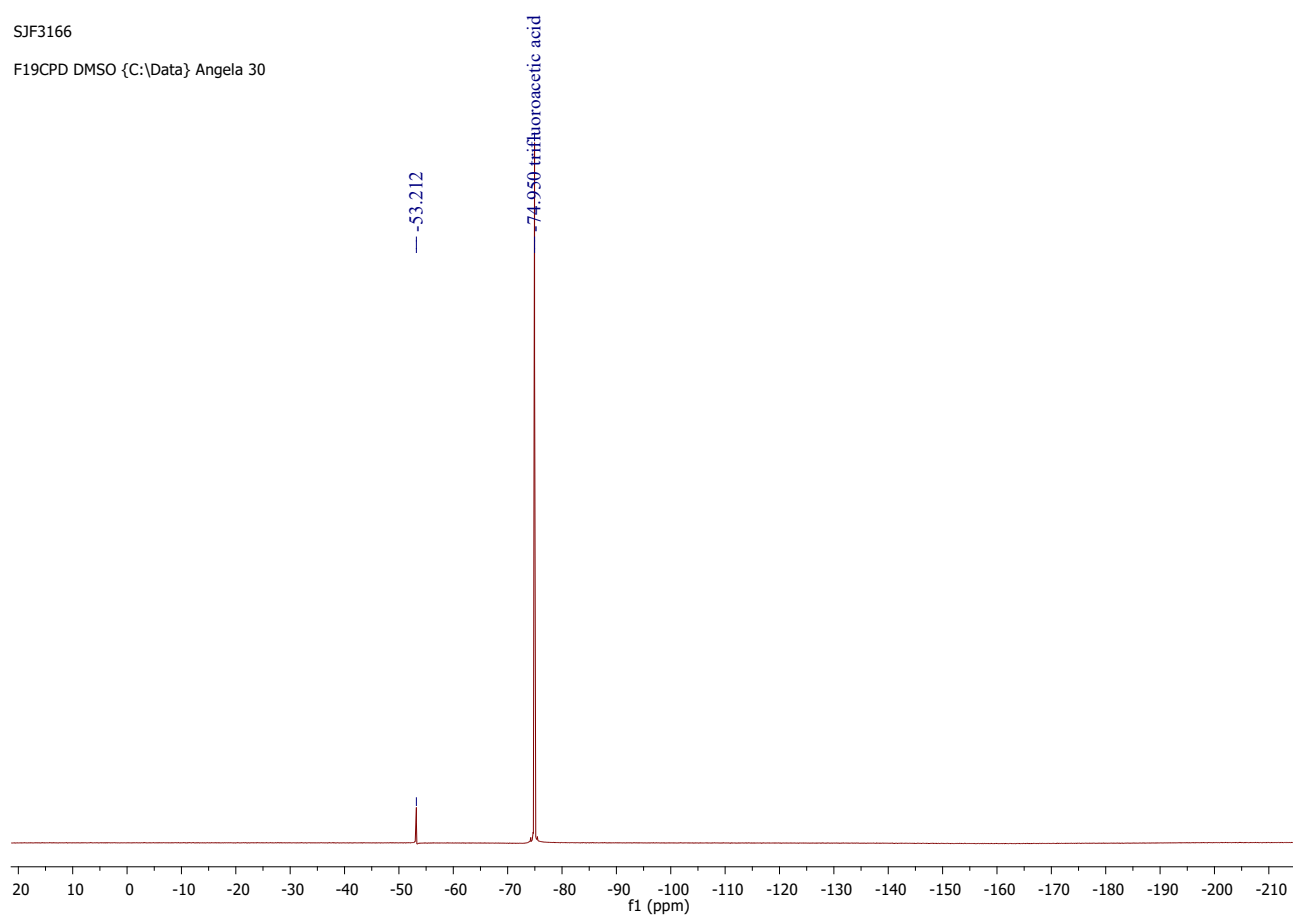



1-{3-[4-(4-Bromophenyl)-[1,2,3]triazol-1-yl]-propyl}-4-(2-trifluoromethylbenzene sulfonyl)-piperazine hydrochloride  
(45)

SJF3160

PROTON DMSO {C:\Data} Angela 60

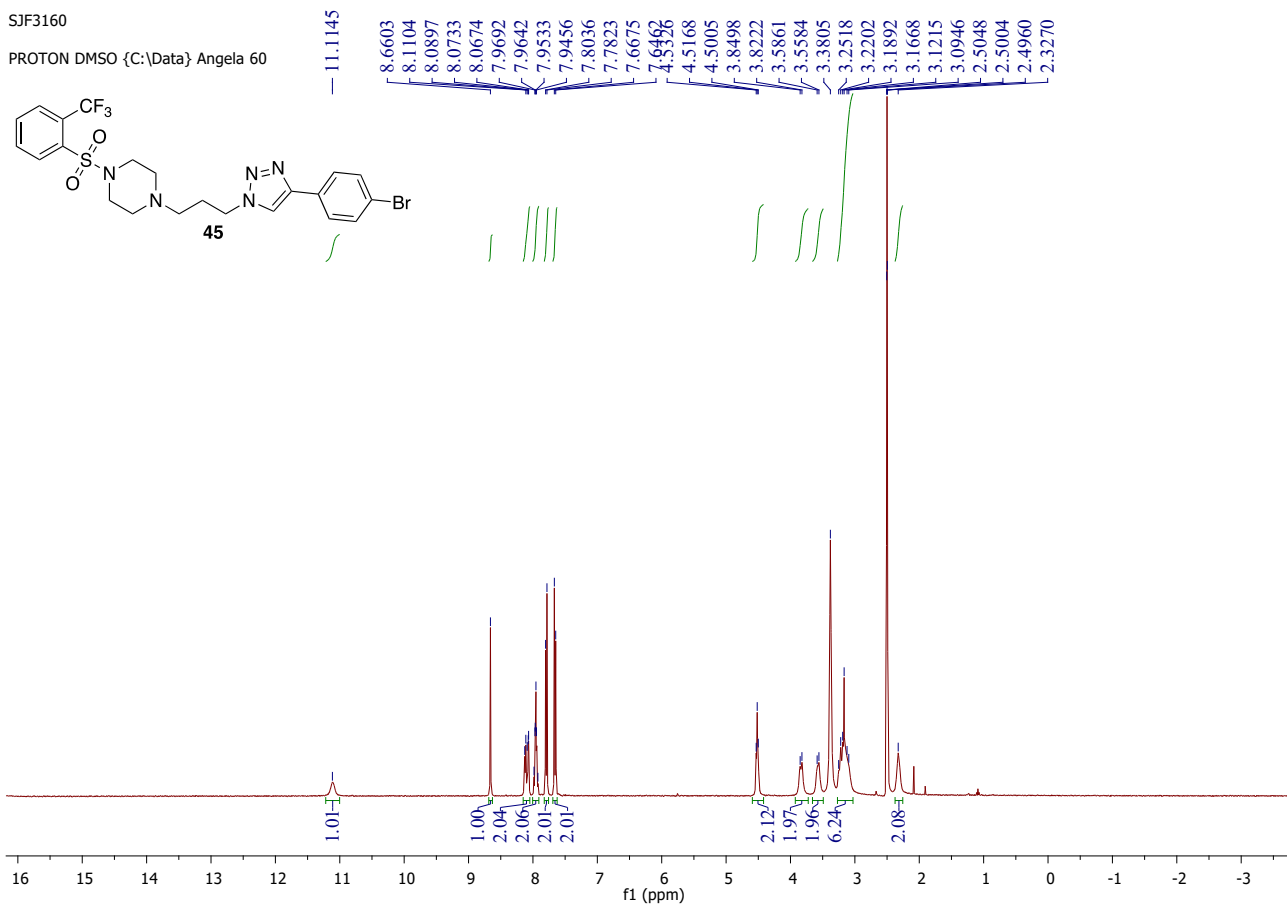

SJF3160

13C\_3hours DMSO (C:\Data) Angela 36

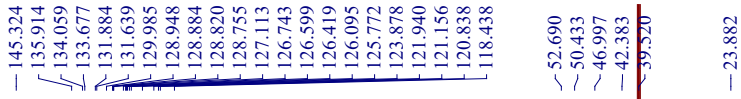

SJF3160

13C\_3hours DMSO (C:\Data) Angela 36

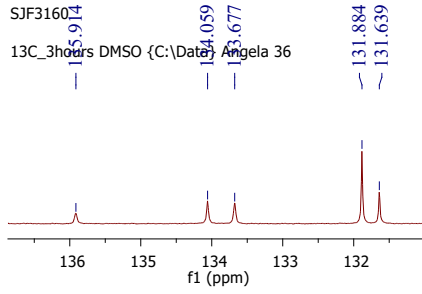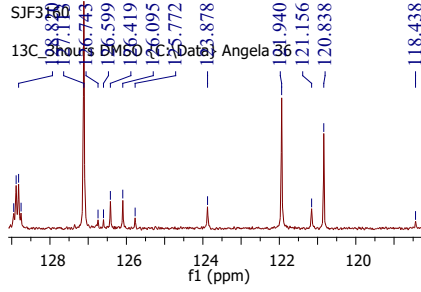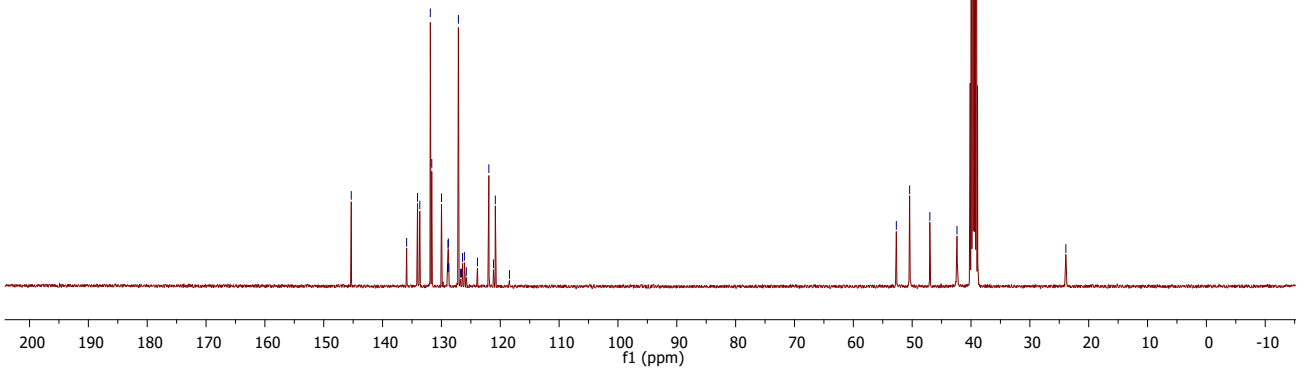

SJF3160

F19CPD DMSO {C:\Data} Angela 48

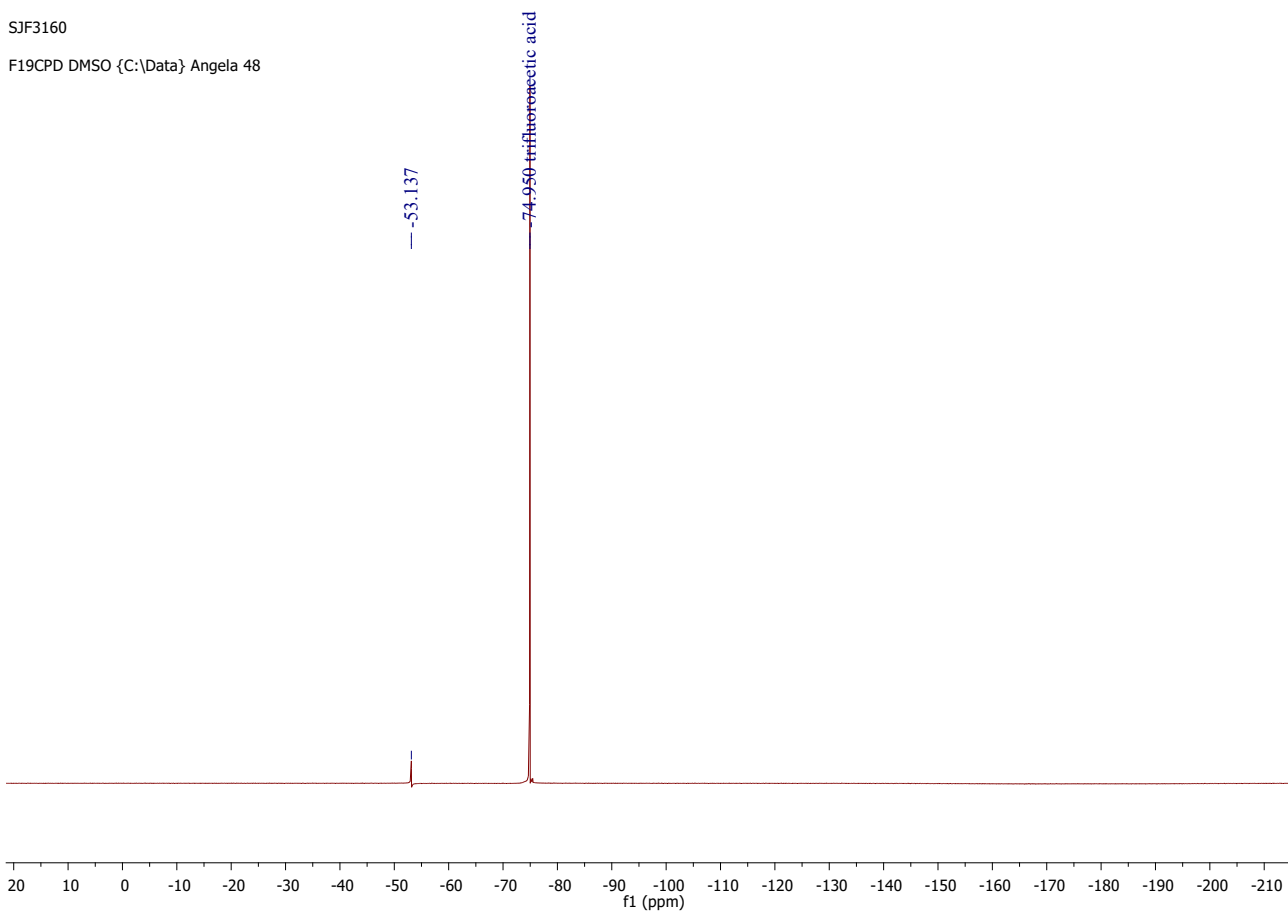

1-(2-Trifluoromethylbenzenesulfonyl)-4-{3-[4-(4-trifluoromethylphenyl)-[1,2,3]-triazol-1-yl]-propyl}-piperazine hydrochloride (**46**)

SJF3159

PROTON DMSO {C:\Data} Angela 57

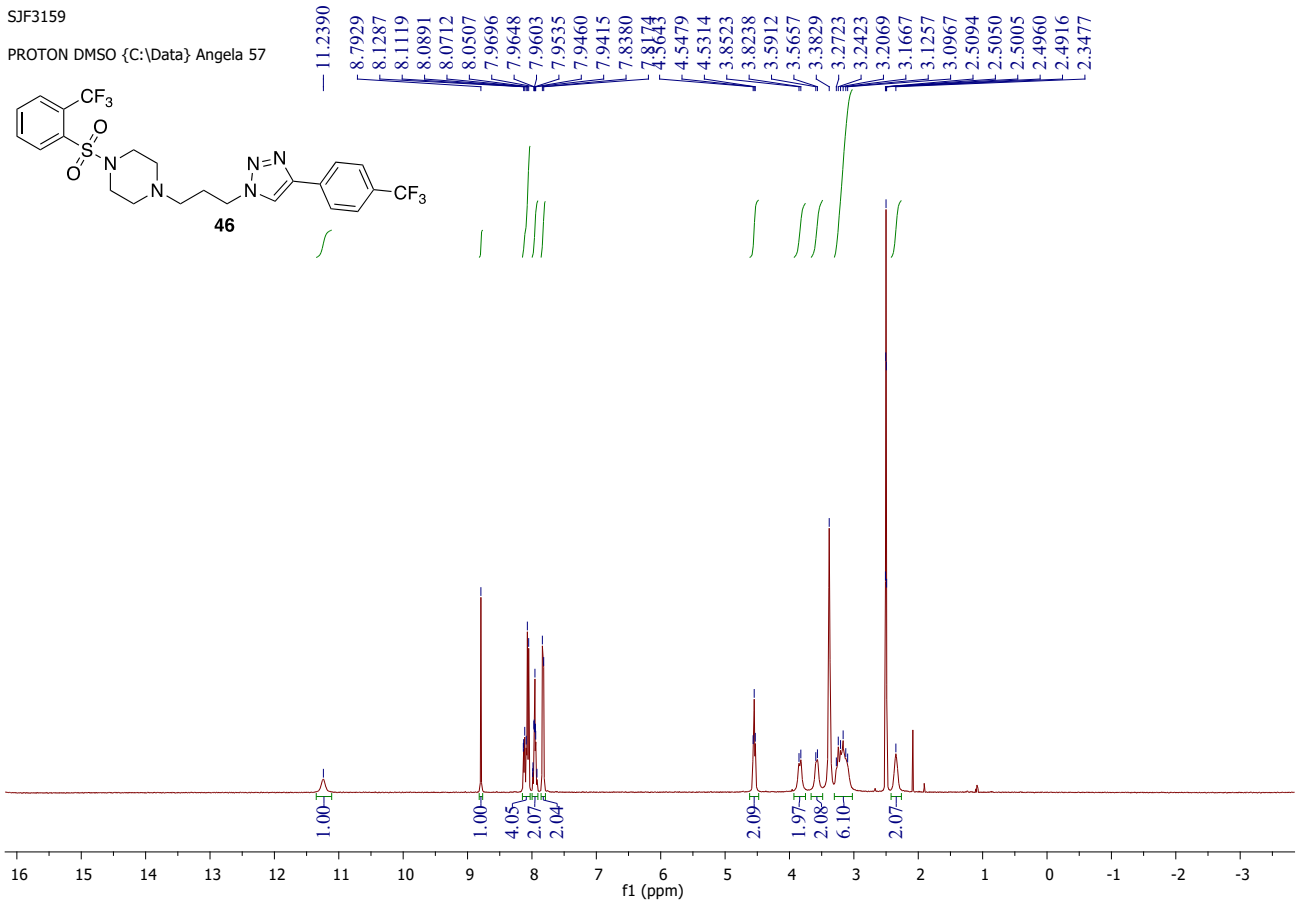

SJF3159

13C\_3hours DMSO (C:\Data) Angela 37

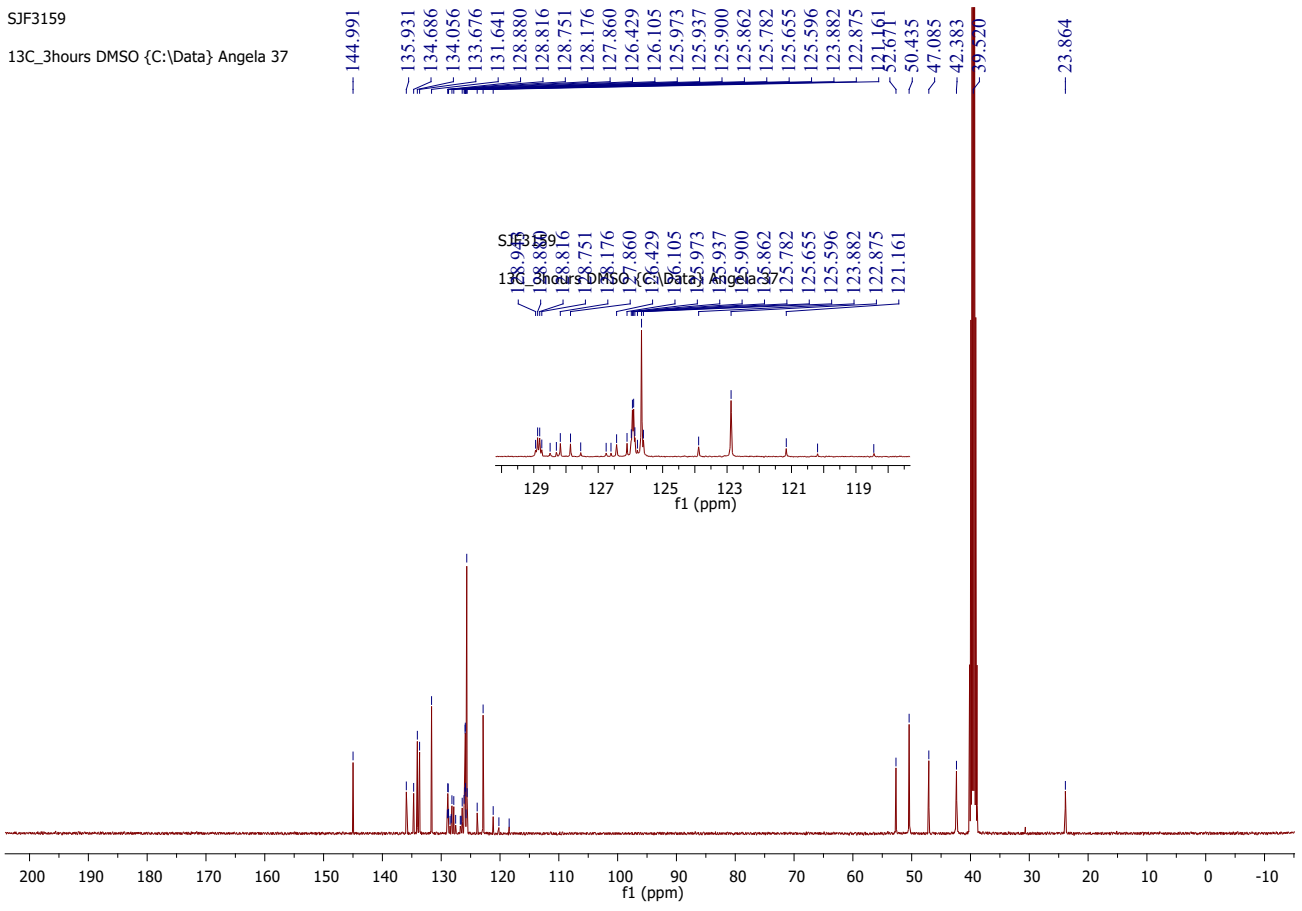

SJF3159

F19CPD DMSO {C:\Data} Angela 17

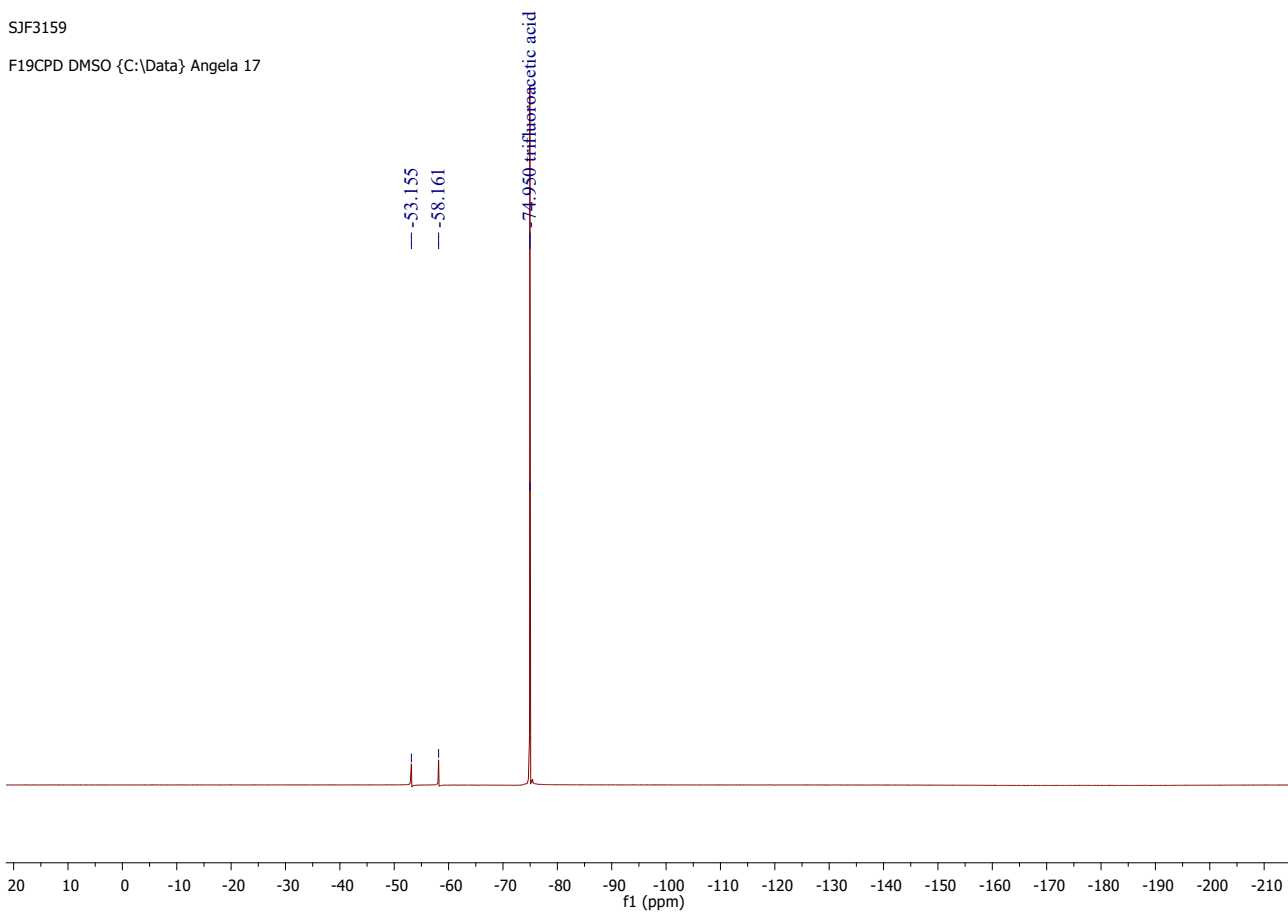

1-[3-(4-p-Tolyl-[1,2,3]triazol-1-yl)-propyl]-4-(3-trifluoromethylbenzenesulfonyl)-piperazine hydrochloride (47)

SJF3130-600  
temp 35deg d1=3

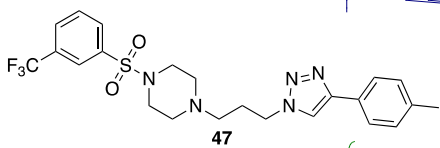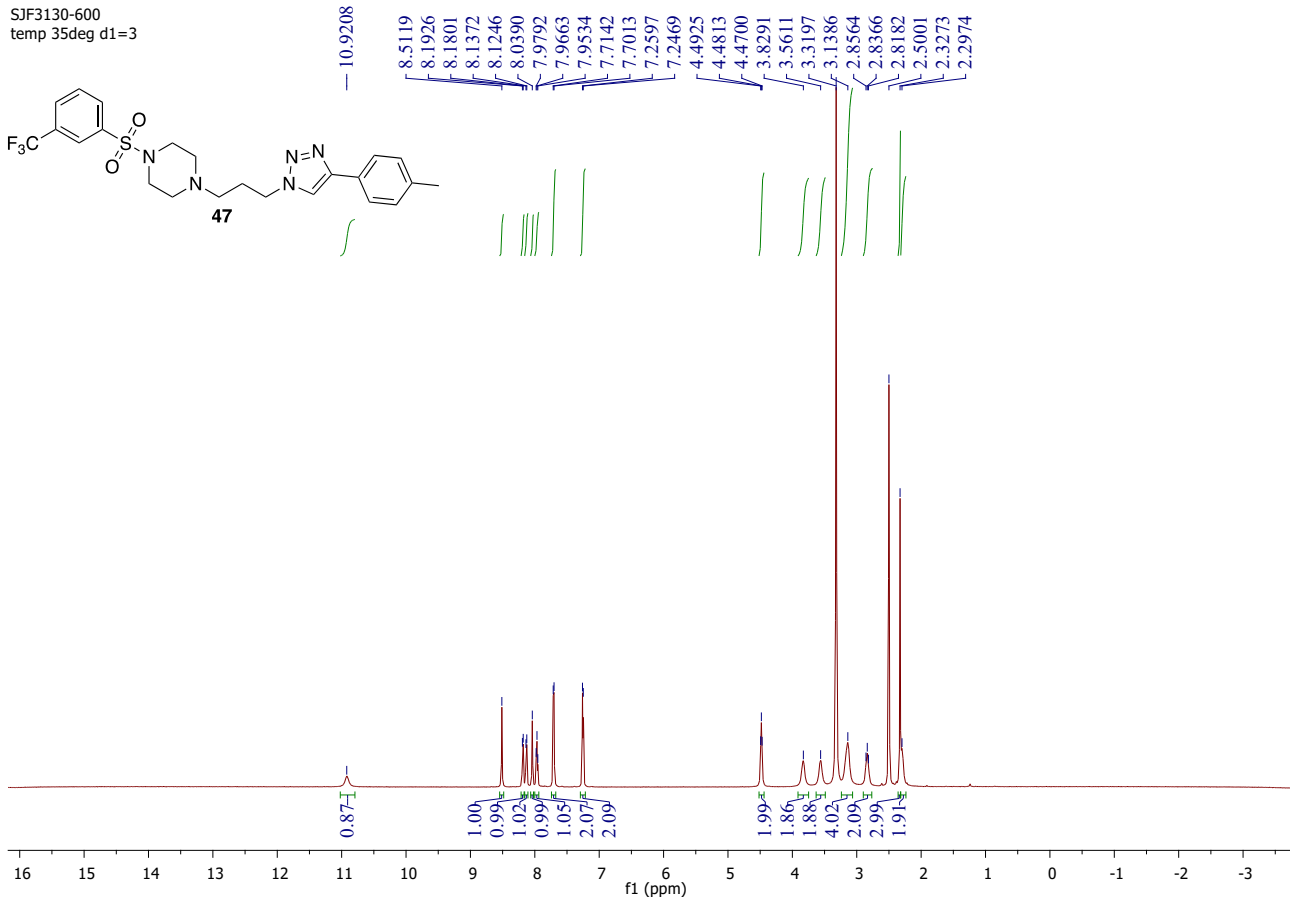

SJF3130

13C\_3hours DMSO (C:\Data) Angela 26

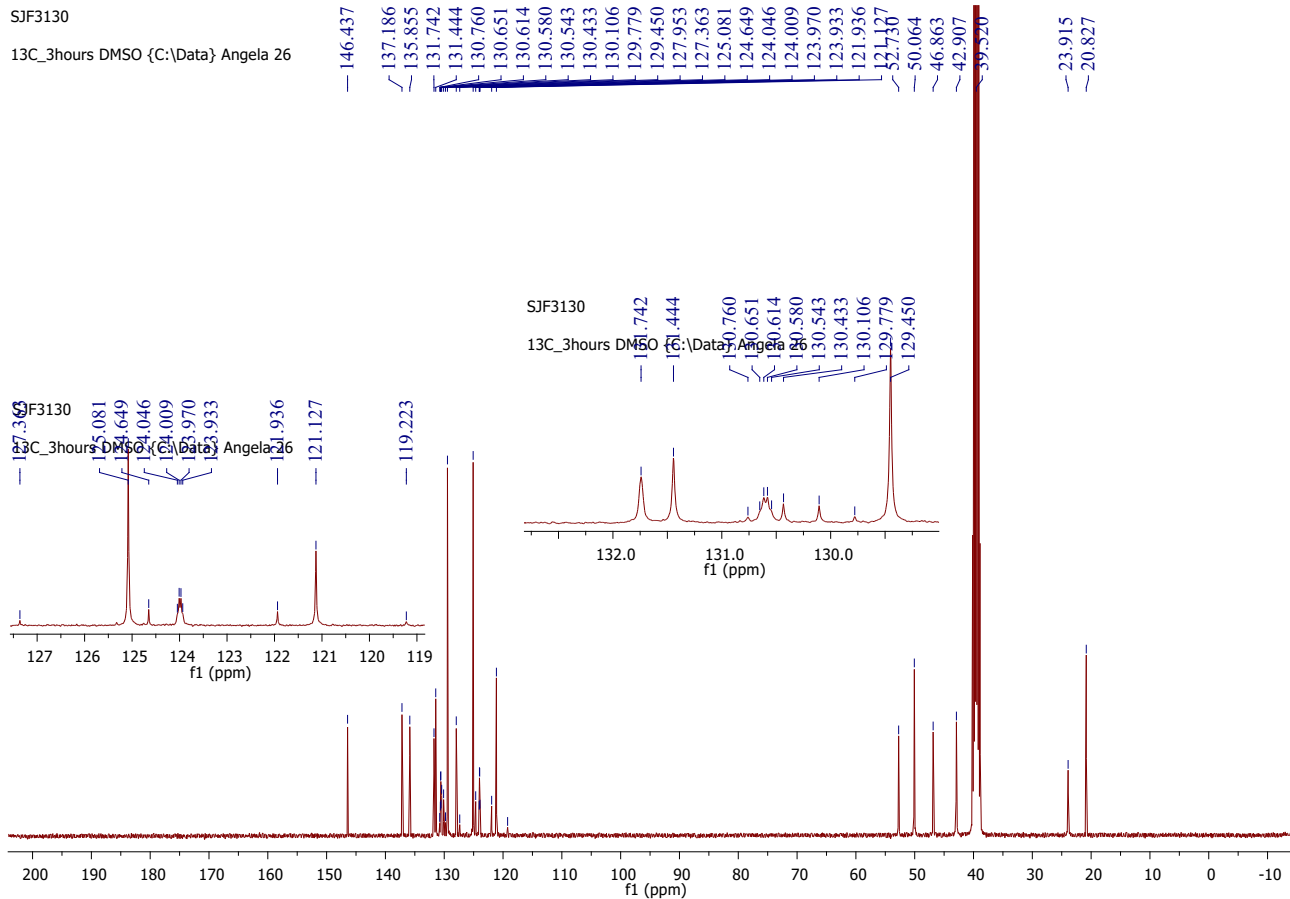

SJF3130

F19CPD DMSO {C:\Data} Angela 26

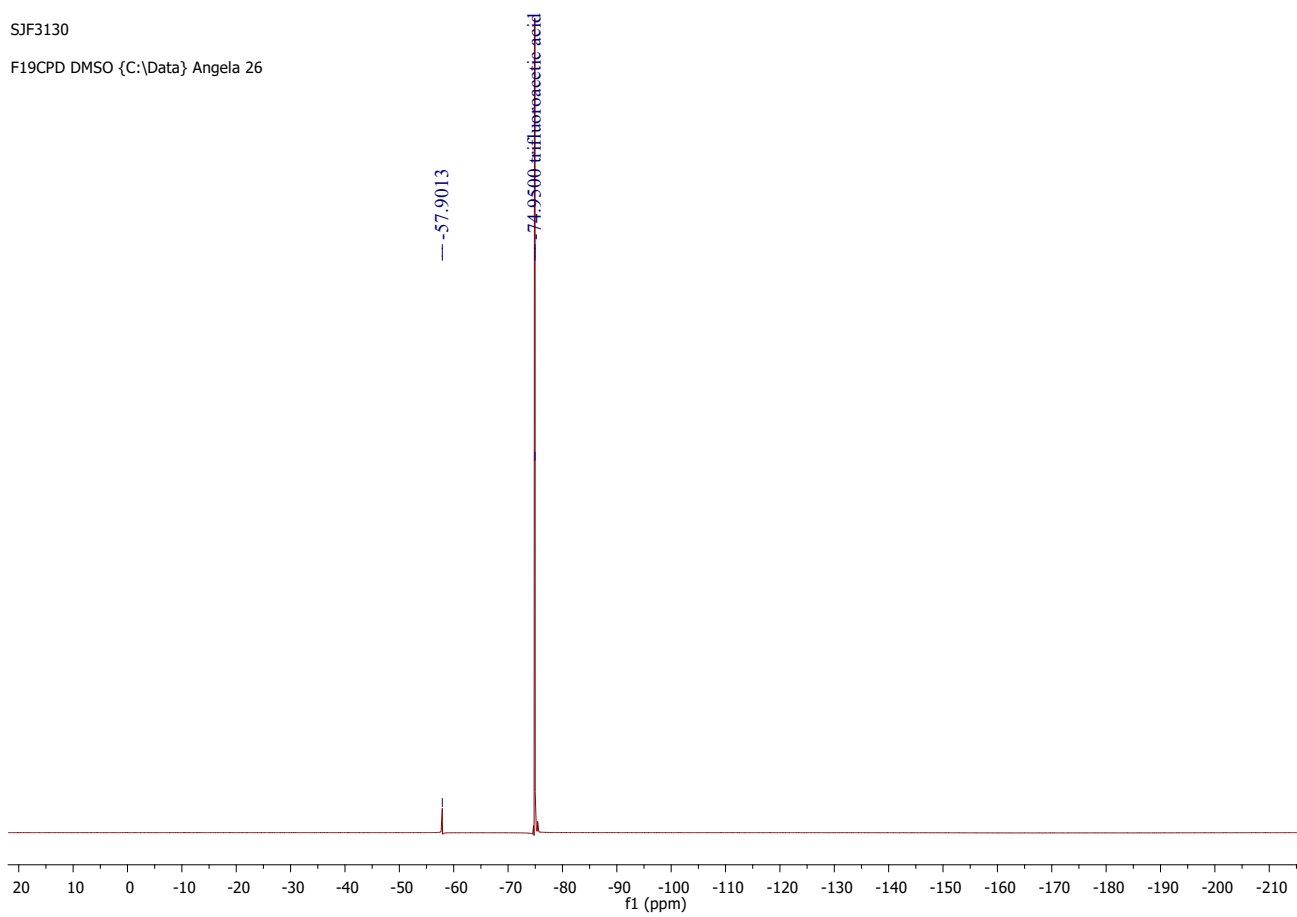



1-[3-[4-(4-Ethyl-phenyl)-[1,2,3]triazol-1-yl]-propyl]-4-(3-trifluoromethylbenzenesulfonyl)-piperazine 3-trifluoromethylbenzenesulfonate (48)

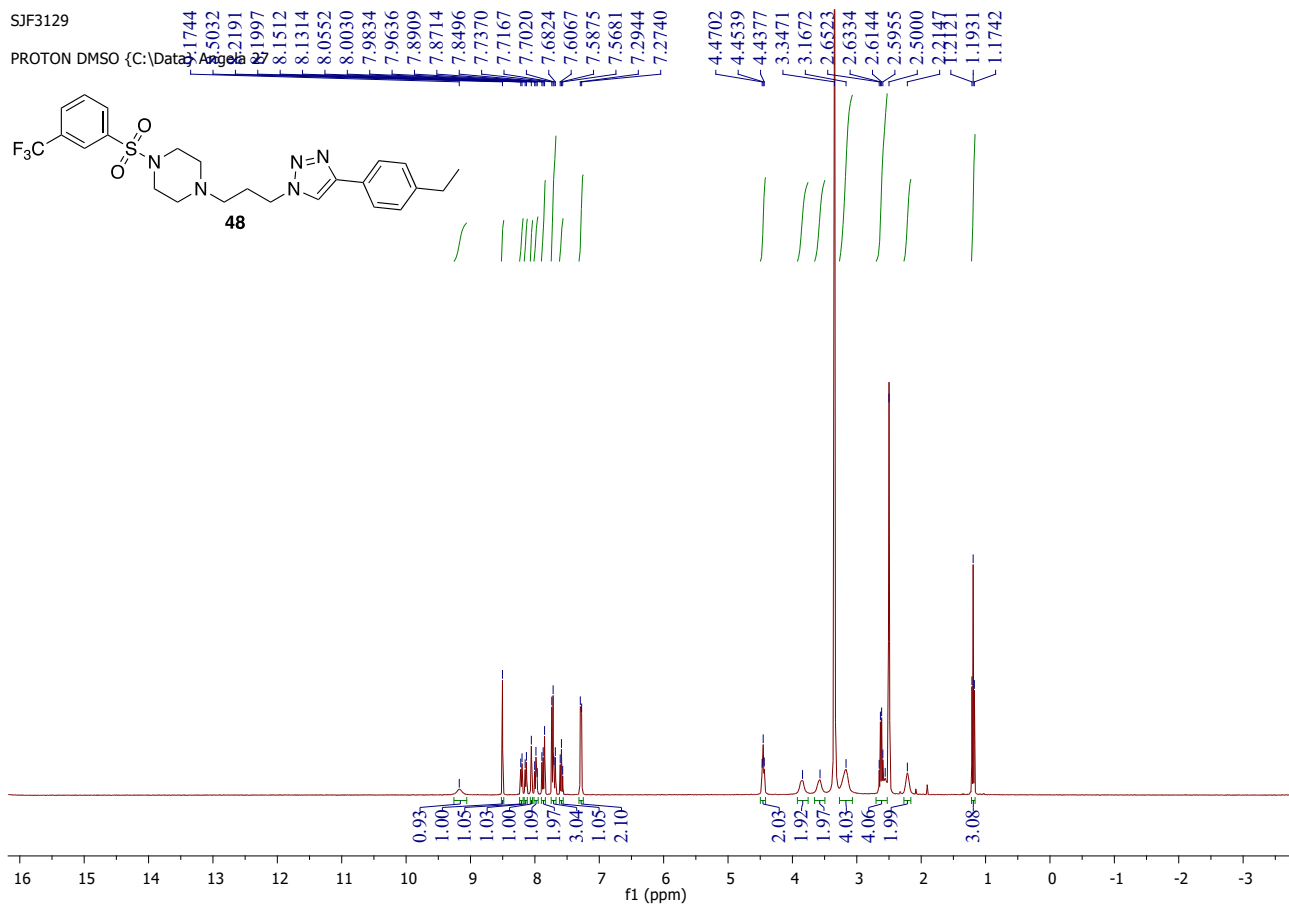

SJF3129

13C\_3hours DMSO {C:\Data} Angela 27

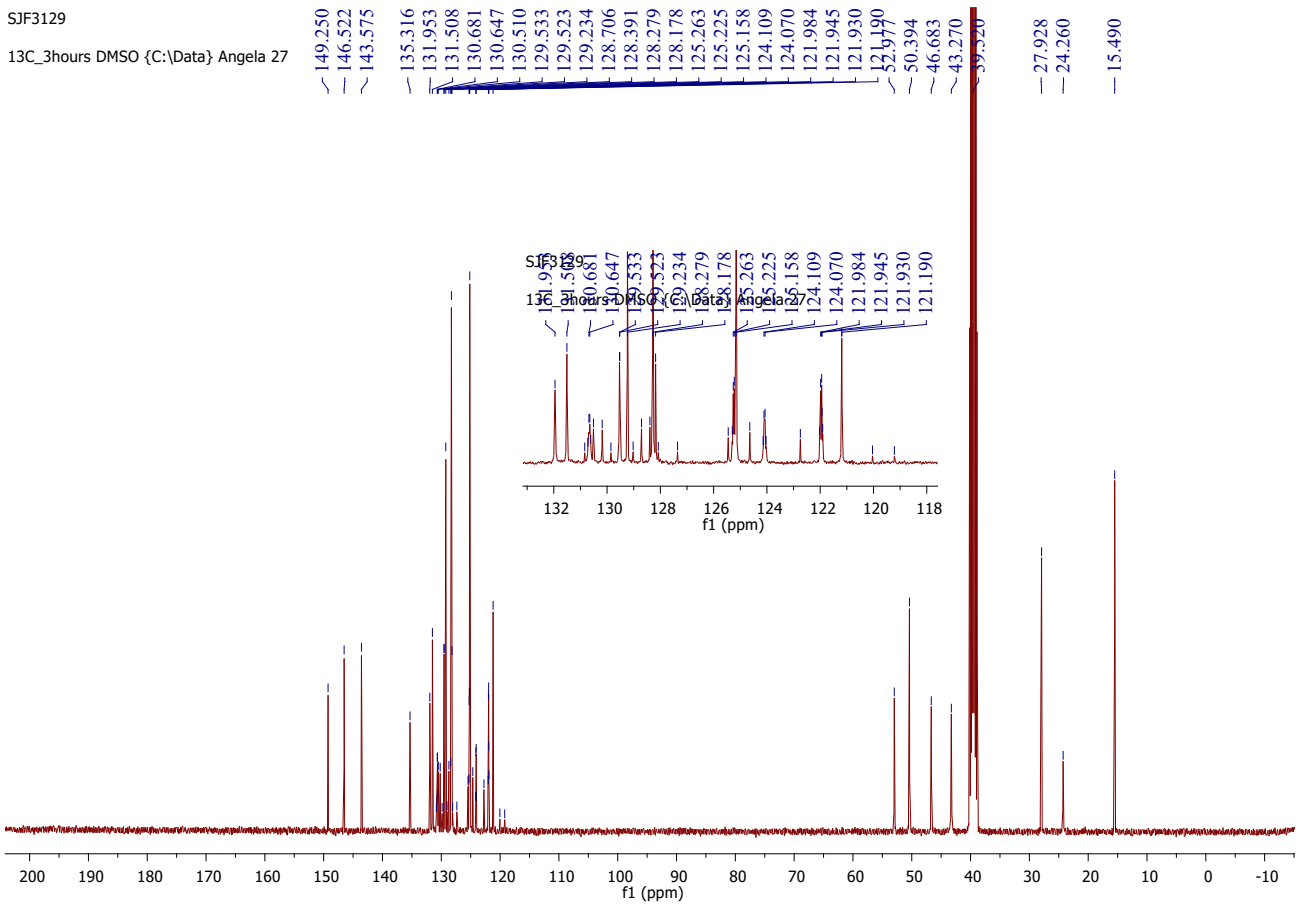

SJF3129

F19CPD DMSO {C:\Data} Angela 56

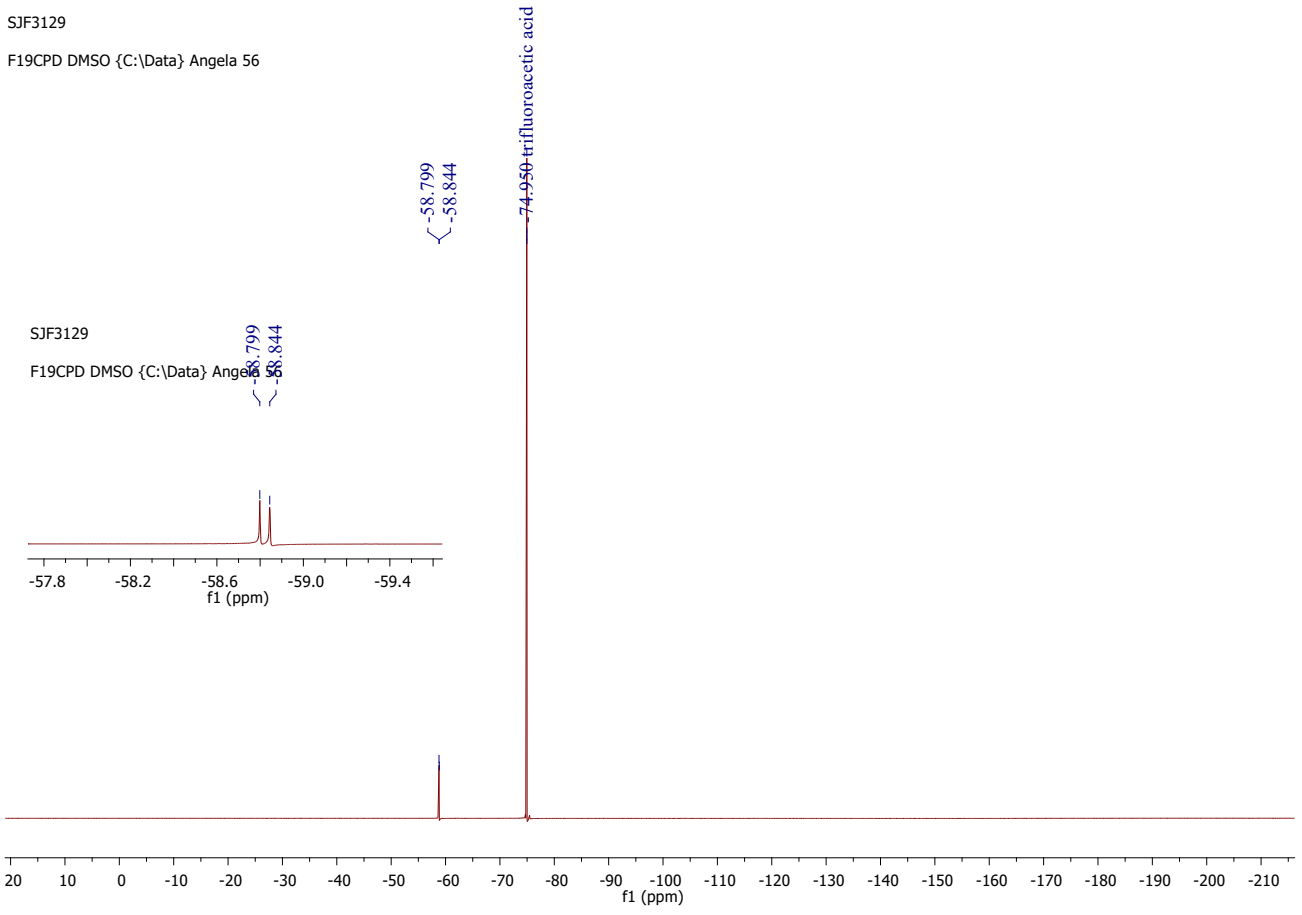

SJF3129

F19CPD DMSO {C:\Data} Angela 56

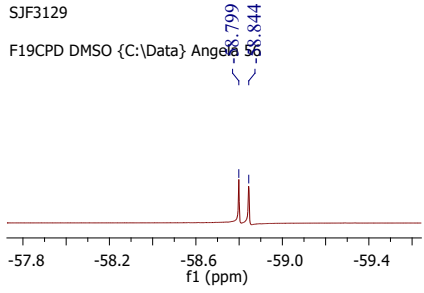

1-[3-[4-(4-Bromophenyl)-[1,2,3]triazol-1-yl]-propyl]-4-(3-trifluoromethylbenzenesulfonyl)-piperazine hydrochloride (49)

SJF3133

PROTON DMSO {C:\Data} Angela 16

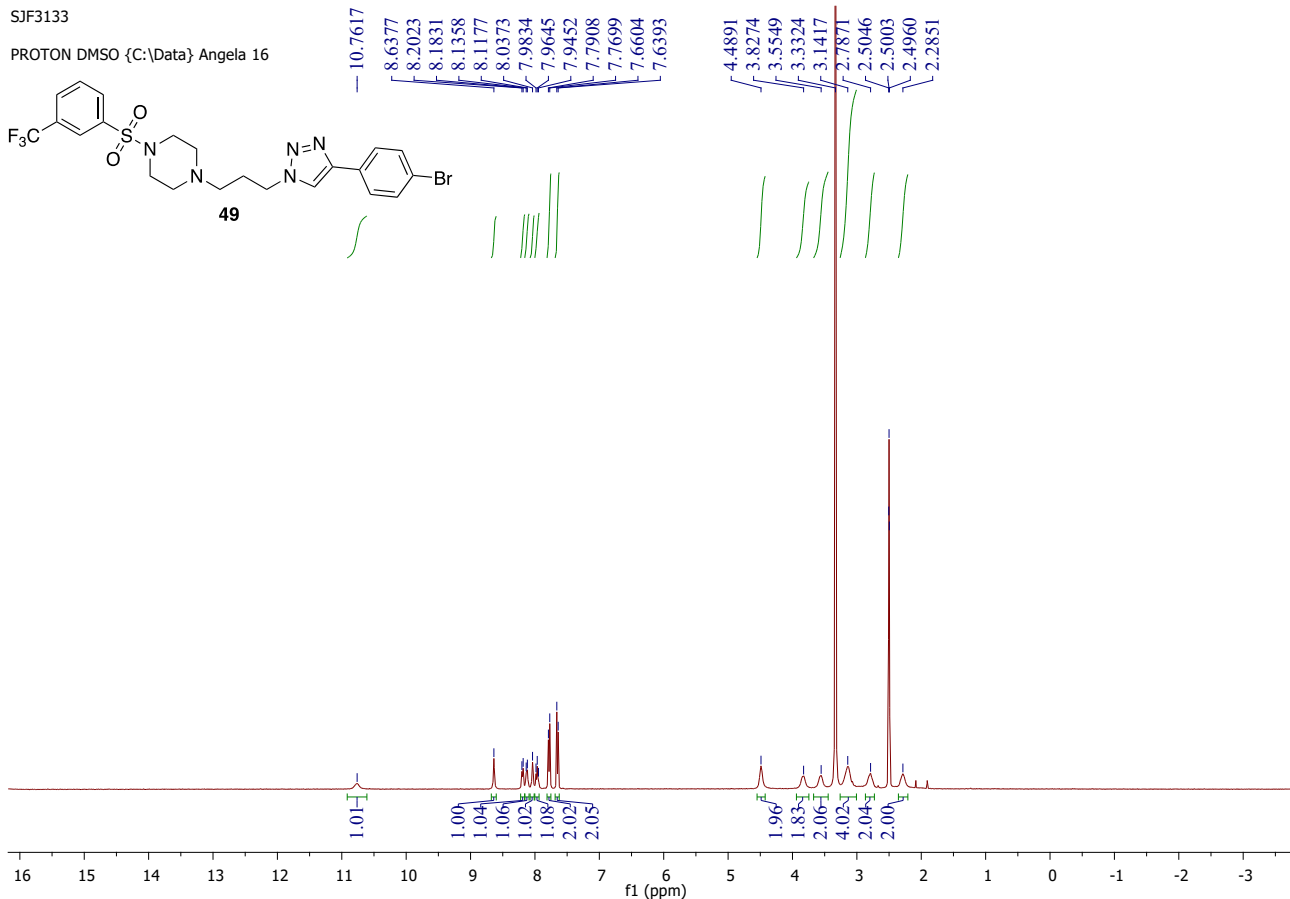

SJF3133

13C\_3hours DMSO {C:\Data} Angela 7

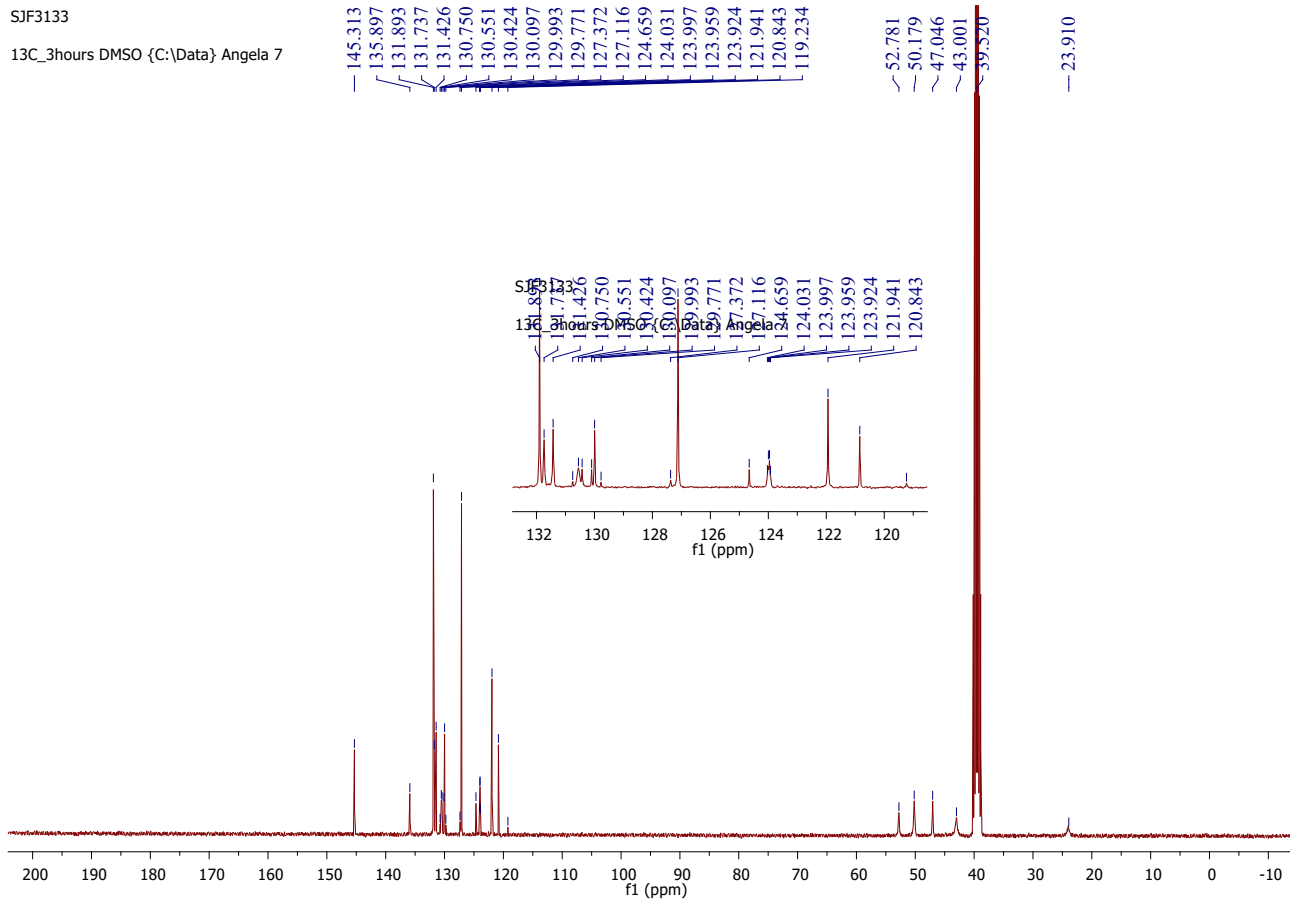

SJF3133

F19CPD DMSO {C:\Data} Angela 38

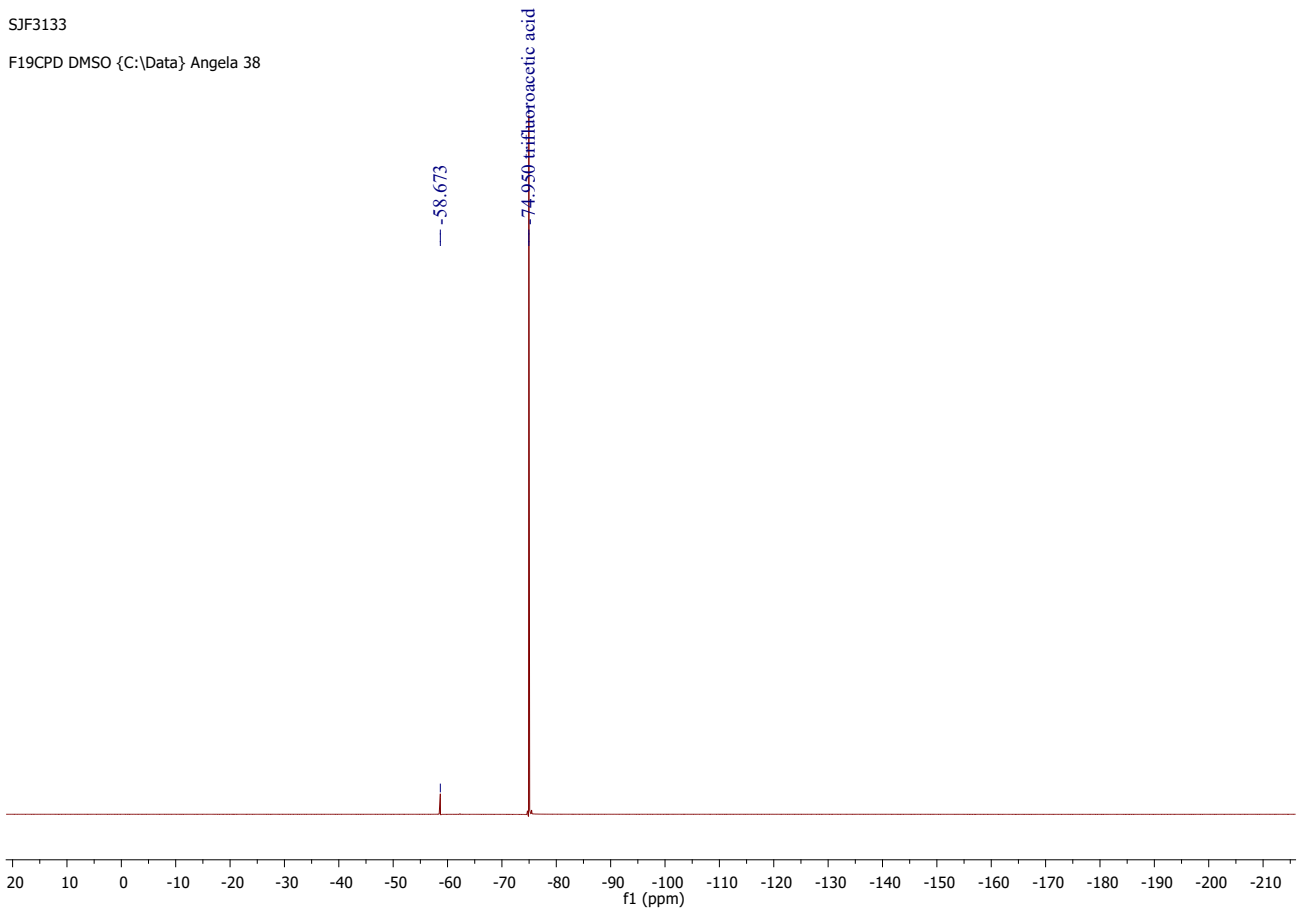

1-(3-Trifluoromethylbenzenesulfonyl)-4-{3-[4-(4-trifluoromethyl-phenyl)-[1,2,3]-triazol-1-yl]-propyl}-piperazine hydrochloride (50)

SJF3135

PROTON DMSO {C:\Data} Angela 17

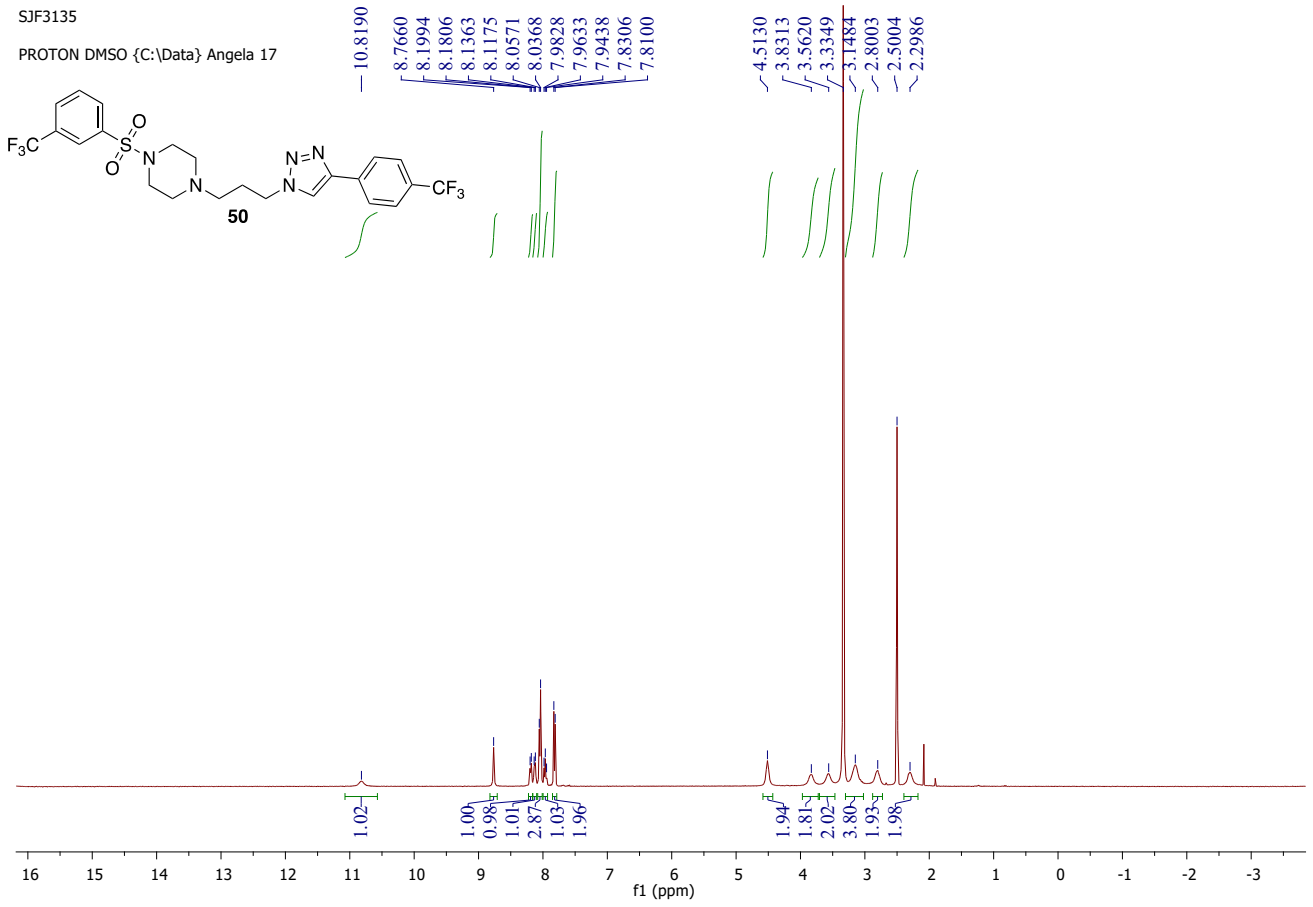

SJF3135

13C\_3hours DMSO (C:\Data) Angela 29

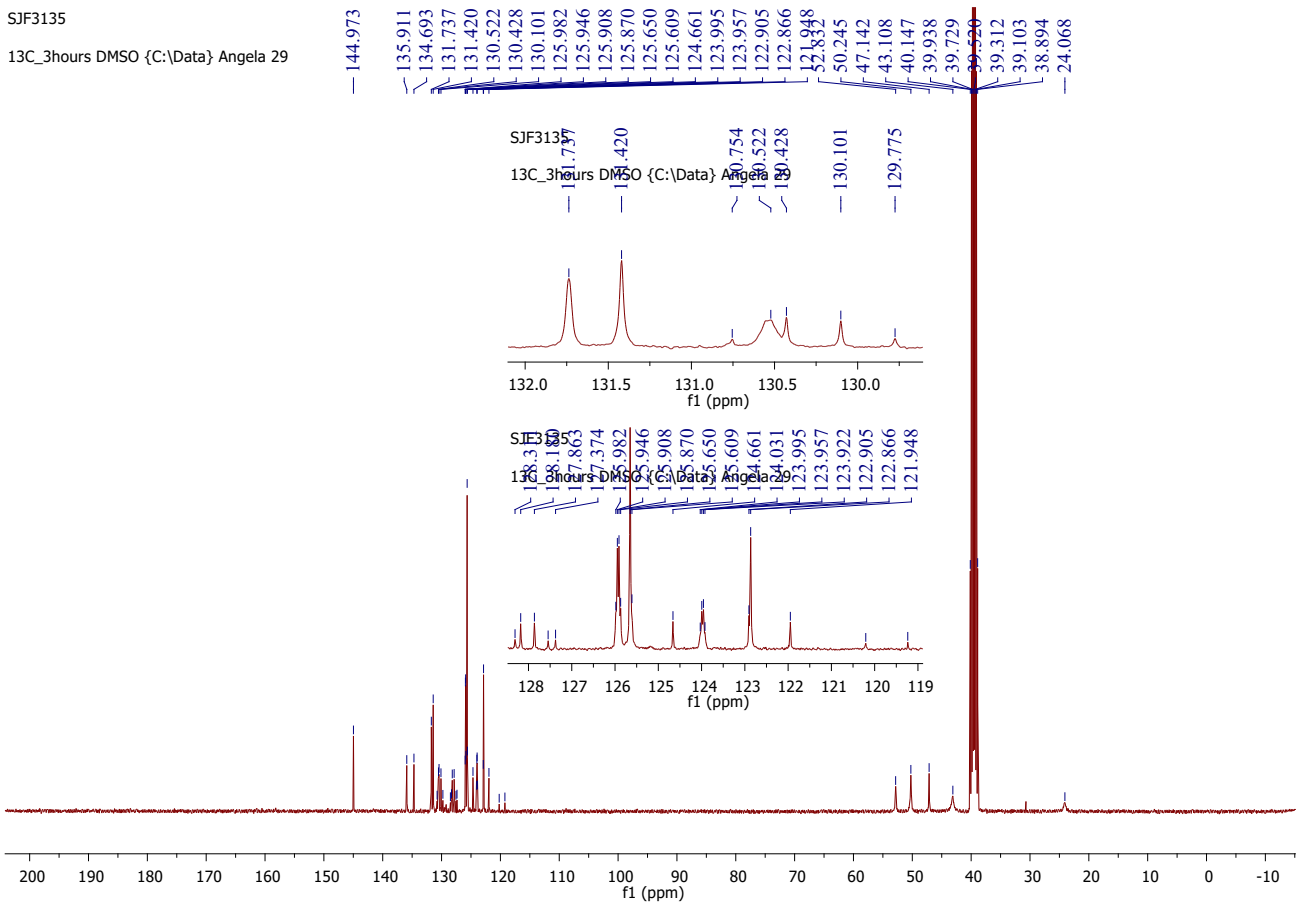

SJF3135

F19CPD DMSO {C:\Data} Angela 20

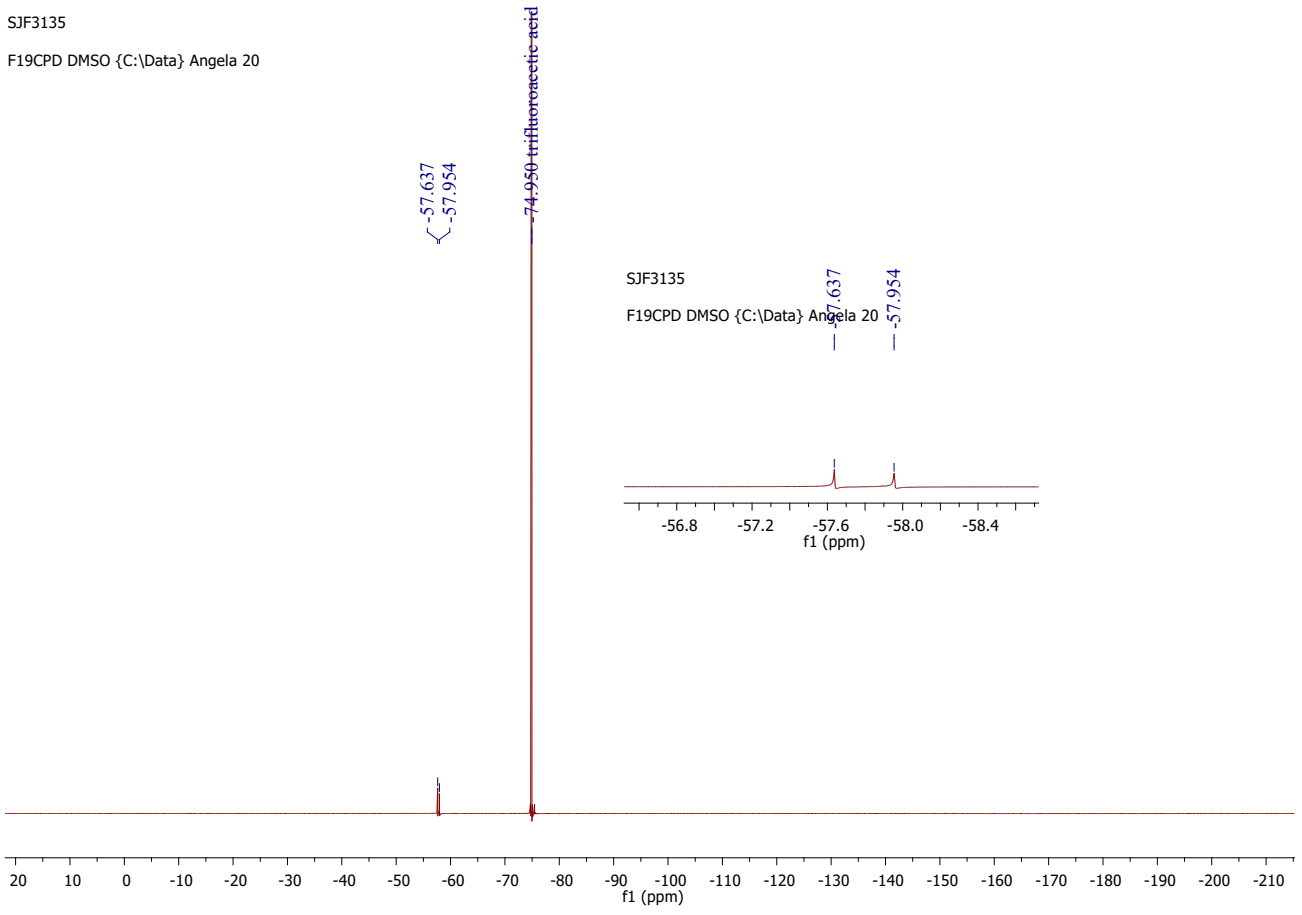



1-{3-[4-(4-Methoxyphenyl)-[1,2,3]triazol-1-yl]-propyl}-4-(4-trifluoromethylbenzenesulfonyl)-piperazine (51)

SJF3182

PROTON DMSO {C:\Data} Angela 28

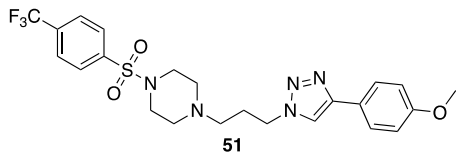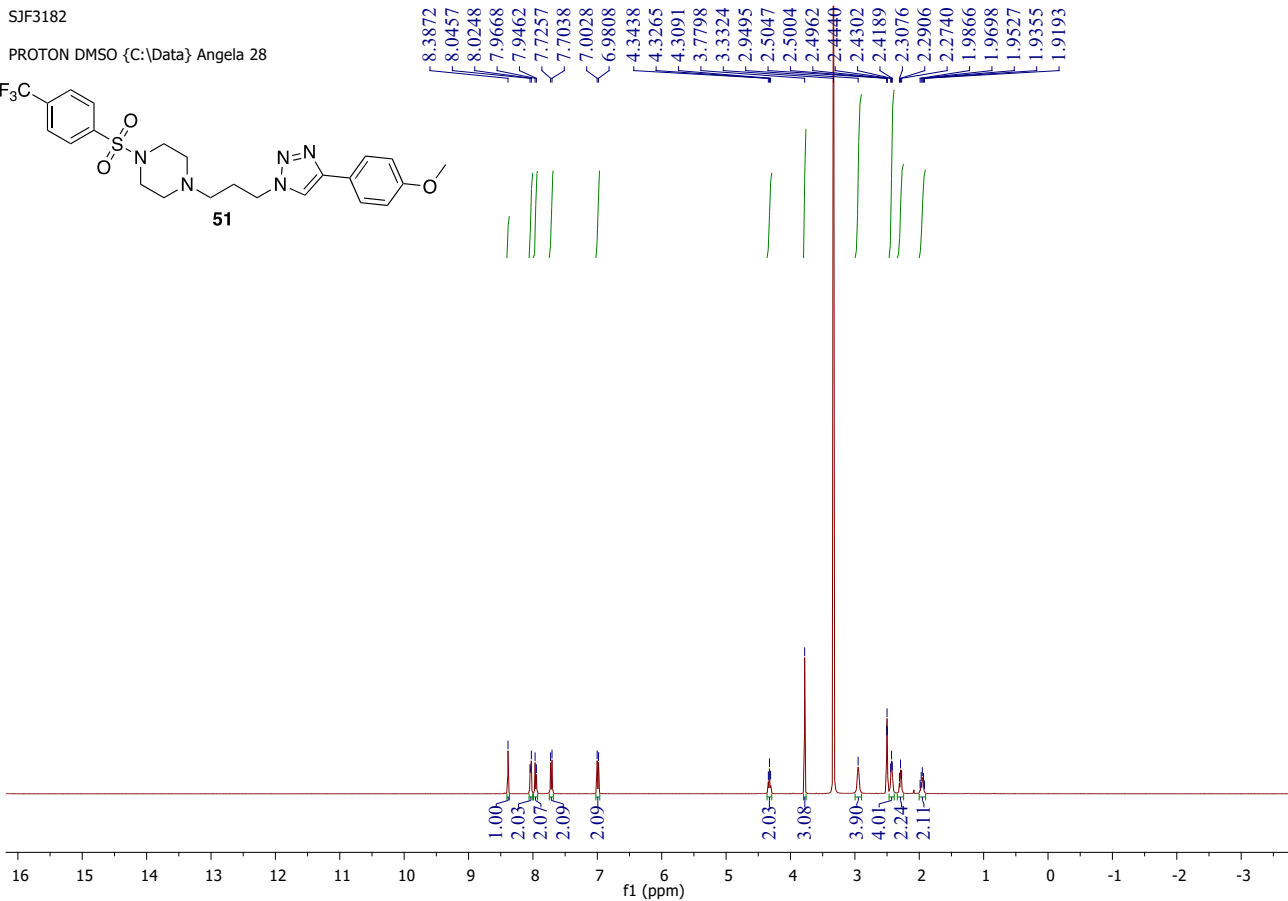

SJF3182

13C\_3hours DMSO {C:\Data} Angela 28

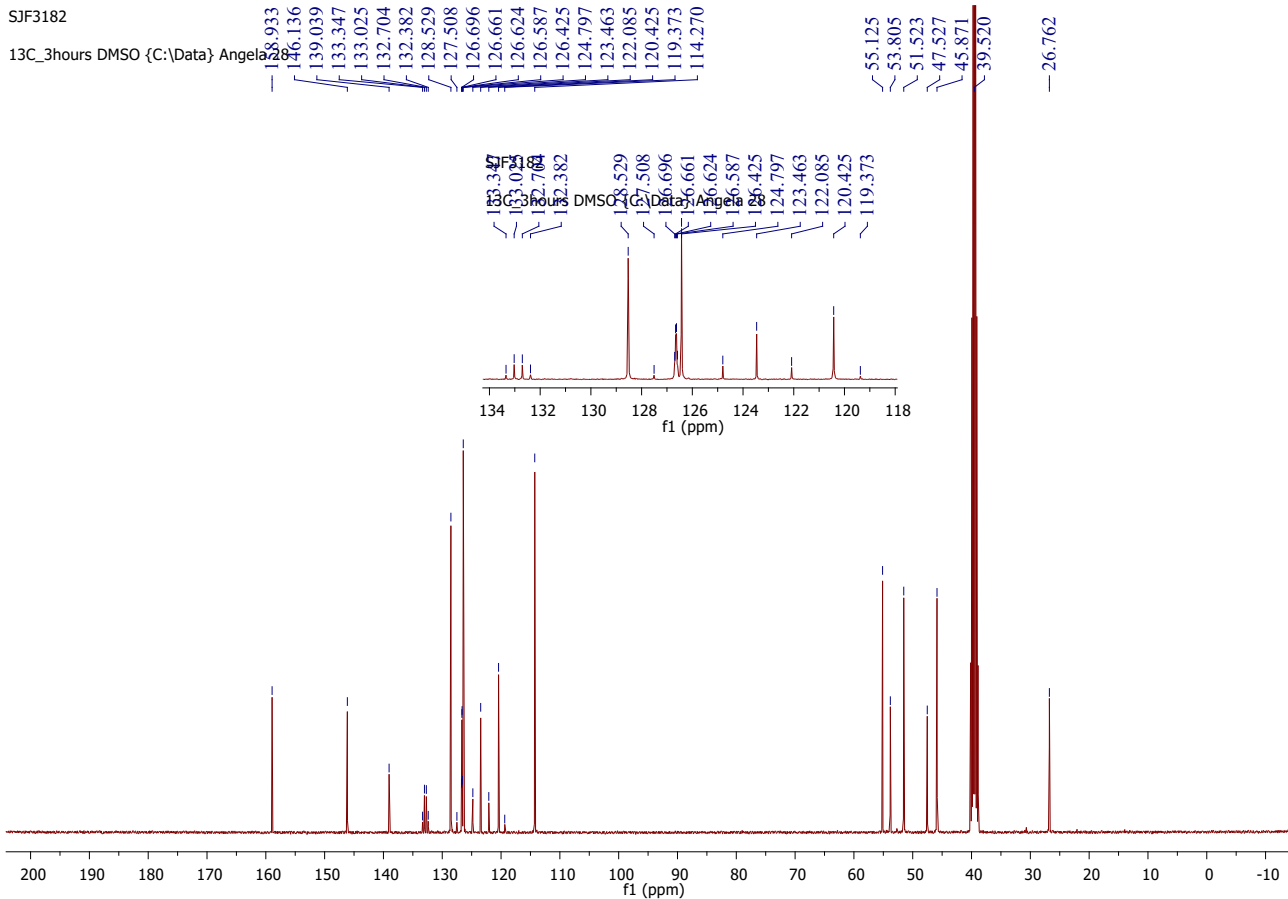

SJF3182

F19CPD DMSO {C:\Data} Angela 56

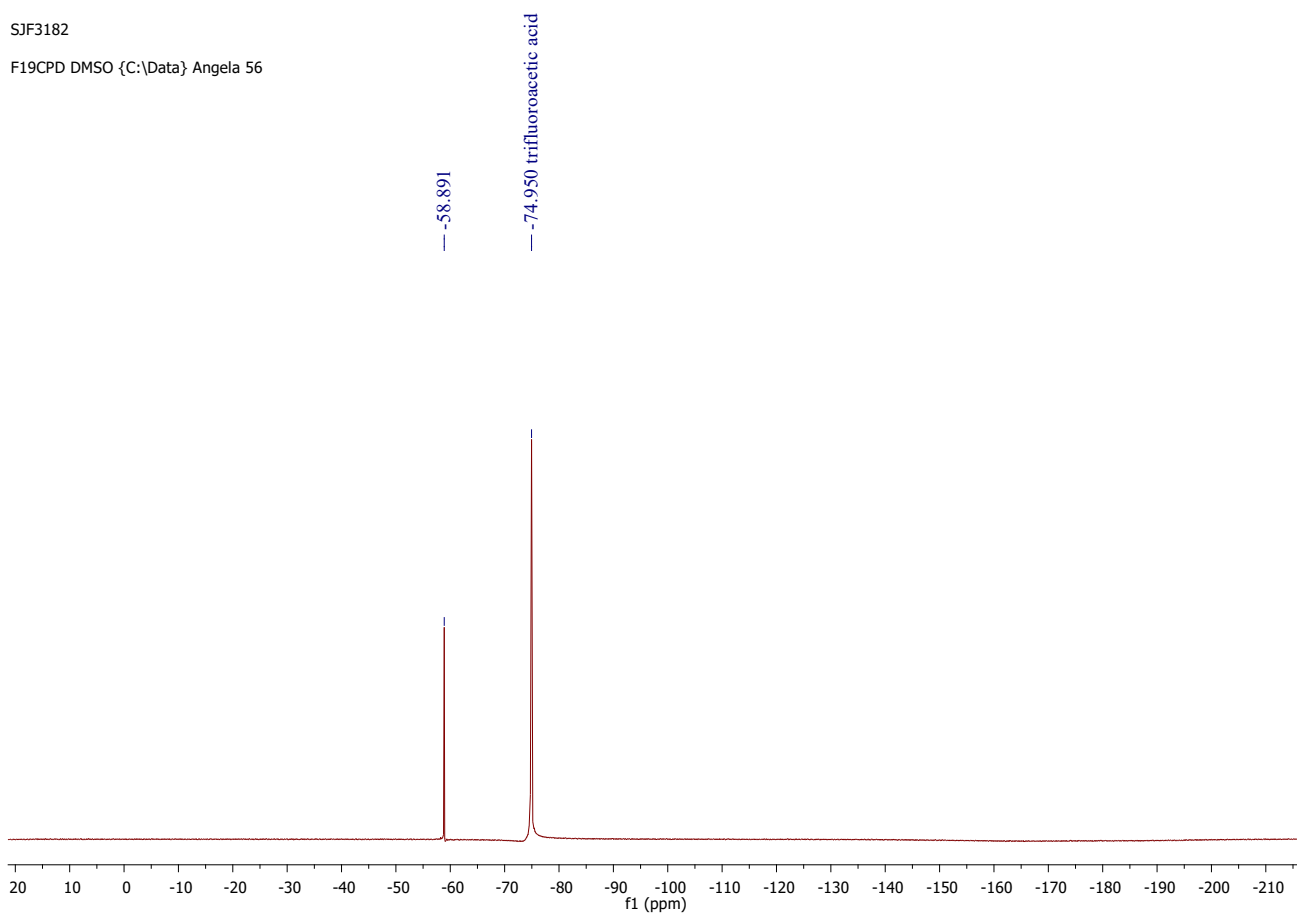

1-{3-[4-(2-Methoxyphenyl)-[1,2,3]triazol-1-yl]-propyl}-4-(4-trifluoromethylbenzenesulfonyl)-piperazine (52)

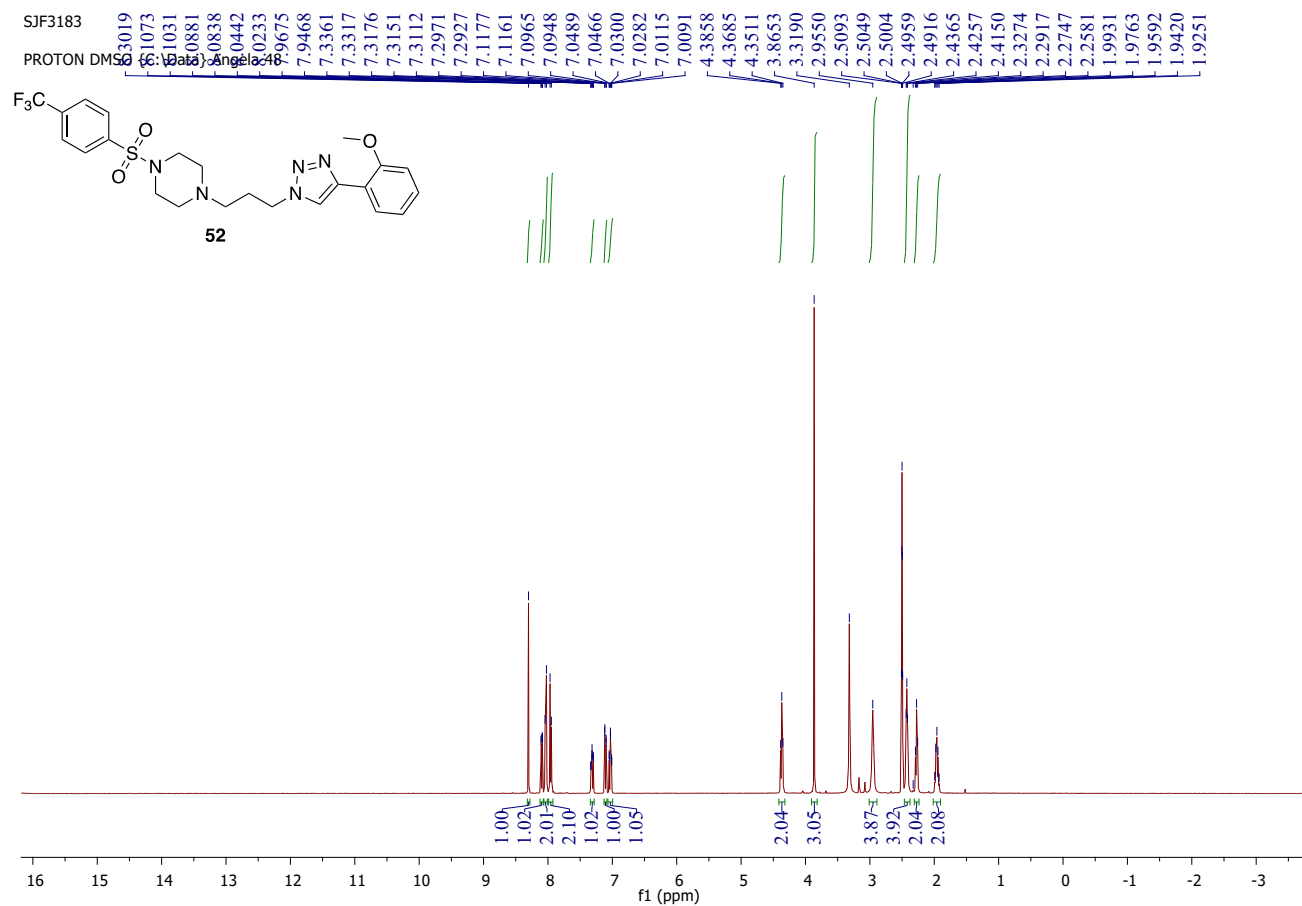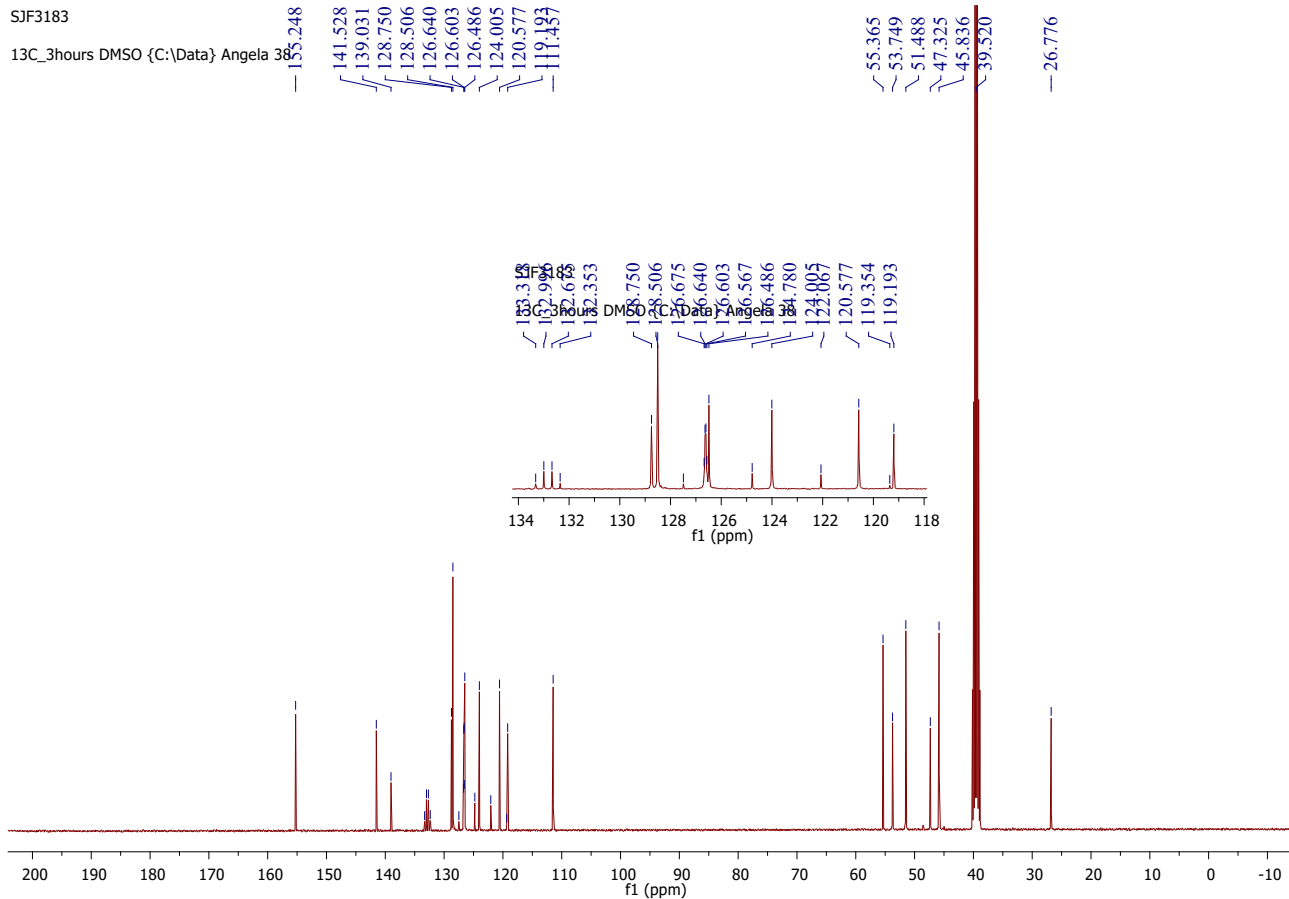

SJF3183

F19CPD DMSO {C:\Data} Angela 38

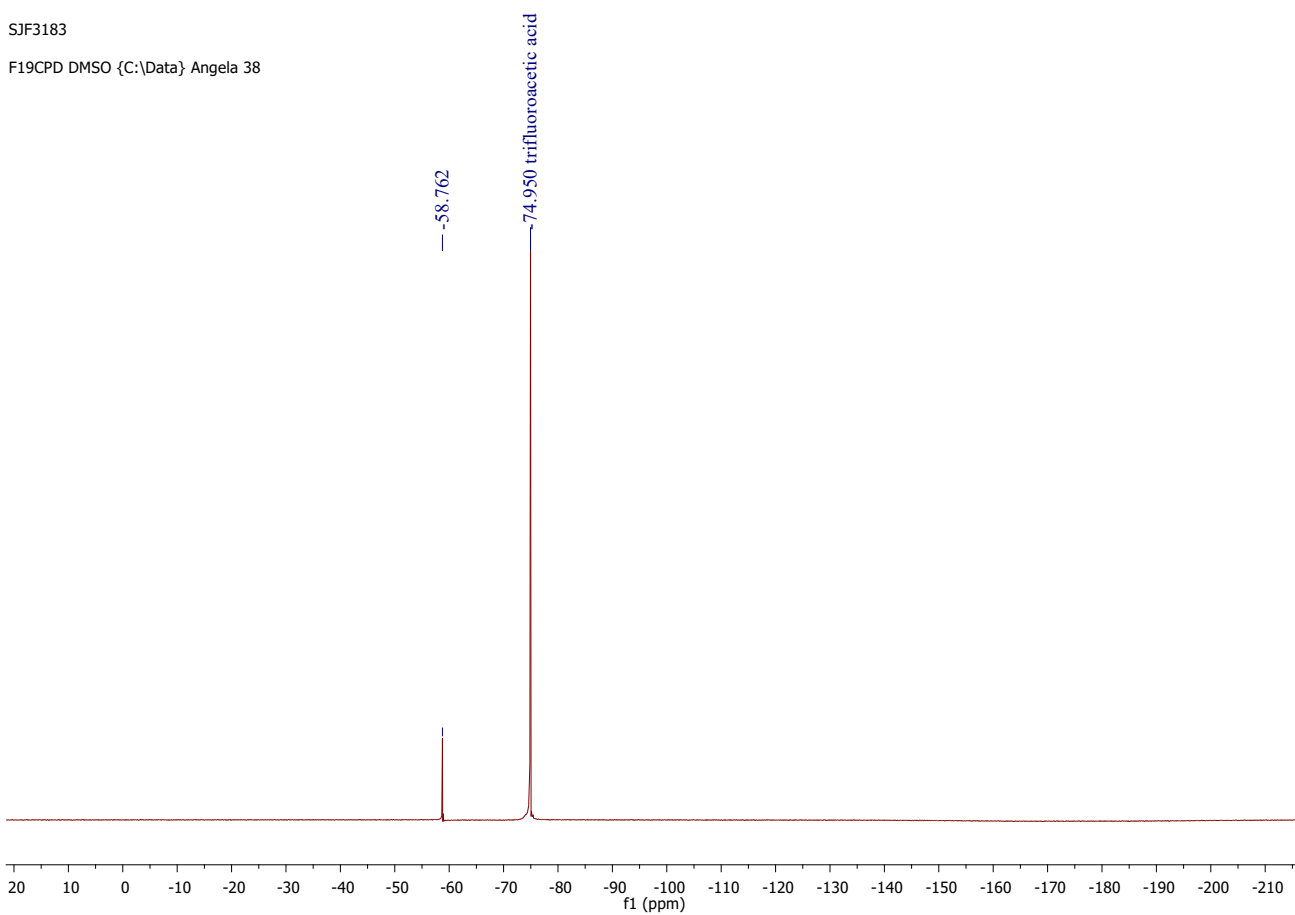

Supplement: d2md00289b1.pdf [file d2md00289b1.pdf]
